# Supplementary material for: Single-Cell Sequencing Reveals Types of Hepatopancreatic Cells and Haemocytes in Black Tiger Shrimp (Penaeus monodon) and Their Molecular Responses to Ammonia Stress
Source: Front Immunol. 2022 May 4;13:883043. doi: 10.3389/fimmu.2022.883043 (PMC9114817; doi:10.3389/fimmu.2022.883043)
Supplement: Supplementary file 1 [file Table_1.xlsx]

## Sheet: Table1_hepatopancreas_sig_mark
p_val	avg_log2FC	pct.1	pct.2	p_val_adj	cluster	gene
0	3.7647	0.886	0.385	0	Hep1	LOC119581838
0	3.5899	0.955	0.492	0	Hep1	LOC119573392
0	3.42405	0.881	0.431	0	Hep1	LOC119574611
0	3.36986	0.854	0.443	0	Hep1	LOC119573322
0	3.36415	0.957	0.506	0	Hep1	LOC119573396
0	3.33081	0.923	0.497	0	Hep1	LOC119584435
0	3.31628	0.859	0.43	0	Hep1	LOC119573321
0	3.16113	0.795	0.286	0	Hep1	LOC119592042
0	3.14055	0.727	0.3	0	Hep1	LOC119584505
0	3.12594	0.679	0.286	0	Hep1	LOC119577915
0	3.119	0.945	0.55	0	Hep1	LOC119571418
0	3.08738	0.778	0.339	0	Hep1	LOC119581794
0	3.07963	0.713	0.258	0	Hep1	LOC119593494
0	3.05465	0.943	0.552	0	Hep1	LOC119594776
0	3.03701	0.749	0.328	0	Hep1	LOC119594769
0	3.02532	0.826	0.412	0	Hep1	LOC119585284
0	2.9937	0.589	0.24	0	Hep1	LOC119577913
0	2.97487	0.669	0.267	0	Hep1	LOC119579249
0	2.90606	0.875	0.478	0	Hep1	LOC119575038
0	2.87343	0.873	0.486	0	Hep1	LOC119594761
0	2.87053	0.573	0.18	0	Hep1	LOC119594172
0	2.85849	0.658	0.282	0	Hep1	LOC119575149
0	2.85496	0.662	0.25	0	Hep1	LOC119592045
0	2.85003	0.678	0.314	0	Hep1	LOC119580293
0	2.82012	0.627	0.295	0	Hep1	LOC119580292
0	2.77938	0.863	0.446	0	Hep1	LOC119589393
0	2.75834	0.384	0.103	0	Hep1	LOC119590800
0	2.75683	0.57	0.235	0	Hep1	LOC119579365
0	2.742	0.605	0.272	0	Hep1	LOC119582061
0	2.74089	0.508	0.182	0	Hep1	LOC119577786
0	2.7281	0.653	0.275	0	Hep1	LOC119595148
0	2.62437	0.476	0.162	0	Hep1	LOC119584265
0	2.60363	0.536	0.2	0	Hep1	LOC119594173
0	2.60342	0.43	0.133	0	Hep1	LOC119579493
0	2.59972	0.436	0.16	0	Hep1	LOC119594779
0	2.58221	0.443	0.113	0	Hep1	LOC119592041
0	2.56743	0.459	0.15	0	Hep1	LOC119582697
0	2.56732	0.536	0.235	0	Hep1	LOC119573400
0	2.55465	0.444	0.129	0	Hep1	LOC119592897
0	2.54001	0.507	0.152	0	Hep1	LOC119573000
0	2.53536	0.445	0.123	0	Hep1	LOC119577111
0	2.49387	0.406	0.131	0	Hep1	LOC119587595
0	2.48392	0.564	0.225	0	Hep1	LOC119569412
0	2.4549	0.459	0.172	0	Hep1	LOC119569841
0	2.42806	0.399	0.127	0	Hep1	LOC119596101
0	2.34817	0.415	0.119	0	Hep1	LOC119588767
0	2.33755	0.54	0.261	0	Hep1	LOC119579080
0	2.31477	0.567	0.333	0	Hep1	LOC119578652
0	2.25545	0.443	0.167	0	Hep1	LOC119576228
0	2.25056	0.468	0.172	0	Hep1	LOC119594744
0	2.20813	0.337	0.088	0	Hep1	LOC119595724
0	2.20674	0.422	0.139	0	Hep1	LOC119588692
0	2.20077	0.48	0.175	0	Hep1	LOC119582877
0	2.18684	0.4	0.172	0	Hep1	LOC119580291
0	2.16669	0.409	0.167	0	Hep1	LOC119594777
0	2.14121	0.351	0.115	0	Hep1	LOC119577787
0	2.11545	0.338	0.107	0	Hep1	LOC119584323
0	2.10575	0.415	0.164	0	Hep1	LOC119583797
0	2.08561	0.329	0.131	0	Hep1	LOC119573402
0	2.06154	0.315	0.072	0	Hep1	LOC119593541
0	2.02438	0.34	0.088	0	Hep1	LOC119592043
0	2.02371	0.312	0.088	0	Hep1	LOC119590085
0	1.89375	0.295	0.082	0	Hep1	LOC119590083
0	1.84501	0.295	0.08	0	Hep1	LOC119582876
0	1.81988	0.278	0.085	0	Hep1	LOC119593173
0	1.79087	0.251	0.045	0	Hep1	LOC119588534
0	1.73144	0.247	0.069	0	Hep1	LOC119573391
0	1.72457	0.273	0.07	0	Hep1	LOC119572916
0	1.68253	0.242	0.064	0	Hep1	LOC119590084
0	1.67383	0.256	0.061	0	Hep1	LOC119581867
0	1.62408	0.22	0.039	0	Hep1	LOC119599002
0	1.57571	0.217	0.046	0	Hep1	LOC119589225
0	1.57423	0.246	0.071	0	Hep1	LOC119585275
0	1.50955	0.258	0.079	0	Hep1	LOC119586463
0	1.4971	0.216	0.046	0	Hep1	LOC119590637
0	1.42377	0.195	0.036	0	Hep1	LOC119575155
0	1.39992	0.472	0.182	0	Hep1	LOC119599431
0	0.844686	0.611	0.231	0	Hep1	LOC119571628
0	0.803408	0.64	0.373	0	Hep1	LOC119589094
0	0.386001	0.389	0.755	0	Hep1	LOC119569086
0	0.341735	0.202	0.56	0	Hep1	LOC119594454
0	0.268395	0.138	0.487	0	Hep1	LOC119570894
2.78254e-300	1.354	0.186	0.036	4.28038e-296	Hep1	LOC119568182
1.48744e-291	1.38087	0.191	0.041	2.28813e-287	Hep1	LOC119594638
4.50892e-290	1.6689	0.242	0.075	6.93607e-286	Hep1	LOC119583798
6.91838e-288	1.45111	0.189	0.041	1.06425e-283	Hep1	LOC119581007
1.24973e-287	1.33313	0.184	0.037	1.92246e-283	Hep1	LOC119577496
6.78357e-285	1.57057	0.24	0.075	1.04352e-280	Hep1	LOC119592367
1.40147e-273	1.42116	0.208	0.055	2.15589e-269	Hep1	LOC119592582
1.21109e-256	1.22311	0.183	0.043	1.86302e-252	Hep1	LOC119587397
1.21329e-254	1.26899	0.188	0.046	1.86641e-250	Hep1	LOC119575356
2.60452e-246	1.46363	0.216	0.069	4.00654e-242	Hep1	LOC119592580
2.84063e-240	1.18176	0.179	0.045	4.36974e-236	Hep1	LOC119584266
7.28218e-231	1.32944	0.196	0.059	1.12022e-226	Hep1	LOC119574681
2.73114e-230	0.885681	0.124	0.016	4.20132e-226	Hep1	LOC119594140
1.65329e-229	1.62596	0.267	0.115	2.54326e-225	Hep1	LOC119585287
5.49134e-220	1.13268	0.156	0.035	8.44733e-216	Hep1	LOC119588631
4.54129e-217	0.618505	0.977	0.98	6.98587e-213	Hep1	LOC119585602
1.02419e-215	1.55093	0.399	0.264	1.57551e-211	Hep1	LOC119594451
7.37414e-211	1.27288	0.156	0.037	1.13436e-206	Hep1	LOC119587594
3.32847e-210	1.08074	0.148	0.033	5.12018e-206	Hep1	LOC119581009
6.18745e-207	0.74859	0.911	0.952	9.51815e-203	Hep1	LOC119572041
4.40738e-205	0.858794	0.12	0.019	6.77988e-201	Hep1	LOC119589110
3.16247e-196	0.875638	0.129	0.025	4.86483e-192	Hep1	LOC119599058
3.22875e-193	0.930594	0.138	0.031	4.96678e-189	Hep1	LOC119592913
6.93542e-192	1.0204	0.129	0.026	1.06688e-187	Hep1	LOC119575148
2.22302e-188	0.719603	0.104	0.014	3.41967e-184	Hep1	LOC119575138
3.04686e-181	1.15587	0.128	0.028	4.68699e-177	Hep1	LOC119577458
3.46199e-180	0.828101	0.115	0.021	5.32558e-176	Hep1	LOC119576964
5.75966e-177	0.84448	0.123	0.026	8.86008e-173	Hep1	LOC119573276
3.2786e-172	0.859102	0.116	0.023	5.04347e-168	Hep1	LOC119587064
4.96041e-172	0.463528	0.825	0.706	7.6306e-168	Hep1	LOC119575181
1.36671e-170	0.83732	0.121	0.026	2.10241e-166	Hep1	LOC119572917
4.23776e-166	0.837999	0.112	0.022	6.51895e-162	Hep1	LOC119597863
7.04456e-164	0.595429	0.737	0.754	1.08366e-159	Hep1	LOC119577888
1.83198e-162	1.07986	0.166	0.057	2.81813e-158	Hep1	LOC119574683
9.49695e-159	0.703268	0.105	0.02	1.46092e-154	Hep1	LOC119594575
7.13243e-150	0.832474	0.11	0.024	1.09718e-145	Hep1	LOC119568118
1.62318e-148	0.500572	0.317	0.616	2.49693e-144	Hep1	LOC119569471
4.68372e-134	0.275175	0.139	0.32	7.20497e-130	Hep1	LOC119588082
2.03679e-130	0.310044	0.11	0.266	3.13319e-126	Hep1	LOC119583420
2.63193e-130	0.773357	0.103	0.025	4.0487e-126	Hep1	LOC119578359
4.95184e-130	0.766417	0.11	0.029	7.61741e-126	Hep1	LOC119585426
7.56381e-130	1.06505	0.997	0.994	1.16354e-125	Hep1	LOC119572042
8.20027e-128	0.973555	0.136	0.046	1.26145e-123	Hep1	LOC119580448
7.21319e-127	0.714804	0.106	0.028	1.10961e-122	Hep1	LOC119595138
7.4535e-124	0.322878	0.877	0.853	1.14657e-119	Hep1	LOC119597152
2.28582e-122	0.282073	0.107	0.255	3.51627e-118	Hep1	LOC119575343
4.11545e-122	0.271327	0.1	0.244	6.33079e-118	Hep1	LOC119593043
7.24676e-117	0.272379	0.279	0.533	1.11477e-112	Hep1	LOC119569194
5.51171e-111	0.841178	0.121	0.041	8.47867e-107	Hep1	LOC119580294
6.29155e-111	0.257198	0.066	0.178	9.67829e-107	Hep1	LOC119592107
3.28631e-109	0.306027	0.147	0.311	5.05532e-105	Hep1	LOC119586822
8.44973e-106	0.292492	0.201	0.392	1.29982e-101	Hep1	LOC119577594
1.44382e-100	0.868352	0.118	0.043	2.22102e-96	Hep1	LOC119576274
9.08367e-98	1.34049	0.476	0.497	1.39734e-93	Hep1	LOC119575039
3.12162e-95	0.500023	0.598	0.568	4.802e-91	Hep1	LOC119579337
1.17688e-91	0.2574	0.302	0.545	1.81039e-87	Hep1	LOC119571898
2.45581e-91	0.343088	0.971	0.986	3.77777e-87	Hep1	LOC119585600
1.97314e-90	0.384885	0.148	0.297	3.03528e-86	Hep1	LOC119596375
1.443e-88	0.251126	0.271	0.487	2.21976e-84	Hep1	LOC119576128
1.60958e-87	0.440998	0.173	0.332	2.47602e-83	Hep1	LOC119591590
2.63697e-87	0.282627	0.136	0.273	4.05645e-83	Hep1	LOC119598704
6.11019e-85	0.436034	0.196	0.373	9.39931e-81	Hep1	LOC119585897
1.26696e-82	0.357031	0.148	0.288	1.94897e-78	Hep1	LOC119583493
2.28164e-82	0.282901	0.111	0.229	3.50985e-78	Hep1	LOC119576831
8.24913e-81	0.372554	0.985	0.99	1.26896e-76	Hep1	LOC119568671
5.22985e-79	0.357309	0.09	0.197	8.04508e-75	Hep1	LOC119580176
6.21117e-78	0.274097	0.1	0.208	9.55464e-74	Hep1	LOC119575500
7.155e-76	0.250211	0.35	0.61	1.10065e-71	Hep1	LOC119595866
1.35553e-70	1.37927	0.23	0.166	2.08521e-66	Hep1	LOC119592924
1.86604e-67	0.404291	0.336	0.577	2.87054e-63	Hep1	LOC119582031
6.1711e-61	0.581523	0.221	0.382	9.493e-57	Hep1	LOC119598594
1.46274e-55	0.660677	0.116	0.218	2.25013e-51	Hep1	LOC119590782
2.04641e-55	0.275613	0.093	0.18	3.14799e-51	Hep1	LOC119580758
2.48291e-54	0.327678	0.577	0.525	3.81946e-50	Hep1	LOC119575187
1.62276e-53	0.548231	0.677	0.817	2.4963e-49	Hep1	LOC119596573
5.44277e-53	0.8356	0.16	0.1	8.37262e-49	Hep1	LOC119581602
5.80739e-51	0.647487	0.411	0.38	8.93351e-47	Hep1	LOC119573628
1.45676e-50	0.268453	0.87	0.842	2.24093e-46	Hep1	LOC119595458
3.89232e-48	0.48138	0.118	0.212	5.98756e-44	Hep1	LOC119590781
6.85744e-47	0.611418	0.118	0.207	1.05488e-42	Hep1	LOC119595447
1.97704e-45	0.674033	0.101	0.053	3.04129e-41	Hep1	LOC119579545
1.79735e-43	0.299559	0.09	0.167	2.76487e-39	Hep1	LOC119568445
5.58844e-43	0.267001	0.724	0.742	8.59669e-39	Hep1	LOC119575479
6.91176e-41	0.308226	0.306	0.478	1.06324e-36	Hep1	LOC119584255
7.27479e-41	0.508294	0.154	0.252	1.11908e-36	Hep1	LOC119573314
4.61267e-36	0.253325	0.177	0.281	7.09567e-32	Hep1	LOC119570371
3.75697e-35	0.276881	0.102	0.171	5.77934e-31	Hep1	LOC119575449
2.31771e-33	0.379106	0.319	0.502	3.56534e-29	Hep1	LOC119584968
3.11954e-33	0.260657	0.099	0.168	4.79879e-29	Hep1	LOC119590768
6.85575e-33	0.377605	0.089	0.154	1.05462e-28	Hep1	LOC119590777
1.24291e-32	0.471644	0.134	0.216	1.91196e-28	Hep1	LOC119570189
3.48879e-32	0.254105	0.38	0.581	5.3668e-28	Hep1	LOC119575077
6.57906e-28	0.48416	0.936	0.963	1.01206e-23	Hep1	LOC119572028
2.13088e-22	0.292121	0.069	0.113	3.27793e-18	Hep1	LOC119581929
3.36615e-22	0.603002	0.117	0.082	5.17814e-18	Hep1	LOC119597840
3.47936e-21	0.876195	0.295	0.291	5.35229e-17	Hep1	LOC119581983
4.47395e-20	0.283138	0.135	0.197	6.88227e-16	Hep1	LOC119573078
9.65702e-18	0.855777	0.247	0.235	1.48554e-13	Hep1	LOC119598155
5.72743e-16	0.411307	0.141	0.108	8.8105e-12	Hep1	LOC119575165
4.99041e-15	0.599033	0.104	0.078	7.67675e-11	Hep1	LOC119569621
1.05809e-14	0.472192	0.129	0.1	1.62767e-10	Hep1	LOC119590125
6.47882e-14	0.357227	0.184	0.25	9.96636e-10	Hep1	LOC119575247
7.04513e-13	0.54714	0.407	0.427	1.08375e-08	Hep1	LOC119597911
1.62878e-10	0.302867	0.098	0.134	2.50555e-06	Hep1	LOC119596783
1.04739e-09	0.50919	0.397	0.607	1.6112e-05	Hep1	LOC119580356
2.01744e-09	0.708736	0.602	0.771	3.10343e-05	Hep1	LOC119585167
1.87678e-07	0.446268	0.471	0.563	0.00288706	Hep1	LOC119592714
2.57466e-07	0.515372	0.644	0.828	0.0039606	Hep1	LOC119585599
4.72638e-07	0.552224	0.129	0.114	0.00727058	Hep1	LOC119595128
3.23558e-06	0.284241	0.128	0.16	0.0497729	Hep1	LOC119575164
0	3.05677	0.805	0.281	0	Hep2	LOC119581175
0	2.78596	1	0.956	0	Hep2	LOC119592972
0	2.48241	0.873	0.36	0	Hep2	LOC119590689
0	2.34922	0.927	0.331	0	Hep2	LOC119597082
0	2.34364	0.749	0.183	0	Hep2	LOC119590691
0	2.24533	0.856	0.293	0	Hep2	LOC119582643
0	2.15952	0.909	0.368	0	Hep2	LOC119590716
0	2.13084	0.765	0.211	0	Hep2	LOC119581993
0	2.11974	0.417	0.089	0	Hep2	LOC119592540
0	1.97964	0.959	0.426	0	Hep2	LOC119584581
0	1.96214	0.97	0.641	0	Hep2	LOC119579330
0	1.92972	0.958	0.436	0	Hep2	LOC119595003
0	1.87214	0.966	0.383	0	Hep2	LOC119591302
0	1.86563	0.956	0.402	0	Hep2	LOC119582087
0	1.86035	0.543	0.06	0	Hep2	LOC119590578
0	1.78531	0.973	0.743	0	Hep2	LOC119584229
0	1.77165	0.587	0.157	0	Hep2	LOC119581994
0	1.76156	0.922	0.298	0	Hep2	LOC119572188
0	1.75748	0.688	0.188	0	Hep2	LOC119592886
0	1.71789	0.796	0.364	0	Hep2	LOC119588544
0	1.71057	0.885	0.324	0	Hep2	LOC119595037
0	1.69205	0.938	0.416	0	Hep2	LOC119592498
0	1.64693	1	0.943	0	Hep2	LOC119581179
0	1.5946	0.585	0.142	0	Hep2	LOC119574137
0	1.5945	0.572	0.088	0	Hep2	LOC119579030
0	1.58629	0.653	0.147	0	Hep2	LOC119585809
0	1.582	0.782	0.358	0	Hep2	LOC119576123
0	1.56412	0.692	0.107	0	Hep2	LOC119581824
0	1.52679	0.99	0.813	0	Hep2	LOC119584239
0	1.50677	0.371	0.009	0	Hep2	LOC119593934
0	1.48441	0.798	0.241	0	Hep2	LOC119578843
0	1.48061	0.588	0.089	0	Hep2	LOC119579540
0	1.47695	0.915	0.336	0	Hep2	LOC119597110
0	1.47351	0.862	0.501	0	Hep2	LOC119598901
0	1.45371	0.896	0.366	0	Hep2	LOC119574144
0	1.39167	0.675	0.166	0	Hep2	LOC119581907
0	1.38578	0.978	0.742	0	Hep2	LOC119572230
0	1.38181	0.677	0.105	0	Hep2	LOC119596964
0	1.37416	0.862	0.253	0	Hep2	LOC119596077
0	1.36194	0.998	0.816	0	Hep2	LOC119577562
0	1.3492	0.965	0.491	0	Hep2	LOC119592422
0	1.34271	0.93	0.402	0	Hep2	LOC119585768
0	1.34113	0.829	0.227	0	Hep2	LOC119594148
0	1.3407	0.728	0.137	0	Hep2	LOC119585047
0	1.33924	0.781	0.255	0	Hep2	LOC119584457
0	1.33201	0.836	0.293	0	Hep2	LOC119588681
0	1.3001	0.879	0.594	0	Hep2	LOC119584227
0	1.28059	0.828	0.25	0	Hep2	LOC119591985
0	1.27904	0.771	0.156	0	Hep2	LOC119585084
0	1.25954	0.908	0.429	0	Hep2	LOC119591323
0	1.25607	0.939	0.432	0	Hep2	LOC119573188
0	1.244	0.963	0.565	0	Hep2	LOC119598198
0	1.24241	0.823	0.194	0	Hep2	LOC119574854
0	1.2386	0.948	0.538	0	Hep2	LOC119591583
0	1.23249	0.799	0.191	0	Hep2	LOC119586367
0	1.23234	0.542	0.072	0	Hep2	LOC119594724
0	1.22308	0.778	0.221	0	Hep2	LOC119588682
0	1.22251	0.926	0.57	0	Hep2	LOC119587754
0	1.22221	0.987	0.744	0	Hep2	LOC119588543
0	1.2209	0.695	0.165	0	Hep2	LOC119585731
0	1.21759	0.964	0.623	0	Hep2	LOC119572381
0	1.21589	0.62	0.152	0	Hep2	LOC119582004
0	1.2004	0.998	0.843	0	Hep2	LOC119582797
0	1.19463	0.771	0.162	0	Hep2	LOC119578932
0	1.18953	0.891	0.379	0	Hep2	LOC119597867
0	1.18907	0.883	0.342	0	Hep2	LOC119592856
0	1.17926	0.987	0.899	0	Hep2	LOC119584242
0	1.1792	0.654	0.151	0	Hep2	LOC119574633
0	1.17912	0.68	0.191	0	Hep2	LOC119597598
0	1.17229	0.696	0.194	0	Hep2	LOC119598147
0	1.16984	0.748	0.142	0	Hep2	LOC119585611
0	1.1657	0.881	0.405	0	Hep2	LOC119575830
0	1.15552	0.68	0.091	0	Hep2	LOC119590844
0	1.15497	0.432	0.041	0	Hep2	LOC119588388
0	1.11576	0.795	0.242	0	Hep2	LOC119596860
0	1.11181	0.584	0.102	0	Hep2	LOC119569734
0	1.11163	0.673	0.176	0	Hep2	LOC119587174
0	1.10932	0.729	0.134	0	Hep2	LOC119574405
0	1.1083	0.815	0.255	0	Hep2	LOC119579343
0	1.10165	0.877	0.401	0	Hep2	LOC119581825
0	1.09775	0.311	0.021	0	Hep2	LOC119577975
0	1.09374	0.925	0.472	0	Hep2	LOC119597279
0	1.088	0.708	0.167	0	Hep2	LOC119589870
0	1.06743	0.798	0.238	0	Hep2	LOC119599180
0	1.05506	0.848	0.256	0	Hep2	LOC119598211
0	1.05376	0.846	0.296	0	Hep2	LOC119584405
0	1.05349	0.868	0.309	0	Hep2	LOC119589092
0	1.05197	0.942	0.512	0	Hep2	LOC119576399
0	1.0457	0.783	0.191	0	Hep2	LOC119585931
0	1.03116	0.87	0.362	0	Hep2	LOC119580381
0	1.02864	0.77	0.175	0	Hep2	LOC119573070
0	1.01729	0.654	0.149	0	Hep2	LOC119599370
0	1.01652	0.776	0.227	0	Hep2	LOC119594183
0	1.01313	0.689	0.121	0	Hep2	LOC119596351
0	1.00653	0.895	0.486	0	Hep2	LOC119585050
0	0.99781	0.888	0.324	0	Hep2	LOC119589047
0	0.996732	0.321	0.036	0	Hep2	LOC119589921
0	0.991025	0.475	0.051	0	Hep2	LOC119592732
0	0.98954	0.743	0.26	0	Hep2	LOC119583664
0	0.988537	0.803	0.23	0	Hep2	LOC119572409
0	0.977801	0.931	0.568	0	Hep2	LOC119576137
0	0.97194	0.441	0.077	0	Hep2	LOC119575290
0	0.967969	0.667	0.146	0	Hep2	LOC119590709
0	0.967938	0.763	0.204	0	Hep2	LOC119596532
0	0.965137	0.934	0.592	0	Hep2	LOC119597040
0	0.963221	0.96	0.728	0	Hep2	LOC119580164
0	0.952658	0.492	0.094	0	Hep2	LOC119590606
0	0.949705	0.936	0.549	0	Hep2	LOC119586470
0	0.945874	0.427	0.072	0	Hep2	LOC119568188
0	0.942391	0.904	0.446	0	Hep2	LOC119580875
0	0.936265	0.719	0.134	0	Hep2	LOC119580004
0	0.936142	0.895	0.485	0	Hep2	LOC119582436
0	0.933257	0.623	0.164	0	Hep2	LOC119582839
0	0.928295	0.853	0.364	0	Hep2	LOC119577556
0	0.924514	0.86	0.377	0	Hep2	LOC119577877
0	0.922851	0.881	0.37	0	Hep2	LOC119595584
0	0.920656	0.791	0.27	0	Hep2	LOC119589704
0	0.914195	0.82	0.303	0	Hep2	LOC119579448
0	0.905892	0.655	0.105	0	Hep2	LOC119580287
0	0.902315	0.8	0.283	0	Hep2	LOC119583471
0	0.901893	0.9	0.459	0	Hep2	LOC119580411
0	0.891554	0.799	0.277	0	Hep2	LOC119574574
0	0.888621	0.68	0.178	0	Hep2	LOC119573612
0	0.885874	0.931	0.58	0	Hep2	LOC119570149
0	0.885265	0.973	0.655	0	Hep2	LOC119598223
0	0.881961	0.901	0.455	0	Hep2	LOC119579306
0	0.881174	0.948	0.586	0	Hep2	LOC119572405
0	0.880478	0.761	0.184	0	Hep2	LOC119582668
0	0.879946	0.87	0.355	0	Hep2	LOC119579409
0	0.878559	0.932	0.628	0	Hep2	LOC119585127
0	0.87577	0.612	0.154	0	Hep2	LOC119579463
0	0.874341	0.913	0.501	0	Hep2	LOC119583459
0	0.872308	0.673	0.13	0	Hep2	LOC119578010
0	0.871017	0.7	0.171	0	Hep2	LOC119579280
0	0.86384	0.259	0.01	0	Hep2	LOC119581173
0	0.863607	0.833	0.331	0	Hep2	LOC119588224
0	0.860118	0.796	0.278	0	Hep2	LOC119574204
0	0.860116	0.643	0.17	0	Hep2	LOC119593042
0	0.856286	0.66	0.123	0	Hep2	LOC119596355
0	0.855705	0.721	0.203	0	Hep2	LOC119597472
0	0.84889	0.802	0.327	0	Hep2	LOC119597839
0	0.844702	0.997	0.916	0	Hep2	LOC119588668
0	0.842157	0.8	0.278	0	Hep2	LOC119581861
0	0.835581	0.554	0.075	0	Hep2	LOC119577872
0	0.82095	0.85	0.322	0	Hep2	LOC119580107
0	0.818494	0.895	0.487	0	Hep2	LOC119589842
0	0.815422	0.687	0.132	0	Hep2	LOC119583077
0	0.814076	0.312	0.041	0	Hep2	LOC119598596
0	0.814047	0.906	0.601	0	Hep2	LOC119593663
0	0.807912	0.552	0.111	0	Hep2	LOC119592532
0	0.799535	0.593	0.166	0	Hep2	LOC119594273
0	0.797867	0.984	0.783	0	Hep2	LOC119589497
0	0.796429	0.879	0.463	0	Hep2	LOC119572218
0	0.795291	0.818	0.312	0	Hep2	LOC119597765
0	0.790236	0.441	0.06	0	Hep2	LOC119592604
0	0.788977	0.623	0.106	0	Hep2	LOC119582480
0	0.788308	0.248	0.005	0	Hep2	LOC119585489
0	0.787	0.852	0.365	0	Hep2	LOC119584397
0	0.786998	0.366	0.048	0	Hep2	LOC119595431
0	0.786552	0.47	0.05	0	Hep2	LOC119585080
0	0.785536	0.317	0.027	0	Hep2	LOC119580265
0	0.785426	0.893	0.452	0	Hep2	LOC119572393
0	0.781954	0.539	0.108	0	Hep2	LOC119591456
0	0.778874	0.601	0.089	0	Hep2	LOC119570046
0	0.777792	0.723	0.167	0	Hep2	LOC119585621
0	0.77774	0.768	0.277	0	Hep2	LOC119581031
0	0.774087	0.484	0.06	0	Hep2	LOC119592573
0	0.773712	0.618	0.104	0	Hep2	LOC119581142
0	0.772095	0.759	0.294	0	Hep2	LOC119587949
0	0.771603	0.819	0.318	0	Hep2	LOC119590548
0	0.770737	0.827	0.307	0	Hep2	LOC119586957
0	0.768323	0.449	0.04	0	Hep2	LOC119576384
0	0.763662	0.91	0.632	0	Hep2	LOC119581974
0	0.76298	0.459	0.121	0	Hep2	LOC119575035
0	0.762927	0.68	0.187	0	Hep2	LOC119587697
0	0.760414	0.893	0.572	0	Hep2	LOC119589824
0	0.758398	0.392	0.038	0	Hep2	LOC119587864
0	0.757905	0.428	0.079	0	Hep2	LOC119578802
0	0.748155	0.914	0.593	0	Hep2	LOC119584363
0	0.746617	0.67	0.181	0	Hep2	LOC119590845
0	0.741398	0.737	0.22	0	Hep2	LOC119593000
0	0.739953	0.317	0.024	0	Hep2	LOC119581114
0	0.739795	0.642	0.173	0	Hep2	LOC119580817
0	0.736048	0.506	0.084	0	Hep2	LOC119593818
0	0.733812	0.65	0.149	0	Hep2	LOC119580315
0	0.732653	0.772	0.265	0	Hep2	LOC119574929
0	0.732289	0.584	0.088	0	Hep2	LOC119581118
0	0.728798	0.323	0.035	0	Hep2	LOC119569828
0	0.72188	0.763	0.351	0	Hep2	LOC119568421
0	0.718401	0.988	0.794	0	Hep2	LOC119595458
0	0.718319	0.77	0.264	0	Hep2	LOC119595189
0	0.715318	0.699	0.214	0	Hep2	LOC119594185
0	0.714762	0.744	0.22	0	Hep2	LOC119577895
0	0.706554	0.595	0.131	0	Hep2	LOC119591467
0	0.705937	0.326	0.054	0	Hep2	LOC119587743
0	0.701236	0.547	0.076	0	Hep2	LOC119595418
0	0.701055	0.847	0.467	0	Hep2	LOC119588569
0	0.699862	0.956	0.715	0	Hep2	LOC119573208
0	0.699735	0.282	0.044	0	Hep2	LOC119597575
0	0.698771	0.58	0.125	0	Hep2	LOC119586349
0	0.698265	0.621	0.129	0	Hep2	LOC119574883
0	0.697681	0.812	0.324	0	Hep2	LOC119581965
0	0.696661	0.349	0.037	0	Hep2	LOC119598141
0	0.692951	0.987	0.847	0	Hep2	LOC119583648
0	0.691885	0.876	0.453	0	Hep2	LOC119581053
0	0.690915	0.514	0.071	0	Hep2	LOC119588768
0	0.690647	0.681	0.195	0	Hep2	LOC119568393
0	0.688574	0.518	0.084	0	Hep2	LOC119594181
0	0.685945	0.457	0.066	0	Hep2	LOC119597216
0	0.682594	0.806	0.282	0	Hep2	LOC119598958
0	0.680072	0.861	0.41	0	Hep2	LOC119598551
0	0.6789	0.551	0.092	0	Hep2	LOC119589700
0	0.678806	0.978	0.812	0	Hep2	LOC119594415
0	0.67838	0.8	0.332	0	Hep2	LOC119581003
0	0.677711	0.916	0.566	0	Hep2	LOC119594595
0	0.677486	0.472	0.064	0	Hep2	LOC119584396
0	0.677413	0.484	0.07	0	Hep2	LOC119577094
0	0.677063	0.819	0.401	0	Hep2	LOC119592762
0	0.674025	0.794	0.265	0	Hep2	LOC119583761
0	0.672623	0.709	0.202	0	Hep2	LOC119572411
0	0.67096	0.916	0.653	0	Hep2	LOC119575479
0	0.669405	0.693	0.202	0	Hep2	LOC119595448
0	0.667542	0.57	0.114	0	Hep2	LOC119577810
0	0.666936	0.794	0.325	0	Hep2	LOC119596164
0	0.66516	0.962	0.692	0	Hep2	LOC119584283
0	0.663863	0.809	0.354	0	Hep2	LOC119576116
0	0.660179	0.685	0.229	0	Hep2	LOC119599466
0	0.657946	0.215	0.009	0	Hep2	LOC119592775
0	0.651499	0.68	0.187	0	Hep2	LOC119584439
0	0.651359	0.86	0.427	0	Hep2	LOC119592684
0	0.650207	0.906	0.563	0	Hep2	LOC119580271
0	0.645213	0.867	0.436	0	Hep2	LOC119577139
0	0.643805	0.591	0.164	0	Hep2	LOC119571067
0	0.643226	0.495	0.062	0	Hep2	LOC119598711
0	0.641992	0.549	0.12	0	Hep2	LOC119592949
0	0.641783	0.651	0.193	0	Hep2	LOC119587077
0	0.635348	0.855	0.47	0	Hep2	LOC119585783
0	0.63525	0.765	0.258	0	Hep2	LOC119597505
0	0.632838	0.563	0.159	0	Hep2	LOC119591502
0	0.632714	0.355	0.035	0	Hep2	LOC119574610
0	0.63269	0.643	0.164	0	Hep2	LOC119583698
0	0.629487	0.942	0.711	0	Hep2	LOC119580084
0	0.626054	0.859	0.397	0	Hep2	LOC119582704
0	0.62328	0.903	0.549	0	Hep2	LOC119586966
0	0.621423	0.98	0.816	0	Hep2	LOC119587996
0	0.621044	0.649	0.151	0	Hep2	LOC119598111
0	0.620681	0.921	0.504	0	Hep2	LOC119594788
0	0.617945	0.45	0.113	0	Hep2	LOC119579627
0	0.616714	0.527	0.097	0	Hep2	LOC119583746
0	0.616598	0.365	0.028	0	Hep2	LOC119595005
0	0.614772	0.537	0.168	0	Hep2	LOC119595069
0	0.610294	0.523	0.075	0	Hep2	LOC119594708
0	0.609515	0.298	0.05	0	Hep2	LOC119582473
0	0.608492	0.838	0.422	0	Hep2	LOC119596945
0	0.606539	0.582	0.141	0	Hep2	LOC119590384
0	0.605285	0.908	0.683	0	Hep2	LOC119591270
0	0.605004	0.548	0.093	0	Hep2	LOC119584702
0	0.601121	0.757	0.334	0	Hep2	LOC119584472
0	0.598437	0.798	0.313	0	Hep2	LOC119579449
0	0.594143	0.441	0.096	0	Hep2	LOC119586992
0	0.593571	0.635	0.149	0	Hep2	LOC119598517
0	0.593386	0.588	0.112	0	Hep2	LOC119594106
0	0.593019	0.697	0.233	0	Hep2	LOC119598174
0	0.592987	0.655	0.181	0	Hep2	LOC119587757
0	0.591771	0.465	0.065	0	Hep2	LOC119575233
0	0.590305	0.607	0.155	0	Hep2	LOC119598195
0	0.584002	0.437	0.076	0	Hep2	LOC119582875
0	0.582577	0.528	0.114	0	Hep2	LOC119595718
0	0.582501	0.738	0.284	0	Hep2	LOC119594028
0	0.582113	0.91	0.643	0	Hep2	LOC119593022
0	0.57952	0.424	0.049	0	Hep2	LOC119595220
0	0.577061	0.81	0.314	0	Hep2	LOC119572881
0	0.576919	0.471	0.102	0	Hep2	LOC119585102
0	0.576857	0.515	0.113	0	Hep2	LOC119568047
0	0.573314	0.539	0.125	0	Hep2	LOC119593372
0	0.571049	0.181	0.01	0	Hep2	LOC119579242
0	0.564874	0.625	0.157	0	Hep2	LOC119594784
0	0.56153	0.537	0.101	0	Hep2	LOC119587031
0	0.559915	0.494	0.1	0	Hep2	LOC119594111
0	0.559685	0.236	0.02	0	Hep2	LOC119576108
0	0.557894	0.486	0.1	0	Hep2	LOC119578883
0	0.555747	0.401	0.082	0	Hep2	LOC119580910
0	0.555583	0.628	0.169	0	Hep2	LOC119590677
0	0.554847	0.464	0.1	0	Hep2	LOC119586953
0	0.554124	0.623	0.167	0	Hep2	LOC119579502
0	0.55407	0.826	0.401	0	Hep2	LOC119590069
0	0.552453	0.714	0.225	0	Hep2	LOC119573091
0	0.55232	0.423	0.055	0	Hep2	LOC119582360
0	0.549305	0.69	0.229	0	Hep2	LOC119592871
0	0.546083	0.689	0.26	0	Hep2	LOC119593698
0	0.544774	0.259	0.016	0	Hep2	LOC119592603
0	0.544585	0.821	0.389	0	Hep2	LOC119596827
0	0.543973	0.587	0.165	0	Hep2	LOC119594389
0	0.542979	0.755	0.314	0	Hep2	LOC119590165
0	0.542339	0.725	0.252	0	Hep2	LOC119574895
0	0.542186	0.573	0.14	0	Hep2	LOC119576722
0	0.539819	0.88	0.438	0	Hep2	LOC119574361
0	0.538226	0.64	0.191	0	Hep2	LOC119586337
0	0.538003	0.463	0.084	0	Hep2	LOC119594751
0	0.536983	0.426	0.083	0	Hep2	LOC119587072
0	0.536963	0.32	0.039	0	Hep2	LOC119584722
0	0.535155	0.566	0.112	0	Hep2	LOC119584827
0	0.533199	0.824	0.367	0	Hep2	LOC119598244
0	0.530831	0.249	0.029	0	Hep2	LOC119593085
0	0.529419	0.353	0.067	0	Hep2	LOC119589079
0	0.529258	0.308	0.075	0	Hep2	LOC119580984
0	0.527569	0.402	0.061	0	Hep2	LOC119589491
0	0.526464	0.774	0.314	0	Hep2	LOC119582788
0	0.526449	0.625	0.161	0	Hep2	LOC119599324
0	0.526425	0.712	0.316	0	Hep2	LOC119582537
0	0.524469	0.753	0.305	0	Hep2	LOC119579870
0	0.518601	0.401	0.063	0	Hep2	LOC119580401
0	0.517436	0.6	0.177	0	Hep2	LOC119579278
0	0.517074	0.72	0.314	0	Hep2	LOC119573368
0	0.517011	0.961	0.632	0	Hep2	LOC119579471
0	0.516363	0.605	0.252	0	Hep2	LOC119596950
0	0.513343	0.224	0.016	0	Hep2	LOC119598657
0	0.513116	0.597	0.138	0	Hep2	LOC119574186
0	0.512106	0.454	0.056	0	Hep2	LOC119586696
0	0.510573	0.447	0.081	0	Hep2	LOC119597775
0	0.508477	0.688	0.238	0	Hep2	LOC119597332
0	0.508183	0.712	0.244	0	Hep2	LOC119579276
0	0.505082	0.296	0.044	0	Hep2	LOC119579464
0	0.504973	0.395	0.046	0	Hep2	LOC119591468
0	0.503834	0.549	0.22	0	Hep2	LOC119574941
0	0.50364	0.645	0.175	0	Hep2	LOC119584385
0	0.502745	0.33	0.039	0	Hep2	LOC119593704
0	0.501216	0.31	0.042	0	Hep2	LOC119571615
0	0.499943	0.94	0.766	0	Hep2	LOC119574978
0	0.499206	0.423	0.083	0	Hep2	LOC119577494
0	0.497033	0.475	0.117	0	Hep2	LOC119585888
0	0.496493	0.836	0.43	0	Hep2	LOC119596989
0	0.496129	0.759	0.316	0	Hep2	LOC119568422
0	0.494746	0.657	0.219	0	Hep2	LOC119578079
0	0.493258	0.671	0.292	0	Hep2	LOC119590670
0	0.49296	0.579	0.195	0	Hep2	LOC119584366
0	0.492216	0.551	0.125	0	Hep2	LOC119597590
0	0.491348	0.471	0.159	0	Hep2	LOC119575186
0	0.488066	0.4	0.058	0	Hep2	LOC119593849
0	0.486841	0.533	0.098	0	Hep2	LOC119593490
0	0.485719	0.444	0.094	0	Hep2	LOC119590411
0	0.483879	0.836	0.349	0	Hep2	LOC119597066
0	0.482113	0.445	0.104	0	Hep2	LOC119582678
0	0.48112	0.743	0.318	0	Hep2	LOC119574135
0	0.47986	0.279	0.032	0	Hep2	LOC119569013
0	0.476676	0.489	0.073	0	Hep2	LOC119578146
0	0.475202	0.811	0.403	0	Hep2	LOC119570358
0	0.47189	0.476	0.123	0	Hep2	LOC119574185
0	0.471601	0.464	0.084	0	Hep2	LOC119574346
0	0.471025	0.45	0.078	0	Hep2	LOC119583358
0	0.468468	0.578	0.14	0	Hep2	LOC119588761
0	0.466949	0.344	0.049	0	Hep2	LOC119573374
0	0.466177	0.998	0.991	0	Hep2	LOC119593484
0	0.465631	0.286	0.05	0	Hep2	LOC119584994
0	0.459414	0.629	0.188	0	Hep2	LOC119572369
0	0.458445	0.402	0.064	0	Hep2	LOC119592525
0	0.458079	0.411	0.099	0	Hep2	LOC119585827
0	0.456449	0.693	0.277	0	Hep2	LOC119597643
0	0.455608	0.73	0.265	0	Hep2	LOC119568966
0	0.45433	0.496	0.11	0	Hep2	LOC119581700
0	0.454204	0.399	0.069	0	Hep2	LOC119594739
0	0.454032	0.352	0.045	0	Hep2	LOC119582386
0	0.44761	0.504	0.113	0	Hep2	LOC119597907
0	0.446888	0.651	0.208	0	Hep2	LOC119585557
0	0.446187	0.566	0.132	0	Hep2	LOC119593020
0	0.445869	0.595	0.152	0	Hep2	LOC119581964
0	0.445345	0.277	0.037	0	Hep2	LOC119587089
0	0.442621	0.516	0.133	0	Hep2	LOC119582844
0	0.442109	0.572	0.163	0	Hep2	LOC119573221
0	0.441154	0.469	0.114	0	Hep2	LOC119578935
0	0.440015	0.446	0.11	0	Hep2	LOC119588540
0	0.4382	0.445	0.091	0	Hep2	LOC119581731
0	0.437774	0.291	0.083	0	Hep2	LOC119582812
0	0.437262	0.566	0.121	0	Hep2	LOC119577841
0	0.434683	0.437	0.099	0	Hep2	LOC119578829
0	0.434673	0.387	0.07	0	Hep2	LOC119598956
0	0.434038	0.718	0.249	0	Hep2	LOC119573948
0	0.433343	0.345	0.052	0	Hep2	LOC119591905
0	0.430667	0.656	0.206	0	Hep2	LOC119577083
0	0.4296	0.442	0.088	0	Hep2	LOC119588083
0	0.429542	0.631	0.212	0	Hep2	LOC119570153
0	0.429522	0.34	0.053	0	Hep2	LOC119590080
0	0.429477	0.446	0.11	0	Hep2	LOC119589912
0	0.427429	0.373	0.076	0	Hep2	LOC119579196
0	0.426922	0.429	0.079	0	Hep2	LOC119575646
0	0.424748	0.769	0.35	0	Hep2	LOC119582727
0	0.424316	0.301	0.026	0	Hep2	LOC119586357
0	0.423913	0.381	0.083	0	Hep2	LOC119589202
0	0.422671	0.642	0.241	0	Hep2	LOC119591587
0	0.420974	0.419	0.103	0	Hep2	LOC119590014
0	0.420619	0.928	0.575	0	Hep2	LOC119569537
0	0.420568	0.489	0.082	0	Hep2	LOC119590707
0	0.420062	0.44	0.08	0	Hep2	LOC119585075
0	0.419163	0.49	0.137	0	Hep2	LOC119595041
0	0.418926	0.591	0.195	0	Hep2	LOC119596106
0	0.418732	0.652	0.207	0	Hep2	LOC119598564
0	0.416711	0.538	0.119	0	Hep2	LOC119586259
0	0.416201	0.321	0.046	0	Hep2	LOC119576435
0	0.415942	0.593	0.173	0	Hep2	LOC119591169
0	0.415782	0.399	0.078	0	Hep2	LOC119580836
0	0.415047	0.565	0.148	0	Hep2	LOC119574219
0	0.412895	0.397	0.066	0	Hep2	LOC119587052
0	0.412512	0.337	0.055	0	Hep2	LOC119592026
0	0.41084	0.276	0.054	0	Hep2	LOC119597675
0	0.409318	0.653	0.243	0	Hep2	LOC119577124
0	0.408963	0.585	0.174	0	Hep2	LOC119588560
0	0.408875	0.442	0.117	0	Hep2	LOC119584192
0	0.40382	0.434	0.121	0	Hep2	LOC119579773
0	0.399231	0.537	0.14	0	Hep2	LOC119579293
0	0.398017	0.618	0.179	0	Hep2	LOC119594180
0	0.398007	0.343	0.074	0	Hep2	LOC119591297
0	0.397434	0.684	0.28	0	Hep2	LOC119582461
0	0.396879	0.454	0.114	0	Hep2	LOC119585229
0	0.396599	0.781	0.343	0	Hep2	LOC119576094
0	0.396347	0.323	0.036	0	Hep2	LOC119576805
0	0.395683	0.232	0.033	0	Hep2	LOC119584451
0	0.395636	0.448	0.097	0	Hep2	LOC119577192
0	0.395599	0.495	0.088	0	Hep2	LOC119582632
0	0.395584	0.941	0.691	0	Hep2	LOC119586462
0	0.394503	0.284	0.028	0	Hep2	LOC119576990
0	0.393991	0.241	0.026	0	Hep2	LOC119572208
0	0.393954	0.336	0.093	0	Hep2	LOC119579475
0	0.393603	0.521	0.133	0	Hep2	LOC119580289
0	0.393365	0.358	0.052	0	Hep2	LOC119596742
0	0.392802	0.389	0.085	0	Hep2	LOC119583740
0	0.39207	0.317	0.033	0	Hep2	LOC119584310
0	0.391057	0.421	0.068	0	Hep2	LOC119589069
0	0.389993	0.53	0.146	0	Hep2	LOC119589835
0	0.389545	0.639	0.213	0	Hep2	LOC119579497
0	0.389176	0.245	0.032	0	Hep2	LOC119598611
0	0.387733	0.556	0.144	0	Hep2	LOC119588512
0	0.386229	0.443	0.094	0	Hep2	LOC119584458
0	0.386146	0.236	0.055	0	Hep2	LOC119573267
0	0.385602	0.575	0.166	0	Hep2	LOC119569640
0	0.384804	0.391	0.101	0	Hep2	LOC119573377
0	0.38421	0.166	0.008	0	Hep2	LOC119584965
0	0.382716	0.429	0.096	0	Hep2	LOC119572235
0	0.38262	0.606	0.233	0	Hep2	LOC119581621
0	0.381756	0.288	0.062	0	Hep2	LOC119577269
0	0.38058	0.483	0.139	0	Hep2	LOC119592069
0	0.380236	0.36	0.046	0	Hep2	LOC119589045
0	0.379546	0.42	0.103	0	Hep2	LOC119596735
0	0.379314	0.547	0.155	0	Hep2	LOC119575407
0	0.377612	0.61	0.2	0	Hep2	LOC119574935
0	0.376725	0.812	0.421	0	Hep2	LOC119584563
0	0.37628	0.436	0.106	0	Hep2	LOC119595024
0	0.374117	0.48	0.088	0	Hep2	LOC119596937
0	0.37338	0.24	0.031	0	Hep2	LOC119595449
0	0.372768	0.5	0.115	0	Hep2	LOC119578715
0	0.37072	0.302	0.033	0	Hep2	LOC119588615
0	0.369303	0.233	0.034	0	Hep2	LOC119579320
0	0.368444	0.701	0.245	0	Hep2	LOC119580238
0	0.366107	0.598	0.211	0	Hep2	LOC119583812
0	0.363714	0.621	0.207	0	Hep2	LOC119593946
0	0.363627	0.572	0.181	0	Hep2	LOC119568208
0	0.363592	0.385	0.081	0	Hep2	LOC119593931
0	0.363015	0.353	0.102	0	Hep2	LOC119583611
0	0.36204	0.55	0.137	0	Hep2	LOC119578153
0	0.361901	0.707	0.272	0	Hep2	LOC119578760
0	0.361372	0.458	0.123	0	Hep2	LOC119582631
0	0.360252	0.381	0.101	0	Hep2	LOC119597786
0	0.359008	0.485	0.104	0	Hep2	LOC119578414
0	0.358967	0.803	0.351	0	Hep2	LOC119597666
0	0.358462	0.379	0.067	0	Hep2	LOC119576415
0	0.357202	0.705	0.32	0	Hep2	LOC119596326
0	0.356666	0.671	0.26	0	Hep2	LOC119594272
0	0.356529	0.972	0.776	0	Hep2	LOC119579322
0	0.356324	0.681	0.286	0	Hep2	LOC119578684
0	0.356168	0.278	0.05	0	Hep2	LOC119588592
0	0.355702	0.294	0.045	0	Hep2	LOC119591938
0	0.353628	0.378	0.074	0	Hep2	LOC119592748
0	0.353302	0.556	0.176	0	Hep2	LOC119595766
0	0.35255	0.49	0.137	0	Hep2	LOC119575363
0	0.350602	0.182	0.027	0	Hep2	LOC119593686
0	0.350534	0.362	0.064	0	Hep2	LOC119575126
0	0.34725	0.381	0.096	0	Hep2	LOC119587801
0	0.346548	0.348	0.063	0	Hep2	LOC119598681
0	0.346239	0.285	0.03	0	Hep2	LOC119569817
0	0.345845	0.432	0.101	0	Hep2	LOC119596103
0	0.343487	0.689	0.278	0	Hep2	LOC119583806
0	0.343375	0.458	0.147	0	Hep2	LOC119577822
0	0.343302	0.55	0.191	0	Hep2	LOC119582772
0	0.34329	0.478	0.106	0	Hep2	LOC119594699
0	0.343124	0.511	0.175	0	Hep2	LOC119575023
0	0.342587	0.542	0.163	0	Hep2	LOC119592692
0	0.341177	0.316	0.041	0	Hep2	LOC119586431
0	0.339911	0.266	0.047	0	Hep2	LOC119598479
0	0.339592	0.569	0.187	0	Hep2	LOC119588595
0	0.339406	0.555	0.164	0	Hep2	LOC119568378
0	0.338788	0.211	0.019	0	Hep2	LOC119589282
0	0.337931	0.541	0.172	0	Hep2	LOC119593559
0	0.337085	0.48	0.14	0	Hep2	LOC119583751
0	0.336831	0.323	0.065	0	Hep2	LOC119572896
0	0.33603	0.239	0.023	0	Hep2	LOC119593370
0	0.335879	0.382	0.109	0	Hep2	LOC119580840
0	0.334456	0.419	0.122	0	Hep2	LOC119572560
0	0.33413	0.403	0.088	0	Hep2	LOC119595548
0	0.333929	0.703	0.295	0	Hep2	LOC119597169
0	0.333586	0.313	0.053	0	Hep2	LOC119596978
0	0.332768	0.711	0.282	0	Hep2	LOC119597706
0	0.330826	0.684	0.28	0	Hep2	LOC119582868
0	0.330067	0.342	0.058	0	Hep2	LOC119579261
0	0.329998	0.529	0.171	0	Hep2	LOC119581105
0	0.328978	0.292	0.038	0	Hep2	LOC119584430
0	0.32799	0.43	0.152	0	Hep2	LOC119582682
0	0.327614	0.378	0.09	0	Hep2	LOC119598636
0	0.326869	0.653	0.303	0	Hep2	LOC119596951
0	0.326643	0.428	0.079	0	Hep2	LOC119587085
0	0.326117	0.686	0.298	0	Hep2	LOC119580402
0	0.324711	0.588	0.194	0	Hep2	LOC119597600
0	0.324614	0.607	0.207	0	Hep2	LOC119597444
0	0.3242	0.346	0.046	0	Hep2	LOC119582075
0	0.323888	0.337	0.075	0	Hep2	LOC119575029
0	0.323688	0.416	0.093	0	Hep2	LOC119589147
0	0.323559	0.447	0.138	0	Hep2	LOC119574398
0	0.323251	0.647	0.26	0	Hep2	LOC119575299
0	0.323135	0.263	0.039	0	Hep2	LOC119584565
0	0.322895	0.23	0.021	0	Hep2	LOC119582596
0	0.322315	0.737	0.359	0	Hep2	LOC119570429
0	0.321146	0.474	0.113	0	Hep2	LOC119574395
0	0.320959	0.72	0.283	0	Hep2	LOC119574128
0	0.320347	0.593	0.193	0	Hep2	LOC119594558
0	0.319421	0.294	0.048	0	Hep2	LOC119582851
0	0.318766	0.619	0.271	0	Hep2	LOC119585712
0	0.318701	0.198	0.016	0	Hep2	LOC119580480
0	0.318652	0.526	0.156	0	Hep2	LOC119580966
0	0.318593	0.518	0.136	0	Hep2	LOC119578867
0	0.317314	0.369	0.062	0	Hep2	LOC119587136
0	0.316709	0.31	0.033	0	Hep2	LOC119593365
0	0.316057	0.763	0.384	0	Hep2	LOC119597204
0	0.315287	0.482	0.153	0	Hep2	LOC119586281
0	0.313942	0.26	0.049	0	Hep2	LOC119574404
0	0.31315	0.463	0.115	0	Hep2	LOC119574884
0	0.312224	0.222	0.043	0	Hep2	LOC119584202
0	0.311339	0.349	0.056	0	Hep2	LOC119587705
0	0.311279	0.276	0.066	0	Hep2	LOC119580373
0	0.309424	0.696	0.275	0	Hep2	LOC119575142
0	0.309335	0.353	0.097	0	Hep2	LOC119581130
0	0.309199	0.416	0.11	0	Hep2	LOC119575389
0	0.308487	0.449	0.102	0	Hep2	LOC119572970
0	0.308048	0.213	0.033	0	Hep2	LOC119585091
0	0.308022	0.488	0.136	0	Hep2	LOC119598586
0	0.305866	0.363	0.08	0	Hep2	LOC119576942
0	0.304805	0.282	0.049	0	Hep2	LOC119570517
0	0.304231	0.313	0.047	0	Hep2	LOC119599320
0	0.30393	0.542	0.151	0	Hep2	LOC119591396
0	0.303865	0.425	0.116	0	Hep2	LOC119580778
0	0.303419	0.308	0.05	0	Hep2	LOC119594707
0	0.303387	0.477	0.134	0	Hep2	LOC119583720
0	0.302479	0.385	0.107	0	Hep2	LOC119596580
0	0.301931	0.279	0.06	0	Hep2	LOC119579891
0	0.300103	0.326	0.074	0	Hep2	LOC119574631
0	0.300034	0.353	0.088	0	Hep2	LOC119574157
0	0.29824	0.548	0.198	0	Hep2	LOC119578810
0	0.29803	0.43	0.122	0	Hep2	LOC119572399
0	0.297387	0.404	0.092	0	Hep2	LOC119597262
0	0.296845	0.313	0.053	0	Hep2	LOC119597607
0	0.295357	0.25	0.027	0	Hep2	LOC119578023
0	0.295194	0.564	0.192	0	Hep2	LOC119593362
0	0.295011	0.504	0.161	0	Hep2	LOC119594719
0	0.294145	0.634	0.236	0	Hep2	LOC119583762
0	0.294077	0.235	0.046	0	Hep2	LOC119583610
0	0.293577	0.297	0.057	0	Hep2	LOC119574139
0	0.293355	0.354	0.071	0	Hep2	LOC119594059
0	0.293299	0.331	0.06	0	Hep2	LOC119596497
0	0.292445	0.549	0.169	0	Hep2	LOC119597060
0	0.291865	0.169	0.021	0	Hep2	LOC119574320
0	0.291656	0.64	0.216	0	Hep2	LOC119570990
0	0.291625	0.535	0.178	0	Hep2	LOC119576395
0	0.289787	0.381	0.091	0	Hep2	LOC119590756
0	0.289148	0.684	0.25	0	Hep2	LOC119584475
0	0.287313	0.584	0.189	0	Hep2	LOC119573590
0	0.287123	0.622	0.232	0	Hep2	LOC119596293
0	0.286422	0.513	0.155	0	Hep2	LOC119580338
0	0.286261	0.595	0.211	0	Hep2	LOC119575212
0	0.285209	0.602	0.212	0	Hep2	LOC119582846
0	0.284985	0.157	0.007	0	Hep2	LOC119596287
0	0.284358	0.427	0.122	0	Hep2	LOC119594952
0	0.283341	0.646	0.256	0	Hep2	LOC119580002
0	0.28194	0.324	0.053	0	Hep2	LOC119584204
0	0.281921	0.318	0.068	0	Hep2	LOC119597653
0	0.281867	0.366	0.071	0	Hep2	LOC119576986
0	0.281655	0.381	0.086	0	Hep2	LOC119580684
0	0.280099	0.248	0.041	0	Hep2	LOC119599246
0	0.278728	0.649	0.27	0	Hep2	LOC119597875
0	0.278269	0.36	0.1	0	Hep2	LOC119580967
0	0.278143	0.334	0.066	0	Hep2	LOC119594991
0	0.278121	0.365	0.079	0	Hep2	LOC119585253
0	0.277947	0.274	0.046	0	Hep2	LOC119575263
0	0.277763	0.46	0.145	0	Hep2	LOC119597324
0	0.277301	0.352	0.089	0	Hep2	LOC119579384
0	0.27663	0.325	0.067	0	Hep2	LOC119598744
0	0.276529	0.547	0.215	0	Hep2	LOC119593033
0	0.276471	0.406	0.12	0	Hep2	LOC119579585
0	0.275805	0.514	0.166	0	Hep2	LOC119570569
0	0.275206	0.327	0.093	0	Hep2	LOC119591492
0	0.274903	0.513	0.159	0	Hep2	LOC119572882
0	0.274727	0.394	0.083	0	Hep2	LOC119589067
0	0.274125	0.535	0.15	0	Hep2	LOC119578689
0	0.273927	0.734	0.333	0	Hep2	LOC119578126
0	0.273486	0.721	0.327	0	Hep2	LOC119574463
0	0.273304	0.352	0.073	0	Hep2	LOC119591436
0	0.273146	0.34	0.07	0	Hep2	LOC119588589
0	0.272507	0.211	0.023	0	Hep2	LOC119594019
0	0.271898	0.385	0.064	0	Hep2	LOC119591983
0	0.270453	0.302	0.061	0	Hep2	LOC119589244
0	0.27037	0.503	0.163	0	Hep2	LOC119584238
0	0.269499	0.578	0.203	0	Hep2	LOC119585833
0	0.269298	0.475	0.126	0	Hep2	LOC119575522
0	0.2679	0.47	0.135	0	Hep2	LOC119576180
0	0.266385	0.283	0.038	0	Hep2	LOC119581019
0	0.265838	0.235	0.028	0	Hep2	LOC119588602
0	0.265739	0.245	0.045	0	Hep2	LOC119582240
0	0.265613	0.396	0.103	0	Hep2	LOC119588789
0	0.265598	0.693	0.293	0	Hep2	LOC119590066
0	0.265093	0.313	0.059	0	Hep2	LOC119572407
0	0.264971	0.255	0.056	0	Hep2	LOC119589149
0	0.263966	0.583	0.191	0	Hep2	LOC119574187
0	0.263641	0.432	0.125	0	Hep2	LOC119576058
0	0.263606	0.265	0.051	0	Hep2	LOC119597326
0	0.262958	0.396	0.122	0	Hep2	LOC119593093
0	0.262944	0.406	0.108	0	Hep2	LOC119576342
0	0.262934	0.709	0.282	0	Hep2	LOC119588579
0	0.26082	0.435	0.116	0	Hep2	LOC119575095
0	0.260457	0.292	0.056	0	Hep2	LOC119585261
0	0.259294	0.358	0.119	0	Hep2	LOC119578504
0	0.256751	0.325	0.077	0	Hep2	LOC119583773
0	0.25656	0.35	0.07	0	Hep2	LOC119594956
0	0.256349	0.566	0.196	0	Hep2	LOC119578879
0	0.255757	0.605	0.23	0	Hep2	LOC119571063
0	0.255311	0.384	0.094	0	Hep2	LOC119586502
0	0.253849	0.15	0.013	0	Hep2	LOC119572209
0	0.252947	0.641	0.252	0	Hep2	LOC119586954
0	0.252867	0.452	0.127	0	Hep2	LOC119584974
0	0.252707	0.343	0.069	0	Hep2	LOC119592887
0	0.252441	0.274	0.066	0	Hep2	LOC119580437
0	0.252441	0.513	0.164	0	Hep2	LOC119568077
0	0.252163	0.53	0.178	0	Hep2	LOC119597603
0	0.251877	0.204	0.04	0	Hep2	LOC119593399
0	0.250841	0.447	0.132	0	Hep2	LOC119596051
1.36365e-295	0.324385	0.67	0.328	2.09771e-291	Hep2	LOC119596475
9.07892e-290	0.335751	0.249	0.067	1.39661e-285	Hep2	LOC119584422
1.38995e-287	0.342875	0.174	0.031	2.13817e-283	Hep2	LOC119595587
2.91751e-286	0.254639	0.804	0.414	4.48801e-282	Hep2	LOC119594972
2.67965e-278	0.253705	0.179	0.035	4.12211e-274	Hep2	LOC119583433
3.54865e-278	0.284828	0.294	0.093	5.4589e-274	Hep2	LOC119596327
7.27156e-275	0.304431	0.258	0.074	1.11858e-270	Hep2	LOC119571426
2.56122e-272	0.259957	0.769	0.39	3.93992e-268	Hep2	LOC119579217
7.13987e-271	0.353261	0.832	0.47	1.09833e-266	Hep2	LOC119586993
9.6436e-267	0.283455	0.154	0.026	1.48348e-262	Hep2	LOC119578807
9.79487e-265	0.485171	0.331	0.113	1.50674e-260	Hep2	LOC119582503
5.58996e-261	0.270802	0.751	0.39	8.59903e-257	Hep2	LOC119582650
7.27722e-261	0.409998	0.208	0.052	1.11946e-256	Hep2	LOC119582638
2.41014e-259	0.308176	0.844	0.488	3.70752e-255	Hep2	LOC119580983
4.79133e-245	0.283278	0.792	0.456	7.3705e-241	Hep2	LOC119575120
2.94164e-240	0.268846	0.662	0.348	4.52513e-236	Hep2	LOC119587752
1.20409e-237	0.649417	0.948	0.819	1.85225e-233	Hep2	LOC119568672
6.61814e-236	0.267588	0.324	0.119	1.01807e-231	Hep2	LOC119586253
8.51336e-236	0.474279	0.984	0.903	1.30961e-231	Hep2	LOC119590397
3.90605e-229	0.277156	0.823	0.466	6.00867e-225	Hep2	LOC119594120
2.7849e-225	0.312523	0.149	0.029	4.28401e-221	Hep2	LOC119584221
6.26926e-202	0.475034	0.989	0.961	9.644e-198	Hep2	LOC119589836
2.83306e-197	0.316013	0.986	0.932	4.3581e-193	Hep2	LOC119585877
2.66628e-195	0.299849	0.988	0.93	4.10154e-191	Hep2	LOC119589496
3.25292e-187	0.264126	0.233	0.082	5.00396e-183	Hep2	LOC119576402
3.43709e-187	1.16202	0.439	0.224	5.28727e-183	Hep2	LOC119584220
6.06931e-185	0.762427	0.934	0.76	9.33642e-181	Hep2	LOC119575180
8.54902e-184	0.318337	0.959	0.862	1.3151e-179	Hep2	LOC119580903
2.00778e-180	0.353944	0.141	0.033	3.08857e-176	Hep2	LOC119589554
1.11285e-175	0.477525	0.826	0.612	1.71189e-171	Hep2	LOC119588723
6.03037e-165	0.257551	0.983	0.979	9.27652e-161	Hep2	LOC119595388
6.95882e-165	0.27943	0.895	0.637	1.07048e-160	Hep2	LOC119586380
1.02395e-144	0.323991	0.915	0.628	1.57515e-140	Hep2	LOC119578815
2.94245e-134	0.267661	0.912	0.679	4.52638e-130	Hep2	LOC119576706
1.96446e-133	0.315253	0.981	0.906	3.02193e-129	Hep2	LOC119575302
7.15564e-125	0.445322	0.992	0.947	1.10075e-120	Hep2	LOC119578142
1.52657e-121	0.587031	0.526	0.345	2.34832e-117	Hep2	LOC119575179
9.35565e-115	0.350343	0.98	0.908	1.43918e-110	Hep2	LOC119595809
9.44461e-112	0.464893	0.686	0.486	1.45286e-107	Hep2	LOC119575187
3.33945e-99	0.812731	0.527	0.35	5.13707e-95	Hep2	LOC119576125
2.59278e-98	0.280246	0.978	0.812	3.98847e-94	Hep2	LOC119597152
7.67657e-87	0.332154	0.864	0.71	1.18089e-82	Hep2	LOC119575181
3.45109e-79	0.26964	0.976	0.936	5.30881e-75	Hep2	LOC119587191
1.34707e-71	0.799907	0.367	0.229	2.07219e-67	Hep2	LOC119584222
9.44844e-65	0.250988	0.976	0.914	1.45345e-60	Hep2	LOC119582520
2.52862e-51	0.896804	0.452	0.359	3.88977e-47	Hep2	LOC119584605
2.39853e-47	0.667939	0.378	0.265	3.68966e-43	Hep2	LOC119584328
0	6.18552	0.441	0.128	0	Hep3	LOC119594996
0	5.73661	0.28	0.013	0	Hep3	LOC119584358
0	5.45091	0.232	0.017	0	Hep3	LOC119588599
0	5.419	0.368	0.088	0	Hep3	LOC119568446
0	5.17815	0.458	0.145	0	Hep3	LOC119590571
0	4.72223	0.223	0.004	0	Hep3	LOC119584357
0	4.21091	0.268	0.05	0	Hep3	LOC119574958
0	4.16268	0.875	0.069	0	Hep3	LOC119590026
0	4.1108	0.554	0.037	0	Hep3	LOC119578000
0	4.00283	0.19	0.019	0	Hep3	LOC119594995
0	3.98388	0.42	0.11	0	Hep3	LOC119568039
0	3.9411	0.722	0.348	0	Hep3	LOC119576449
0	3.87323	0.18	0.008	0	Hep3	LOC119588600
0	3.8196	0.865	0.418	0	Hep3	LOC119568359
0	3.7273	0.718	0.031	0	Hep3	LOC119584303
0	3.71609	0.96	0.2	0	Hep3	LOC119575160
0	3.70732	0.47	0.124	0	Hep3	LOC119596883
0	3.53893	0.66	0.214	0	Hep3	LOC119596884
0	3.4962	0.789	0.218	0	Hep3	LOC119598297
0	3.39805	0.456	0.076	0	Hep3	LOC119574273
0	3.37585	0.794	0.49	0	Hep3	LOC119574873
0	3.30727	0.864	0.191	0	Hep3	LOC119572332
0	3.29855	0.831	0.632	0	Hep3	LOC119583573
0	3.12288	0.502	0.09	0	Hep3	LOC119595716
0	3.06392	0.798	0.125	0	Hep3	LOC119572398
0	3.04822	0.771	0.04	0	Hep3	LOC119585904
0	2.99873	0.835	0.047	0	Hep3	LOC119594426
0	2.98419	0.376	0.05	0	Hep3	LOC119590513
0	2.98238	0.755	0.054	0	Hep3	LOC119585720
0	2.88165	0.934	0.288	0	Hep3	LOC119584010
0	2.86352	0.601	0.029	0	Hep3	LOC119585805
0	2.8569	0.479	0.079	0	Hep3	LOC119579036
0	2.83938	0.329	0.033	0	Hep3	LOC119588517
0	2.83797	0.381	0.016	0	Hep3	LOC119584196
0	2.75191	0.595	0.057	0	Hep3	LOC119586224
0	2.72775	0.71	0.126	0	Hep3	LOC119583831
0	2.72422	0.378	0.076	0	Hep3	LOC119573325
0	2.62082	0.85	0.189	0	Hep3	LOC119576960
0	2.61051	0.572	0.023	0	Hep3	LOC119574698
0	2.59368	0.586	0.08	0	Hep3	LOC119582346
0	2.58144	0.916	0.527	0	Hep3	LOC119582825
0	2.57042	0.812	0.12	0	Hep3	LOC119583785
0	2.5452	0.667	0.033	0	Hep3	LOC119594155
0	2.54287	0.413	0.049	0	Hep3	LOC119576448
0	2.51682	0.708	0.045	0	Hep3	LOC119590791
0	2.49628	0.757	0.069	0	Hep3	LOC119581839
0	2.48796	0.643	0.046	0	Hep3	LOC119590024
0	2.48335	0.804	0.168	0	Hep3	LOC119577270
0	2.46486	0.848	0.133	0	Hep3	LOC119573323
0	2.41084	0.26	0.008	0	Hep3	LOC119592659
0	2.39724	0.784	0.104	0	Hep3	LOC119572599
0	2.38419	0.688	0.073	0	Hep3	LOC119573068
0	2.35889	0.659	0.036	0	Hep3	LOC119581582
0	2.27837	0.137	0.002	0	Hep3	LOC119584187
0	2.2561	0.366	0.056	0	Hep3	LOC119597527
0	2.24037	0.657	0.066	0	Hep3	LOC119598351
0	2.18439	0.339	0.014	0	Hep3	LOC119580218
0	2.16327	0.708	0.076	0	Hep3	LOC119581846
0	2.14537	0.562	0.023	0	Hep3	LOC119569768
0	2.14479	0.831	0.269	0	Hep3	LOC119583808
0	2.14322	0.614	0.054	0	Hep3	LOC119586956
0	2.14296	0.785	0.156	0	Hep3	LOC119577126
0	2.11668	0.803	0.208	0	Hep3	LOC119576971
0	2.09456	0.6	0.027	0	Hep3	LOC119586244
0	2.06006	0.559	0.025	0	Hep3	LOC119598121
0	2.03185	0.654	0.127	0	Hep3	LOC119590667
0	2.01609	0.491	0.09	0	Hep3	LOC119599015
0	1.98133	0.485	0.018	0	Hep3	LOC119590164
0	1.96908	0.533	0.025	0	Hep3	LOC119583353
0	1.95773	0.366	0.023	0	Hep3	LOC119580149
0	1.93831	0.647	0.138	0	Hep3	LOC119582547
0	1.91363	0.471	0.013	0	Hep3	LOC119592501
0	1.90973	0.391	0.039	0	Hep3	LOC119589839
0	1.8504	0.499	0.036	0	Hep3	LOC119596163
0	1.84569	0.379	0.015	0	Hep3	LOC119596858
0	1.83595	0.818	0.298	0	Hep3	LOC119576393
0	1.83281	0.631	0.132	0	Hep3	LOC119578583
0	1.82238	0.727	0.287	0	Hep3	LOC119593982
0	1.81189	0.236	0.006	0	Hep3	LOC119584197
0	1.79758	0.52	0.049	0	Hep3	LOC119578897
0	1.79496	0.683	0.201	0	Hep3	LOC119574556
0	1.79294	0.401	0.02	0	Hep3	LOC119572330
0	1.75988	0.476	0.02	0	Hep3	LOC119588665
0	1.75754	0.396	0.057	0	Hep3	LOC119598690
0	1.71237	0.662	0.234	0	Hep3	LOC119575025
0	1.70025	0.455	0.02	0	Hep3	LOC119586307
0	1.69797	0.559	0.195	0	Hep3	LOC119581157
0	1.69204	0.488	0.037	0	Hep3	LOC119571536
0	1.67316	0.266	0.007	0	Hep3	LOC119595715
0	1.67254	0.354	0.032	0	Hep3	LOC119593117
0	1.66582	0.705	0.336	0	Hep3	LOC119573118
0	1.65099	0.435	0.026	0	Hep3	LOC119573181
0	1.65081	0.265	0.024	0	Hep3	LOC119597422
0	1.6288	0.87	0.535	0	Hep3	LOC119595078
0	1.62665	0.316	0.022	0	Hep3	LOC119581054
0	1.62517	0.425	0.039	0	Hep3	LOC119573100
0	1.62116	0.481	0.063	0	Hep3	LOC119588664
0	1.59529	0.555	0.103	0	Hep3	LOC119580856
0	1.58297	0.404	0.014	0	Hep3	LOC119597319
0	1.56738	0.377	0.029	0	Hep3	LOC119596914
0	1.55136	0.582	0.081	0	Hep3	LOC119594980
0	1.55085	0.342	0.035	0	Hep3	LOC119589188
0	1.54785	0.722	0.327	0	Hep3	LOC119587148
0	1.54113	0.166	0.005	0	Hep3	LOC119586939
0	1.53541	0.424	0.024	0	Hep3	LOC119595823
0	1.53211	0.525	0.147	0	Hep3	LOC119595034
0	1.53037	0.577	0.109	0	Hep3	LOC119576930
0	1.51765	0.356	0.032	0	Hep3	LOC119590722
0	1.51357	0.934	0.742	0	Hep3	LOC119589065
0	1.50035	0.39	0.016	0	Hep3	LOC119581000
0	1.48277	0.7	0.134	0	Hep3	LOC119594945
0	1.48137	0.478	0.086	0	Hep3	LOC119593954
0	1.46696	0.862	0.518	0	Hep3	LOC119594951
0	1.45947	0.524	0.138	0	Hep3	LOC119577213
0	1.45647	0.623	0.222	0	Hep3	LOC119575655
0	1.44703	0.444	0.078	0	Hep3	LOC119580122
0	1.44446	0.317	0.067	0	Hep3	LOC119574328
0	1.43294	0.481	0.102	0	Hep3	LOC119574446
0	1.42084	0.47	0.138	0	Hep3	LOC119572976
0	1.41013	0.541	0.17	0	Hep3	LOC119576776
0	1.40835	0.338	0.017	0	Hep3	LOC119574331
0	1.40108	0.233	0.004	0	Hep3	LOC119581697
0	1.39886	0.944	0.737	0	Hep3	LOC119591918
0	1.39392	0.226	0.027	0	Hep3	LOC119581695
0	1.38392	0.343	0.051	0	Hep3	LOC119594645
0	1.37953	0.214	0.026	0	Hep3	LOC119586294
0	1.37927	0.329	0.013	0	Hep3	LOC119576114
0	1.37781	0.182	0.017	0	Hep3	LOC119590598
0	1.37702	0.2	0.008	0	Hep3	LOC119580447
0	1.37586	0.946	0.747	0	Hep3	LOC119584410
0	1.35703	0.347	0.015	0	Hep3	LOC119577108
0	1.35551	0.697	0.365	0	Hep3	LOC119579404
0	1.34865	0.36	0.018	0	Hep3	LOC119574655
0	1.32141	0.315	0.022	0	Hep3	LOC119581472
0	1.32026	0.579	0.235	0	Hep3	LOC119596065
0	1.2995	0.27	0.013	0	Hep3	LOC119590501
0	1.29298	0.386	0.102	0	Hep3	LOC119599033
0	1.29183	0.273	0.048	0	Hep3	LOC119596927
0	1.28492	0.113	0.004	0	Hep3	LOC119589099
0	1.28017	0.344	0.02	0	Hep3	LOC119568407
0	1.27653	0.432	0.123	0	Hep3	LOC119574145
0	1.27615	0.358	0.072	0	Hep3	LOC119599333
0	1.27086	0.271	0.021	0	Hep3	LOC119576178
0	1.26496	0.302	0.017	0	Hep3	LOC119575134
0	1.26002	0.269	0.015	0	Hep3	LOC119582904
0	1.24908	0.915	0.712	0	Hep3	LOC119583416
0	1.24572	0.317	0.019	0	Hep3	LOC119572874
0	1.23801	0.165	0.017	0	Hep3	LOC119574482
0	1.22278	0.355	0.059	0	Hep3	LOC119595746
0	1.22137	0.396	0.1	0	Hep3	LOC119583873
0	1.21775	0.312	0.017	0	Hep3	LOC119597033
0	1.21244	0.363	0.035	0	Hep3	LOC119595020
0	1.21161	0.369	0.036	0	Hep3	LOC119597336
0	1.21143	0.967	0.861	0	Hep3	LOC119594551
0	1.2102	0.432	0.127	0	Hep3	LOC119597884
0	1.19474	0.341	0.054	0	Hep3	LOC119573119
0	1.1944	0.293	0.021	0	Hep3	LOC119591322
0	1.19007	0.343	0.042	0	Hep3	LOC119583679
0	1.18798	0.201	0.015	0	Hep3	LOC119586295
0	1.18462	0.193	0.006	0	Hep3	LOC119585669
0	1.17479	0.311	0.019	0	Hep3	LOC119584562
0	1.15455	0.271	0.015	0	Hep3	LOC119574968
0	1.1506	0.285	0.018	0	Hep3	LOC119583834
0	1.13747	0.238	0.015	0	Hep3	LOC119576786
0	1.12572	0.29	0.032	0	Hep3	LOC119597843
0	1.12012	0.308	0.022	0	Hep3	LOC119599457
0	1.12012	0.406	0.116	0	Hep3	LOC119578985
0	1.11657	0.323	0.038	0	Hep3	LOC119579687
0	1.11493	0.315	0.033	0	Hep3	LOC119572247
0	1.11377	0.251	0.012	0	Hep3	LOC119592483
0	1.09368	0.229	0.009	0	Hep3	LOC119572665
0	1.09345	0.218	0.013	0	Hep3	LOC119588608
0	1.08751	0.218	0.006	0	Hep3	LOC119580156
0	1.08568	0.258	0.013	0	Hep3	LOC119576939
0	1.08554	0.287	0.054	0	Hep3	LOC119580811
0	1.08438	0.339	0.079	0	Hep3	LOC119583052
0	1.08085	0.252	0.039	0	Hep3	LOC119586495
0	1.0788	0.393	0.115	0	Hep3	LOC119583654
0	1.07222	0.292	0.042	0	Hep3	LOC119582548
0	1.07204	0.302	0.04	0	Hep3	LOC119572328
0	1.06638	0.274	0.042	0	Hep3	LOC119580231
0	1.06511	0.341	0.059	0	Hep3	LOC119595070
0	1.06153	0.256	0.006	0	Hep3	LOC119577430
0	1.06134	0.25	0.016	0	Hep3	LOC119598253
0	1.05015	0.21	0.006	0	Hep3	LOC119576724
0	1.04957	0.242	0.008	0	Hep3	LOC119593505
0	1.0416	0.186	0.006	0	Hep3	LOC119597846
0	1.03382	0.226	0.01	0	Hep3	LOC119572606
0	1.0316	0.136	0.006	0	Hep3	LOC119586475
0	1.0305	0.926	0.711	0	Hep3	LOC119575427
0	1.03025	0.219	0.016	0	Hep3	LOC119590825
0	1.02239	0.247	0.011	0	Hep3	LOC119592092
0	1.00269	0.297	0.053	0	Hep3	LOC119581797
0	1.00259	0.171	0.012	0	Hep3	LOC119589100
0	1.00153	0.269	0.032	0	Hep3	LOC119585589
0	0.999824	0.237	0.019	0	Hep3	LOC119574619
0	0.987548	0.21	0.003	0	Hep3	LOC119586298
0	0.97993	0.151	0.005	0	Hep3	LOC119586940
0	0.973816	0.248	0.036	0	Hep3	LOC119595613
0	0.956908	0.171	0.008	0	Hep3	LOC119580157
0	0.955794	0.231	0.009	0	Hep3	LOC119592048
0	0.949348	0.232	0.011	0	Hep3	LOC119581616
0	0.940643	0.239	0.011	0	Hep3	LOC119573178
0	0.937618	0.179	0.006	0	Hep3	LOC119588935
0	0.92542	0.239	0.014	0	Hep3	LOC119574954
0	0.921948	0.196	0.012	0	Hep3	LOC119596032
0	0.911424	0.281	0.053	0	Hep3	LOC119580896
0	0.905258	0.302	0.063	0	Hep3	LOC119580310
0	0.883763	0.21	0.01	0	Hep3	LOC119590078
0	0.882418	0.198	0.01	0	Hep3	LOC119585693
0	0.881866	0.191	0.009	0	Hep3	LOC119585695
0	0.871908	0.23	0.011	0	Hep3	LOC119583495
0	0.864618	0.154	0.003	0	Hep3	LOC119594044
0	0.858888	0.224	0.019	0	Hep3	LOC119569369
0	0.858698	0.214	0.01	0	Hep3	LOC119582508
0	0.858211	0.255	0.025	0	Hep3	LOC119582733
0	0.856859	0.229	0.015	0	Hep3	LOC119578957
0	0.848555	0.119	0.004	0	Hep3	LOC119599270
0	0.828982	0.146	0.009	0	Hep3	LOC119594027
0	0.82798	0.169	0.004	0	Hep3	LOC119580595
0	0.822414	0.205	0.008	0	Hep3	LOC119578095
0	0.821946	0.21	0.011	0	Hep3	LOC119586305
0	0.819837	0.208	0.014	0	Hep3	LOC119581150
0	0.816766	0.196	0.005	0	Hep3	LOC119578413
0	0.779473	0.179	0.005	0	Hep3	LOC119577123
0	0.778915	0.167	0.013	0	Hep3	LOC119583672
0	0.7703	0.178	0.019	0	Hep3	LOC119583043
0	0.758298	0.155	0.006	0	Hep3	LOC119594247
0	0.756384	0.177	0.007	0	Hep3	LOC119581847
0	0.748203	0.16	0.009	0	Hep3	LOC119582673
0	0.745394	0.28	0.052	0	Hep3	LOC119593833
0	0.726438	0.164	0.009	0	Hep3	LOC119574216
0	0.721822	0.175	0.013	0	Hep3	LOC119582518
0	0.706831	0.154	0.008	0	Hep3	LOC119583665
0	0.70617	0.178	0.01	0	Hep3	LOC119571533
0	0.705394	0.173	0.013	0	Hep3	LOC119592702
0	0.687024	0.178	0.013	0	Hep3	LOC119587128
0	0.685397	0.159	0.007	0	Hep3	LOC119588067
0	0.683029	0.14	0.004	0	Hep3	LOC119589482
0	0.675605	0.159	0.011	0	Hep3	LOC119579179
0	0.672671	0.176	0.02	0	Hep3	LOC119573003
0	0.667891	0.173	0.017	0	Hep3	LOC119585797
0	0.648038	0.151	0.008	0	Hep3	LOC119574993
0	0.64659	0.146	0.003	0	Hep3	LOC119589104
0	0.644062	0.113	0.003	0	Hep3	LOC119594249
0	0.636013	0.116	0.005	0	Hep3	LOC119578982
0	0.634216	0.164	0.016	0	Hep3	LOC119579358
0	0.634019	0.164	0.014	0	Hep3	LOC119576809
0	0.625431	0.154	0.008	0	Hep3	LOC119577959
0	0.611845	0.138	0.008	0	Hep3	LOC119583643
0	0.591461	0.125	0.004	0	Hep3	LOC119592010
0	0.588144	0.122	0.006	0	Hep3	LOC119594094
0	0.584848	0.132	0.003	0	Hep3	LOC119581360
0	0.572811	0.123	0.005	0	Hep3	LOC119595079
0	0.571744	0.127	0.004	0	Hep3	LOC119574911
0	0.561165	0.139	0.005	0	Hep3	LOC119587094
0	0.556564	0.136	0.01	0	Hep3	LOC119586371
0	0.551349	0.116	0.006	0	Hep3	LOC119574212
0	0.525608	0.128	0.004	0	Hep3	LOC119583647
0	0.50912	0.119	0.004	0	Hep3	LOC119586348
0	0.504644	0.111	0.004	0	Hep3	LOC119594032
0	0.504	0.117	0.005	0	Hep3	LOC119587829
0	0.500428	0.12	0.005	0	Hep3	LOC119586700
0	0.498078	0.115	0.002	0	Hep3	LOC119576202
0	0.495331	0.125	0.007	0	Hep3	LOC119585801
0	0.473006	0.106	0.004	0	Hep3	LOC119574421
0	0.446786	0.114	0.005	0	Hep3	LOC119591351
0	0.446109	0.118	0.005	0	Hep3	LOC119598908
0	0.44474	0.205	0.027	0	Hep3	LOC119596901
4.93126e-308	0.624642	0.141	0.011	7.58575e-304	Hep3	LOC119587746
7.36717e-307	1.24578	0.511	0.207	1.13329e-302	Hep3	LOC119598916
9.05985e-305	2.54801	0.496	0.177	1.39368e-300	Hep3	LOC119578800
1.63661e-297	1.56815	0.295	0.063	2.5176e-293	Hep3	LOC119589083
5.66896e-297	1.04733	0.398	0.125	8.72057e-293	Hep3	LOC119578071
3.23016e-295	0.762907	0.991	0.943	4.96895e-291	Hep3	LOC119589496
1.67313e-294	0.914791	0.139	0.012	2.57377e-290	Hep3	LOC119596963
3.32436e-294	0.685994	0.975	0.936	5.11386e-290	Hep3	LOC119593195
1.67226e-290	2.90078	0.189	0.026	2.57243e-286	Hep3	LOC119598298
3.71457e-289	0.466355	0.109	0.006	5.71413e-285	Hep3	LOC119574490
1.01376e-285	0.93544	0.29	0.065	1.55947e-281	Hep3	LOC119595068
3.23345e-284	0.440675	0.1	0.004	4.97402e-280	Hep3	LOC119597538
4.5872e-280	1.60862	0.172	0.022	7.0565e-276	Hep3	LOC119588028
1.44829e-278	0.834306	0.136	0.012	2.2279e-274	Hep3	LOC119577701
1.86355e-277	0.805508	0.227	0.042	2.86669e-273	Hep3	LOC119593577
3.74517e-277	0.982078	0.815	0.525	5.7612e-273	Hep3	LOC119583675
3.83122e-276	1.44188	0.159	0.018	5.89357e-272	Hep3	LOC119588241
5.98362e-275	1.04265	0.681	0.384	9.2046e-271	Hep3	LOC119582832
5.98034e-274	1.36292	0.635	0.28	9.19956e-270	Hep3	LOC119597587
4.74237e-273	0.653641	0.128	0.01	7.29519e-269	Hep3	LOC119570475
7.72905e-273	0.492072	0.103	0.005	1.18896e-268	Hep3	LOC119596882
2.21544e-268	0.774936	0.12	0.009	3.40801e-264	Hep3	LOC119568985
3.65495e-267	1.01613	0.2	0.031	5.62241e-263	Hep3	LOC119574133
1.15194e-264	0.606738	0.167	0.022	1.77202e-260	Hep3	LOC119592243
3.41899e-264	0.422113	0.108	0.007	5.25944e-260	Hep3	LOC119582674
1.97078e-263	1.02415	0.316	0.088	3.03165e-259	Hep3	LOC119595236
6.72401e-262	1.86915	0.184	0.028	1.03436e-257	Hep3	LOC119588027
3.43524e-259	0.502049	0.117	0.009	5.28443e-255	Hep3	LOC119581950
1.96194e-258	1.08443	0.806	0.56	3.01806e-254	Hep3	LOC119593854
4.95314e-251	0.884754	0.281	0.072	7.61942e-247	Hep3	LOC119579969
4.95439e-248	3.75276	0.255	0.06	7.62134e-244	Hep3	LOC119590523
2.10194e-246	0.86258	0.195	0.034	3.23341e-242	Hep3	LOC119590611
5.78551e-246	0.594107	0.14	0.015	8.89985e-242	Hep3	LOC119587059
1.32283e-242	2.36321	0.318	0.092	2.03491e-238	Hep3	LOC119589377
1.96866e-240	0.779392	0.253	0.059	3.0284e-236	Hep3	LOC119586950
7.66129e-240	0.581135	0.102	0.007	1.17854e-235	Hep3	LOC119596737
1.94896e-239	1.04556	0.229	0.047	2.99808e-235	Hep3	LOC119576346
8.9196e-237	0.865148	0.312	0.089	1.3721e-232	Hep3	LOC119575634
4.13434e-236	4.7605	0.272	0.069	6.35986e-232	Hep3	LOC119568402
2.21456e-235	1.04135	0.453	0.192	3.40665e-231	Hep3	LOC119598126
2.90747e-232	1.04	0.245	0.057	4.47256e-228	Hep3	LOC119578739
1.50546e-231	2.12326	0.286	0.077	2.31585e-227	Hep3	LOC119585595
1.40512e-227	1.98781	0.165	0.025	2.1615e-223	Hep3	LOC119587036
1.4215e-227	0.596592	0.106	0.009	2.18669e-223	Hep3	LOC119596147
1.95096e-224	3.56883	0.585	0.298	3.00117e-220	Hep3	LOC119580256
5.67304e-224	1.0228	0.542	0.277	8.72684e-220	Hep3	LOC119575417
3.98849e-218	0.665765	0.122	0.013	6.13549e-214	Hep3	LOC119573130
3.28567e-216	0.93602	0.483	0.223	5.05435e-212	Hep3	LOC119580190
1.04532e-215	0.76882	0.19	0.037	1.60801e-211	Hep3	LOC119581611
1.27767e-215	0.564169	0.147	0.021	1.96544e-211	Hep3	LOC119581771
2.51444e-215	0.82303	0.243	0.061	3.86797e-211	Hep3	LOC119598905
2.12173e-212	1.19533	0.553	0.302	3.26385e-208	Hep3	LOC119580092
7.88538e-210	0.821444	0.816	0.566	1.21301e-205	Hep3	LOC119594903
3.69076e-208	0.619989	0.157	0.025	5.6775e-204	Hep3	LOC119575367
1.93479e-205	0.704085	0.986	0.946	2.97629e-201	Hep3	LOC119582540
3.18859e-205	0.720137	0.787	0.547	4.905e-201	Hep3	LOC119580222
4.19429e-205	0.852691	0.295	0.092	6.45207e-201	Hep3	LOC119591992
6.87755e-205	0.683753	0.198	0.042	1.05797e-200	Hep3	LOC119588080
1.67124e-203	0.880873	0.713	0.444	2.57087e-199	Hep3	LOC119582609
2.17764e-203	1.10912	0.596	0.34	3.34987e-199	Hep3	LOC119577804
8.84382e-202	0.953219	0.361	0.136	1.36044e-197	Hep3	LOC119579496
6.8738e-201	1.03775	0.361	0.137	1.0574e-196	Hep3	LOC119589948
7.34934e-201	0.472165	0.124	0.016	1.13055e-196	Hep3	LOC119572535
1.09743e-198	0.716686	0.973	0.902	1.68818e-194	Hep3	LOC119595880
1.85391e-198	0.750606	0.246	0.065	2.85187e-194	Hep3	LOC119576243
4.52769e-197	0.75452	0.145	0.022	6.96495e-193	Hep3	LOC119599102
1.95554e-196	0.820966	0.313	0.102	3.0082e-192	Hep3	LOC119596390
2.24711e-196	0.537019	0.122	0.016	3.45674e-192	Hep3	LOC119596844
3.3497e-196	0.439403	0.122	0.015	5.15285e-192	Hep3	LOC119573113
6.14535e-194	0.958319	0.158	0.027	9.45339e-190	Hep3	LOC119593861
5.57924e-192	3.72028	0.475	0.24	8.58255e-188	Hep3	LOC119580360
5.17448e-190	0.761843	0.246	0.068	7.9599e-186	Hep3	LOC119578887
7.18966e-188	0.93539	0.42	0.188	1.10599e-183	Hep3	LOC119574392
1.58054e-187	0.884873	0.663	0.409	2.43135e-183	Hep3	LOC119592697
9.01146e-187	1.05351	0.447	0.221	1.38623e-182	Hep3	LOC119590669
2.15283e-186	0.526898	0.153	0.027	3.3117e-182	Hep3	LOC119577855
2.61717e-186	1.89001	0.307	0.1	4.026e-182	Hep3	LOC119598866
2.66166e-186	0.735495	0.261	0.077	4.09444e-182	Hep3	LOC119572977
7.84367e-186	0.487776	0.113	0.014	1.20659e-181	Hep3	LOC119590703
1.59651e-184	0.548331	0.137	0.022	2.45591e-180	Hep3	LOC119598589
1.12303e-183	1.01697	0.718	0.394	1.72756e-179	Hep3	LOC119590855
6.20147e-182	0.925327	0.287	0.098	9.53973e-178	Hep3	LOC119579419
3.76027e-181	0.586684	0.161	0.031	5.78442e-177	Hep3	LOC119578709
5.34186e-179	0.761184	0.244	0.071	8.21738e-175	Hep3	LOC119579561
5.94964e-179	0.615068	0.146	0.025	9.15234e-175	Hep3	LOC119576369
4.77203e-176	1.05061	0.123	0.018	7.34082e-172	Hep3	LOC119594096
6.42953e-176	0.58923	0.583	0.281	9.89054e-172	Hep3	LOC119588769
7.25029e-174	0.753471	0.227	0.065	1.11531e-169	Hep3	LOC119583770
5.65572e-173	1.03683	0.478	0.251	8.70019e-169	Hep3	LOC119599055
4.80333e-172	0.392909	0.102	0.012	7.38896e-168	Hep3	LOC119596898
6.26604e-172	0.762039	0.898	0.707	9.63904e-168	Hep3	LOC119594677
5.98666e-171	0.579089	0.15	0.028	9.20928e-167	Hep3	LOC119575316
2.78838e-170	0.621103	0.967	0.894	4.28937e-166	Hep3	LOC119592465
4.48429e-169	0.99442	0.167	0.036	6.89818e-165	Hep3	LOC119590016
1.25512e-166	0.84271	0.573	0.338	1.93076e-162	Hep3	LOC119579214
1.98078e-166	1.07998	0.537	0.299	3.04703e-162	Hep3	LOC119599330
2.68663e-166	2.15895	0.565	0.312	4.13284e-162	Hep3	LOC119594820
3.49859e-166	0.859394	0.256	0.083	5.38189e-162	Hep3	LOC119593828
7.65022e-166	0.531309	0.144	0.026	1.17683e-161	Hep3	LOC119592137
4.68668e-165	0.82359	0.368	0.143	7.20951e-161	Hep3	LOC119588772
8.52849e-165	0.616169	0.18	0.042	1.31194e-160	Hep3	LOC119598930
1.44698e-163	0.561956	0.161	0.034	2.22589e-159	Hep3	LOC119591919
1.61979e-163	3.88592	0.471	0.244	2.49173e-159	Hep3	LOC119590490
5.61146e-163	0.372708	0.127	0.02	8.63211e-159	Hep3	LOC119599375
3.50578e-162	0.657146	0.175	0.041	5.39294e-158	Hep3	LOC119595862
2.78792e-159	0.692004	0.16	0.035	4.28866e-155	Hep3	LOC119571124
3.1407e-157	0.385698	0.184	0.043	4.83134e-153	Hep3	LOC119593121
1.35185e-156	0.839838	0.522	0.303	2.07955e-152	Hep3	LOC119576073
2.45301e-155	0.750235	0.266	0.092	3.77346e-151	Hep3	LOC119581772
1.28145e-153	0.840649	0.756	0.531	1.97126e-149	Hep3	LOC119575425
5.31671e-152	0.668093	0.215	0.063	8.1787e-148	Hep3	LOC119586399
9.70682e-152	0.594316	0.176	0.043	1.4932e-147	Hep3	LOC119596743
2.77051e-150	0.711513	0.219	0.067	4.26187e-146	Hep3	LOC119578863
6.41283e-150	0.761097	0.173	0.042	9.86486e-146	Hep3	LOC119587818
2.54511e-149	0.673895	0.235	0.075	3.91514e-145	Hep3	LOC119588465
2.90981e-149	0.757853	0.284	0.107	4.47617e-145	Hep3	LOC119579308
1.11065e-145	0.384062	0.107	0.016	1.70851e-141	Hep3	LOC119589965
3.22639e-143	0.865526	0.421	0.212	4.96316e-139	Hep3	LOC119576101
4.34906e-143	0.761044	0.261	0.095	6.69016e-139	Hep3	LOC119592030
1.64435e-140	0.81913	0.217	0.069	2.52951e-136	Hep3	LOC119574654
1.99538e-140	0.814276	0.278	0.105	3.0695e-136	Hep3	LOC119585870
2.82048e-140	0.591886	0.883	0.712	4.33874e-136	Hep3	LOC119587054
1.1238e-139	0.775503	0.286	0.114	1.72874e-135	Hep3	LOC119587171
4.47037e-139	0.573863	0.174	0.046	6.87678e-135	Hep3	LOC119570481
8.40165e-138	0.69189	0.704	0.482	1.29243e-133	Hep3	LOC119590104
3.77255e-137	0.940125	0.284	0.108	5.80331e-133	Hep3	LOC119588832
1.47174e-136	0.735507	0.608	0.405	2.26398e-132	Hep3	LOC119584989
1.47036e-135	0.897382	0.517	0.317	2.26185e-131	Hep3	LOC119574593
3.8293e-135	0.782077	0.408	0.213	5.89062e-131	Hep3	LOC119597597
5.25332e-134	0.649914	0.629	0.408	8.08119e-130	Hep3	LOC119580388
1.26648e-133	0.484629	0.902	0.745	1.94823e-129	Hep3	LOC119577790
1.79484e-131	0.823565	0.54	0.34	2.76101e-127	Hep3	LOC119577821
1.19806e-129	0.441914	0.975	0.932	1.84298e-125	Hep3	LOC119575502
1.15221e-128	0.587929	0.811	0.568	1.77244e-124	Hep3	LOC119583600
5.69277e-127	1.37213	0.628	0.445	8.75719e-123	Hep3	LOC119598648
1.38906e-126	0.725981	0.219	0.076	2.13679e-122	Hep3	LOC119598077
1.49148e-125	0.485088	0.163	0.044	2.29434e-121	Hep3	LOC119576291
5.30098e-125	0.443914	0.102	0.018	8.1545e-121	Hep3	LOC119589515
1.13231e-124	0.547604	0.164	0.045	1.74183e-120	Hep3	LOC119578686
6.12686e-124	0.55338	0.113	0.021	9.42494e-120	Hep3	LOC119577125
2.59289e-123	0.474741	0.119	0.024	3.98864e-119	Hep3	LOC119579178
3.60789e-123	0.721809	0.542	0.339	5.55002e-119	Hep3	LOC119594084
2.26534e-121	0.591186	0.214	0.073	3.48478e-117	Hep3	LOC119589280
2.51716e-121	0.835994	0.445	0.208	3.87215e-117	Hep3	LOC119599100
2.61269e-121	0.587242	0.973	0.903	4.0191e-117	Hep3	LOC119594752
2.89738e-120	0.610217	0.185	0.053	4.45703e-116	Hep3	LOC119596189
7.5221e-120	0.685445	0.501	0.307	1.15713e-115	Hep3	LOC119597330
1.51972e-119	0.710998	0.738	0.541	2.33779e-115	Hep3	LOC119595659
3.9877e-119	0.842111	0.456	0.27	6.13428e-115	Hep3	LOC119568149
6.3404e-117	0.752058	0.387	0.212	9.75344e-113	Hep3	LOC119596906
5.12131e-116	0.401384	0.106	0.021	7.87811e-112	Hep3	LOC119578038
7.40794e-116	0.512128	0.149	0.04	1.13956e-111	Hep3	LOC119580403
1.01393e-115	0.496588	0.374	0.177	1.55974e-111	Hep3	LOC119596908
1.19441e-115	0.495707	0.978	0.925	1.83736e-111	Hep3	LOC119575018
2.77759e-115	0.682476	0.224	0.082	4.27276e-111	Hep3	LOC119579477
6.35272e-115	0.717548	0.403	0.222	9.77238e-111	Hep3	LOC119589070
1.19055e-114	0.738649	0.365	0.188	1.83142e-110	Hep3	LOC119581864
1.64524e-113	0.583526	0.191	0.062	2.53087e-109	Hep3	LOC119587828
3.81702e-113	0.704676	0.384	0.201	5.87172e-109	Hep3	LOC119579026
7.92118e-113	0.682691	0.417	0.231	1.21851e-108	Hep3	LOC119576388
3.16414e-110	0.64043	0.274	0.118	4.86739e-106	Hep3	LOC119594747
4.19135e-110	0.580559	0.17	0.052	6.44756e-106	Hep3	LOC119575364
5.50937e-110	0.84365	0.343	0.177	8.47506e-106	Hep3	LOC119581792
8.63062e-108	0.654556	0.201	0.072	1.32765e-103	Hep3	LOC119598296
2.6781e-107	0.739546	0.209	0.077	4.11972e-103	Hep3	LOC119576304
3.04169e-104	0.572413	0.237	0.092	4.67902e-100	Hep3	LOC119572450
1.15097e-103	0.604453	0.598	0.412	1.77054e-99	Hep3	LOC119595233
9.7055e-102	1.07341	0.245	0.104	1.493e-97	Hep3	LOC119580006
1.0922e-101	0.486419	0.185	0.063	1.68014e-97	Hep3	LOC119586275
6.74055e-101	0.492472	0.918	0.775	1.0369e-96	Hep3	LOC119573193
8.4014e-100	0.527358	0.147	0.043	1.29239e-95	Hep3	LOC119598293
1.7755e-99	0.557991	0.298	0.136	2.73126e-95	Hep3	LOC119577916
2.1517e-98	0.283302	0.102	0.022	3.30997e-94	Hep3	LOC119578072
3.46664e-97	0.602055	0.203	0.077	5.33273e-93	Hep3	LOC119577129
1.64743e-96	0.810033	0.221	0.091	2.53424e-92	Hep3	LOC119597805
1.7872e-96	0.537325	0.886	0.708	2.74925e-92	Hep3	LOC119579403
2.40878e-96	0.373771	0.124	0.032	3.70543e-92	Hep3	LOC119578138
1.36308e-95	0.629635	0.172	0.059	2.09683e-91	Hep3	LOC119579310
4.11863e-95	0.40253	0.117	0.03	6.33569e-91	Hep3	LOC119581942
1.02775e-94	0.702058	0.344	0.188	1.58099e-90	Hep3	LOC119575097
1.02595e-93	0.429141	0.129	0.035	1.57821e-89	Hep3	LOC119570696
8.81024e-93	0.758782	0.522	0.329	1.35528e-88	Hep3	LOC119580803
1.46491e-92	0.50017	0.125	0.034	2.25347e-88	Hep3	LOC119598581
1.51029e-92	0.501557	0.605	0.415	2.32328e-88	Hep3	LOC119568283
3.84049e-92	0.633094	0.389	0.225	5.90782e-88	Hep3	LOC119589916
8.70198e-92	0.735274	0.381	0.223	1.33863e-87	Hep3	LOC119568684
3.26965e-89	0.567386	0.288	0.144	5.0297e-85	Hep3	LOC119599448
7.93035e-89	0.513607	0.182	0.068	1.21993e-84	Hep3	LOC119581024
8.34921e-89	0.676031	0.427	0.272	1.28436e-84	Hep3	LOC119578778
1.75994e-88	0.681088	0.371	0.216	2.70731e-84	Hep3	LOC119586396
8.20866e-88	0.56136	0.13	0.039	1.26274e-83	Hep3	LOC119580127
2.07988e-87	0.598421	0.411	0.248	3.19948e-83	Hep3	LOC119588696
7.19353e-87	0.422945	0.126	0.037	1.10658e-82	Hep3	LOC119575026
1.03918e-86	0.466842	0.111	0.029	1.59857e-82	Hep3	LOC119577951
9.74853e-85	0.506479	0.153	0.05	1.49962e-80	Hep3	LOC119581212
1.23195e-84	0.66456	0.357	0.209	1.8951e-80	Hep3	LOC119582556
3.08521e-84	0.644551	0.489	0.334	4.74597e-80	Hep3	LOC119589931
1.64431e-83	0.488763	0.136	0.043	2.52945e-79	Hep3	LOC119597151
1.88765e-83	0.620168	0.556	0.385	2.90377e-79	Hep3	LOC119587149
2.29064e-83	0.486149	0.697	0.518	3.5237e-79	Hep3	LOC119583403
2.32968e-83	0.775392	0.483	0.335	3.58374e-79	Hep3	LOC119597591
3.37707e-83	0.660269	0.471	0.31	5.19494e-79	Hep3	LOC119593086
6.04046e-83	0.582088	0.231	0.106	9.29203e-79	Hep3	LOC119599371
1.67647e-82	0.64713	0.345	0.201	2.57892e-78	Hep3	LOC119596923
1.48497e-81	0.418954	0.983	0.941	2.28432e-77	Hep3	LOC119577692
4.70023e-81	0.616807	0.307	0.166	7.23036e-77	Hep3	LOC119574300
8.43249e-81	0.41939	0.155	0.054	1.29717e-76	Hep3	LOC119580034
6.43937e-80	0.702179	0.394	0.241	9.90568e-76	Hep3	LOC119580278
2.47459e-79	0.593053	0.3	0.159	3.80667e-75	Hep3	LOC119577953
3.69824e-78	0.488497	0.709	0.51	5.689e-74	Hep3	LOC119573278
4.65532e-77	0.690363	0.355	0.217	7.16128e-73	Hep3	LOC119588511
1.47811e-76	0.669498	0.312	0.172	2.27378e-72	Hep3	LOC119597786
8.35143e-76	0.684888	0.343	0.206	1.2847e-71	Hep3	LOC119587854
1.4213e-75	0.682776	0.282	0.151	2.18639e-71	Hep3	LOC119585247
2.44503e-75	0.581154	0.532	0.372	3.76118e-71	Hep3	LOC119577273
3.82666e-75	0.493138	0.547	0.39	5.88655e-71	Hep3	LOC119595732
1.70757e-74	0.752884	0.299	0.169	2.62675e-70	Hep3	LOC119592184
4.89356e-74	0.417787	0.983	0.946	7.52776e-70	Hep3	LOC119591393
9.0636e-74	0.439997	0.982	0.948	1.39425e-69	Hep3	LOC119593141
4.19148e-73	0.482021	0.612	0.461	6.44775e-69	Hep3	LOC119576212
4.20023e-73	0.645714	0.318	0.185	6.46122e-69	Hep3	LOC119571674
5.66714e-73	0.285718	0.432	0.27	8.71776e-69	Hep3	LOC119580407
4.61529e-72	0.538838	0.416	0.274	7.0997e-68	Hep3	LOC119598748
4.63724e-72	0.479944	0.49	0.342	7.13347e-68	Hep3	LOC119568198
6.21329e-72	0.605341	0.366	0.229	9.55791e-68	Hep3	LOC119575213
1.17074e-71	0.383688	0.963	0.883	1.80094e-67	Hep3	LOC119592515
1.64499e-71	0.512094	0.142	0.051	2.53049e-67	Hep3	LOC119568934
6.45569e-70	0.455404	0.982	0.95	9.93079e-66	Hep3	LOC119578928
6.86362e-70	0.591056	0.295	0.164	1.05583e-65	Hep3	LOC119568194
1.37529e-69	0.503668	0.102	0.03	2.11561e-65	Hep3	LOC119577151
3.22428e-69	0.657329	0.186	0.083	4.95992e-65	Hep3	LOC119581155
9.53044e-69	0.375689	0.979	0.928	1.46607e-64	Hep3	LOC119583482
1.09702e-68	0.390967	0.102	0.029	1.68755e-64	Hep3	LOC119574258
4.07683e-68	0.681958	0.25	0.13	6.27139e-64	Hep3	LOC119575099
1.00701e-67	0.432454	0.108	0.033	1.54909e-63	Hep3	LOC119586933
4.77696e-67	0.346415	0.102	0.03	7.3484e-63	Hep3	LOC119579485
5.90301e-67	0.372019	0.974	0.912	9.08059e-63	Hep3	LOC119577802
1.51395e-66	0.425867	0.135	0.049	2.32891e-62	Hep3	LOC119584399
2.85891e-66	0.640065	0.438	0.305	4.39786e-62	Hep3	LOC119589934
1.05385e-65	0.340478	0.11	0.034	1.62113e-61	Hep3	LOC119596942
1.35011e-65	0.535765	0.437	0.303	2.07687e-61	Hep3	LOC119574974
2.02619e-64	0.560828	0.38	0.249	3.1169e-60	Hep3	LOC119579259
4.21555e-64	0.554309	0.392	0.263	6.48478e-60	Hep3	LOC119597623
7.49905e-64	0.540783	0.373	0.243	1.15358e-59	Hep3	LOC119597508
1.06909e-63	0.617495	0.267	0.148	1.64458e-59	Hep3	LOC119574930
1.74929e-63	0.354602	0.781	0.591	2.69093e-59	Hep3	LOC119598975
2.09478e-63	0.446892	0.121	0.042	3.2224e-59	Hep3	LOC119586816
2.21168e-63	0.363638	0.98	0.942	3.40223e-59	Hep3	LOC119592037
5.59889e-63	0.401454	0.162	0.066	8.61278e-59	Hep3	LOC119590018
8.60081e-63	0.610253	0.272	0.156	1.32306e-58	Hep3	LOC119583830
1.40157e-62	0.788065	0.35	0.228	2.15603e-58	Hep3	LOC119584564
4.20384e-61	0.383688	0.54	0.406	6.46676e-57	Hep3	LOC119589105
9.61827e-61	0.496033	0.203	0.099	1.47958e-56	Hep3	LOC119584237
2.31119e-60	0.399737	0.614	0.459	3.5553e-56	Hep3	LOC119584566
3.7226e-60	0.48068	0.481	0.345	5.72647e-56	Hep3	LOC119579354
2.52444e-59	0.40104	0.524	0.383	3.88335e-55	Hep3	LOC119576092
3.52628e-59	0.525743	0.19	0.091	5.42447e-55	Hep3	LOC119592830
3.73136e-59	0.750663	0.175	0.081	5.73995e-55	Hep3	LOC119569265
1.18755e-58	0.543197	0.38	0.259	1.82681e-54	Hep3	LOC119573060
2.26764e-58	0.389315	0.185	0.085	3.48831e-54	Hep3	LOC119595622
2.47745e-58	0.404428	0.124	0.045	3.81107e-54	Hep3	LOC119585829
1.42546e-57	0.485595	0.405	0.282	2.19278e-53	Hep3	LOC119575583
3.72324e-57	0.516274	0.541	0.413	5.72746e-53	Hep3	LOC119574343
7.50741e-57	0.37734	0.936	0.834	1.15487e-52	Hep3	LOC119589497
1.39455e-56	0.513657	0.461	0.33	2.14523e-52	Hep3	LOC119591350
3.54546e-56	0.330437	0.105	0.036	5.45398e-52	Hep3	LOC119593068
6.30528e-55	0.414445	0.137	0.057	9.69941e-51	Hep3	LOC119596587
1.17552e-54	0.81432	0.386	0.238	1.80831e-50	Hep3	LOC119585568
2.45453e-54	0.326484	0.1	0.034	3.7758e-50	Hep3	LOC119573234
5.01014e-54	0.512701	0.533	0.44	7.7071e-50	Hep3	LOC119581923
6.17437e-54	0.374152	0.934	0.837	9.49804e-50	Hep3	LOC119593096
6.34793e-54	0.795548	0.779	0.68	9.76502e-50	Hep3	LOC119590721
8.65311e-54	0.364544	0.599	0.467	1.33111e-49	Hep3	LOC119588546
1.00595e-53	0.361595	0.124	0.048	1.54745e-49	Hep3	LOC119576787
3.62797e-53	0.542728	0.295	0.184	5.5809e-49	Hep3	LOC119592239
3.15135e-52	0.452775	0.38	0.26	4.84772e-48	Hep3	LOC119582491
4.24214e-52	0.585878	0.606	0.501	6.52569e-48	Hep3	LOC119569255
1.06156e-51	0.481225	0.206	0.103	1.633e-47	Hep3	LOC119596928
1.36567e-51	0.781845	0.289	0.183	2.10081e-47	Hep3	LOC119593775
3.17832e-51	0.405286	0.121	0.047	4.88921e-47	Hep3	LOC119573231
5.4184e-51	0.531433	0.392	0.254	8.33513e-47	Hep3	LOC119582601
8.984e-51	0.399364	0.117	0.046	1.38201e-46	Hep3	LOC119578594
1.35215e-50	0.374675	0.953	0.879	2.08001e-46	Hep3	LOC119590715
4.03599e-50	0.433655	0.457	0.338	6.20856e-46	Hep3	LOC119584804
3.1583e-49	0.464958	0.518	0.388	4.85841e-45	Hep3	LOC119595117
2.26695e-48	0.484657	0.174	0.086	3.48724e-44	Hep3	LOC119583558
3.63731e-48	0.561618	0.353	0.242	5.59527e-44	Hep3	LOC119573284
1.48213e-47	0.337353	0.105	0.039	2.27997e-43	Hep3	LOC119574481
1.64384e-47	0.477349	0.586	0.455	2.52872e-43	Hep3	LOC119593841
3.05086e-47	0.308637	0.1	0.036	4.69313e-43	Hep3	LOC119583780
4.41485e-47	0.875834	0.419	0.309	6.79136e-43	Hep3	LOC119574941
5.59655e-47	0.513155	0.356	0.252	8.60918e-43	Hep3	LOC119586128
6.16737e-47	0.305678	0.701	0.52	9.48727e-43	Hep3	LOC119582704
5.96002e-46	0.464193	0.203	0.111	9.1683e-42	Hep3	LOC119585629
6.03763e-46	0.40444	0.108	0.043	9.28769e-42	Hep3	LOC119593643
7.44774e-46	0.371166	0.534	0.41	1.14569e-41	Hep3	LOC119578670
9.17853e-46	0.475614	0.245	0.145	1.41193e-41	Hep3	LOC119583695
6.45676e-45	0.490592	0.393	0.29	9.93243e-41	Hep3	LOC119577148
5.37918e-44	0.463014	0.255	0.153	8.27479e-40	Hep3	LOC119575010
7.6498e-44	0.525278	0.223	0.131	1.17677e-39	Hep3	LOC119597792
8.95175e-44	0.290068	0.979	0.956	1.37705e-39	Hep3	LOC119584424
3.48408e-43	0.387056	0.952	0.895	5.35956e-39	Hep3	LOC119585734
3.6978e-43	0.543922	0.276	0.181	5.68832e-39	Hep3	LOC119576951
8.91813e-43	0.440642	0.589	0.482	1.37188e-38	Hep3	LOC119576143
9.28194e-43	0.408826	0.386	0.282	1.42784e-38	Hep3	LOC119589267
2.52898e-42	0.62427	0.624	0.521	3.89034e-38	Hep3	LOC119577907
3.33903e-42	0.534084	0.223	0.134	5.13644e-38	Hep3	LOC119571647
6.79742e-42	0.460708	0.275	0.178	1.04565e-37	Hep3	LOC119585189
7.14205e-42	0.284219	0.976	0.915	1.09866e-37	Hep3	LOC119595505
9.18609e-42	0.481114	0.159	0.081	1.4131e-37	Hep3	LOC119592571
1.30233e-41	0.542042	0.172	0.09	2.00337e-37	Hep3	LOC119574647
1.63234e-41	0.398269	0.124	0.055	2.51103e-37	Hep3	LOC119576059
2.75476e-41	0.347529	0.532	0.414	4.23765e-37	Hep3	LOC119573312
3.72281e-41	0.480108	0.186	0.102	5.72679e-37	Hep3	LOC119583494
6.54112e-41	0.388529	0.64	0.527	1.00622e-36	Hep3	LOC119598713
1.19196e-40	2.07983	0.565	0.373	1.83359e-36	Hep3	LOC119597758
1.56911e-39	0.492355	0.408	0.31	2.41376e-35	Hep3	LOC119573053
1.42746e-38	0.334028	0.49	0.382	2.19587e-34	Hep3	LOC119579530
4.23958e-38	0.379423	0.893	0.798	6.52174e-34	Hep3	LOC119586393
6.42388e-38	0.510757	0.141	0.068	9.88185e-34	Hep3	LOC119586279
6.93267e-38	0.307149	0.115	0.051	1.06645e-33	Hep3	LOC119580143
3.00134e-37	0.34558	0.941	0.866	4.61696e-33	Hep3	LOC119594004
4.87218e-37	0.322624	0.895	0.797	7.49488e-33	Hep3	LOC119585017
5.69843e-37	0.35263	0.106	0.046	8.76589e-33	Hep3	LOC119585144
1.47465e-36	0.598536	0.25	0.165	2.26845e-32	Hep3	LOC119572303
2.30181e-36	0.441563	0.205	0.124	3.54088e-32	Hep3	LOC119597350
2.80875e-36	0.364484	0.255	0.163	4.32069e-32	Hep3	LOC119582010
9.60089e-36	0.396812	0.765	0.694	1.4769e-31	Hep3	LOC119598268
5.43722e-35	0.826066	0.459	0.367	8.36408e-31	Hep3	LOC119590711
5.53074e-35	0.470915	0.163	0.088	8.50793e-31	Hep3	LOC119596952
7.34982e-35	0.352254	0.571	0.453	1.13062e-30	Hep3	LOC119594063
4.62354e-34	0.479694	0.203	0.124	7.11239e-30	Hep3	LOC119581741
1.78049e-33	0.636507	0.217	0.129	2.73893e-29	Hep3	LOC119585863
6.05334e-33	0.387958	0.132	0.067	9.31185e-29	Hep3	LOC119582871
1.295e-32	0.347415	0.163	0.09	1.9921e-28	Hep3	LOC119585100
3.01637e-32	0.610468	0.271	0.182	4.64008e-28	Hep3	LOC119582616
3.57925e-32	0.327065	0.112	0.053	5.50596e-28	Hep3	LOC119573365
3.74166e-32	0.415732	0.204	0.121	5.7558e-28	Hep3	LOC119574149
4.08845e-32	0.390659	0.171	0.098	6.28926e-28	Hep3	LOC119597168
4.87021e-32	0.345731	0.119	0.058	7.49185e-28	Hep3	LOC119587821
6.39312e-32	0.380398	0.125	0.064	9.83454e-28	Hep3	LOC119595740
1.52062e-31	0.411799	0.262	0.181	2.33917e-27	Hep3	LOC119569478
9.30261e-31	0.46491	0.19	0.118	1.43102e-26	Hep3	LOC119578155
1.82371e-30	0.411981	0.25	0.17	2.80541e-26	Hep3	LOC119589864
5.00248e-30	0.394916	0.299	0.216	7.69532e-26	Hep3	LOC119586353
8.96351e-30	0.363626	0.199	0.123	1.37886e-25	Hep3	LOC119597740
1.06024e-29	0.469965	0.276	0.198	1.63097e-25	Hep3	LOC119568212
1.1166e-29	0.328457	0.408	0.317	1.71766e-25	Hep3	LOC119591282
1.96756e-29	0.526235	0.307	0.233	3.0267e-25	Hep3	LOC119592620
2.40178e-29	0.379575	0.439	0.362	3.69465e-25	Hep3	LOC119568243
2.94624e-29	0.299541	0.464	0.375	4.5322e-25	Hep3	LOC119590106
5.78459e-29	0.439012	0.348	0.271	8.89844e-25	Hep3	LOC119580308
9.36312e-29	0.441666	0.244	0.171	1.44033e-24	Hep3	LOC119594050
2.874e-28	0.346289	0.102	0.049	4.42107e-24	Hep3	LOC119597366
3.51927e-28	0.356554	0.171	0.102	5.41369e-24	Hep3	LOC119573268
4.04706e-28	0.464082	0.149	0.085	6.22559e-24	Hep3	LOC119584966
4.16091e-28	0.415774	0.34	0.268	6.40073e-24	Hep3	LOC119575372
8.66811e-28	0.395915	0.347	0.271	1.33342e-23	Hep3	LOC119590396
1.44111e-27	0.383385	0.233	0.163	2.21686e-23	Hep3	LOC119590651
1.62149e-27	0.380381	0.283	0.203	2.49434e-23	Hep3	LOC119575278
5.44325e-27	0.383118	0.102	0.051	8.37335e-23	Hep3	LOC119598747
5.86589e-27	0.364208	0.258	0.182	9.0235e-23	Hep3	LOC119584550
1.95407e-26	0.394035	0.156	0.093	3.00594e-22	Hep3	LOC119594899
2.49332e-26	0.391117	0.268	0.197	3.83547e-22	Hep3	LOC119585021
3.37543e-26	1.64447	0.29	0.19	5.19242e-22	Hep3	LOC119578798
1.12368e-25	0.333936	0.274	0.192	1.72856e-21	Hep3	LOC119583613
1.432e-25	0.342154	0.17	0.106	2.20285e-21	Hep3	LOC119580351
2.73366e-25	0.382855	0.239	0.168	4.20519e-21	Hep3	LOC119592564
4.5454e-25	0.332739	0.102	0.052	6.99218e-21	Hep3	LOC119598614
4.63656e-25	0.26664	0.795	0.666	7.13242e-21	Hep3	LOC119579291
5.64179e-25	0.413359	0.112	0.058	8.67876e-21	Hep3	LOC119587833
6.66692e-25	0.43701	0.218	0.151	1.02557e-20	Hep3	LOC119583489
1.63246e-24	0.323031	0.108	0.056	2.51122e-20	Hep3	LOC119576208
3.54458e-24	0.255658	0.502	0.416	5.45263e-20	Hep3	LOC119580851
3.81978e-24	0.376155	0.142	0.084	5.87596e-20	Hep3	LOC119584795
4.42482e-24	0.421867	0.284	0.219	6.8067e-20	Hep3	LOC119596987
4.7843e-24	0.362313	0.221	0.15	7.35969e-20	Hep3	LOC119597120
5.41789e-24	0.441835	0.197	0.134	8.33434e-20	Hep3	LOC119571062
6.31554e-24	0.299011	0.105	0.055	9.71519e-20	Hep3	LOC119590547
6.65288e-24	0.344097	0.217	0.15	1.02341e-19	Hep3	LOC119578821
8.60598e-24	0.300133	0.11	0.058	1.32386e-19	Hep3	LOC119583844
1.0298e-23	0.273282	0.463	0.39	1.58414e-19	Hep3	LOC119581137
2.91703e-23	0.447997	0.243	0.177	4.48727e-19	Hep3	LOC119577938
3.26655e-23	0.510437	0.186	0.125	5.02494e-19	Hep3	LOC119594391
4.82976e-23	0.274021	0.143	0.084	7.42963e-19	Hep3	LOC119582555
7.55229e-23	0.399345	0.19	0.128	1.16177e-18	Hep3	LOC119592003
8.39481e-23	0.365896	0.238	0.166	1.29137e-18	Hep3	LOC119574829
1.03053e-22	0.374602	0.156	0.098	1.58527e-18	Hep3	LOC119573126
1.41964e-22	0.344	0.183	0.12	2.18384e-18	Hep3	LOC119568342
1.5356e-22	0.377679	0.208	0.144	2.36221e-18	Hep3	LOC119572400
4.29248e-22	0.356668	0.336	0.275	6.60312e-18	Hep3	LOC119598722
5.969e-22	0.360808	0.18	0.119	9.18212e-18	Hep3	LOC119583807
6.16593e-22	0.33408	0.131	0.078	9.48505e-18	Hep3	LOC119587189
8.17954e-22	0.391199	0.309	0.245	1.25826e-17	Hep3	LOC119593993
8.8832e-22	0.358924	0.379	0.312	1.3665e-17	Hep3	LOC119592070
1.03563e-21	0.278176	0.126	0.073	1.59311e-17	Hep3	LOC119586343
1.06484e-21	0.429701	0.243	0.183	1.63805e-17	Hep3	LOC119576348
1.07793e-21	0.325229	0.103	0.056	1.65818e-17	Hep3	LOC119583263
1.25916e-21	0.340497	0.113	0.063	1.93697e-17	Hep3	LOC119573316
1.60727e-21	0.415008	0.319	0.256	2.47246e-17	Hep3	LOC119577862
1.72898e-21	0.346074	0.166	0.108	2.65969e-17	Hep3	LOC119589096
2.17781e-21	0.428689	0.174	0.116	3.35013e-17	Hep3	LOC119598109
2.53854e-21	0.307889	0.962	0.917	3.90504e-17	Hep3	LOC119586466
2.53945e-21	0.292249	0.373	0.312	3.90643e-17	Hep3	LOC119589936
2.72018e-21	0.371862	0.347	0.285	4.18446e-17	Hep3	LOC119568218
2.73618e-21	0.300586	0.124	0.071	4.20906e-17	Hep3	LOC119574938
4.4281e-21	0.362791	0.16	0.103	6.81175e-17	Hep3	LOC119585677
6.29958e-21	0.465575	0.141	0.088	9.69064e-17	Hep3	LOC119578729
7.8461e-21	0.354651	0.287	0.224	1.20697e-16	Hep3	LOC119590625
1.22922e-20	0.302693	0.105	0.058	1.89091e-16	Hep3	LOC119582534
2.82025e-20	0.304668	0.163	0.105	4.33839e-16	Hep3	LOC119581005
2.92764e-20	0.271505	0.441	0.368	4.5036e-16	Hep3	LOC119592136
5.55881e-20	0.375018	0.239	0.18	8.55112e-16	Hep3	LOC119593391
6.09004e-20	0.430597	0.157	0.104	9.36831e-16	Hep3	LOC119577860
6.66857e-20	0.333638	0.162	0.106	1.02583e-15	Hep3	LOC119585216
2.79768e-19	0.421256	0.207	0.152	4.30367e-15	Hep3	LOC119594361
3.75689e-19	0.327034	0.464	0.402	5.77922e-15	Hep3	LOC119568966
5.07157e-19	0.35614	0.181	0.126	7.8016e-15	Hep3	LOC119583346
1.72636e-18	0.26754	0.358	0.297	2.65565e-14	Hep3	LOC119583753
1.76037e-18	0.338124	0.176	0.122	2.70798e-14	Hep3	LOC119586498
3.92282e-18	0.426529	0.242	0.187	6.03448e-14	Hep3	LOC119598099
4.60378e-18	0.357744	0.281	0.223	7.082e-14	Hep3	LOC119576118
5.03544e-18	0.354204	0.189	0.135	7.74602e-14	Hep3	LOC119594671
5.78681e-18	0.349567	0.168	0.116	8.90185e-14	Hep3	LOC119593964
1.00016e-17	0.334269	0.208	0.153	1.53854e-13	Hep3	LOC119579389
2.5271e-17	0.328558	0.245	0.172	3.88744e-13	Hep3	LOC119582503
3.09611e-17	0.334922	0.139	0.09	4.76275e-13	Hep3	LOC119577755
3.10734e-17	0.271136	0.163	0.11	4.78002e-13	Hep3	LOC119576736
3.16351e-17	0.313431	0.158	0.107	4.86642e-13	Hep3	LOC119594054
3.23246e-17	0.344621	0.134	0.086	4.97249e-13	Hep3	LOC119587732
6.99056e-17	0.259158	0.374	0.318	1.07536e-12	Hep3	LOC119575321
8.77932e-17	0.267306	0.124	0.078	1.35052e-12	Hep3	LOC119579856
1.25659e-16	0.267218	0.28	0.224	1.93301e-12	Hep3	LOC119593735
1.50875e-16	0.39437	0.242	0.19	2.32091e-12	Hep3	LOC119568386
2.18522e-16	0.351244	0.108	0.065	3.36153e-12	Hep3	LOC119585581
2.25403e-16	0.510484	0.428	0.378	3.46738e-12	Hep3	LOC119580121
2.46869e-16	0.273133	0.725	0.621	3.79758e-12	Hep3	LOC119586194
2.49942e-16	0.280076	0.373	0.306	3.84486e-12	Hep3	LOC119584366
3.17107e-16	0.29497	0.298	0.246	4.87806e-12	Hep3	LOC119574214
4.15073e-16	0.328663	0.22	0.168	6.38507e-12	Hep3	LOC119571655
4.36832e-16	0.271293	0.129	0.083	6.71978e-12	Hep3	LOC119597660
4.5128e-16	0.294052	0.118	0.074	6.94203e-12	Hep3	LOC119587073
7.05166e-16	0.323056	0.196	0.146	1.08476e-11	Hep3	LOC119576799
1.03251e-15	0.285103	0.106	0.064	1.58831e-11	Hep3	LOC119574127
1.23408e-15	0.293673	0.111	0.069	1.89839e-11	Hep3	LOC119593670
1.98006e-15	0.38674	0.183	0.133	3.04593e-11	Hep3	LOC119577032
2.12582e-15	0.360641	0.259	0.211	3.27015e-11	Hep3	LOC119590829
2.40342e-15	0.342894	0.251	0.2	3.69718e-11	Hep3	LOC119570957
3.70238e-15	0.285784	0.112	0.071	5.69537e-11	Hep3	LOC119592220
3.75455e-15	0.428757	0.295	0.252	5.77562e-11	Hep3	LOC119576445
4.10444e-15	0.319267	0.144	0.099	6.31386e-11	Hep3	LOC119574707
6.47534e-15	0.262691	0.102	0.062	9.96101e-11	Hep3	LOC119572366
8.80611e-15	0.257872	0.213	0.16	1.35464e-10	Hep3	LOC119573080
1.53123e-14	0.33629	0.862	0.794	2.35549e-10	Hep3	LOC119581836
1.80389e-14	0.282375	0.237	0.189	2.77492e-10	Hep3	LOC119583435
2.05861e-14	0.282018	0.149	0.101	3.16676e-10	Hep3	LOC119587114
2.52144e-14	0.369297	0.257	0.21	3.87873e-10	Hep3	LOC119574215
3.12392e-14	0.296709	0.171	0.124	4.80552e-10	Hep3	LOC119577917
3.30171e-14	0.312726	0.252	0.206	5.07902e-10	Hep3	LOC119593740
1.26402e-13	0.280741	0.153	0.11	1.94445e-09	Hep3	LOC119593664
2.10778e-13	0.278361	0.132	0.09	3.24241e-09	Hep3	LOC119585703
4.41342e-13	0.28439	0.176	0.13	6.78917e-09	Hep3	LOC119586785
6.89099e-13	0.331515	0.2	0.157	1.06004e-08	Hep3	LOC119598137
1.07955e-12	0.310536	0.203	0.16	1.66067e-08	Hep3	LOC119584261
1.34984e-12	0.35577	0.2	0.159	2.07646e-08	Hep3	LOC119595526
1.57274e-12	0.311631	0.138	0.097	2.41934e-08	Hep3	LOC119571311
1.77533e-12	0.346663	0.264	0.225	2.73099e-08	Hep3	LOC119574302
8.36082e-12	0.266136	0.217	0.174	1.28614e-07	Hep3	LOC119598621
1.30313e-11	0.303174	0.185	0.145	2.00461e-07	Hep3	LOC119582064
1.38997e-11	0.278824	0.165	0.124	2.13819e-07	Hep3	LOC119596990
2.67711e-11	0.34821	0.153	0.114	4.11819e-07	Hep3	LOC119590701
2.71233e-11	0.417284	0.172	0.132	4.17237e-07	Hep3	LOC119581903
3.42152e-11	0.270338	0.176	0.136	5.26332e-07	Hep3	LOC119590653
4.79644e-11	0.409529	0.216	0.174	7.37836e-07	Hep3	LOC119596310
7.37185e-11	0.27864	0.134	0.097	1.13401e-06	Hep3	LOC119580166
1.10114e-10	0.277751	0.117	0.083	1.69388e-06	Hep3	LOC119577097
1.14545e-10	0.347261	0.322	0.292	1.76205e-06	Hep3	LOC119586106
1.61101e-10	0.330465	0.124	0.089	2.47822e-06	Hep3	LOC119574473
1.84936e-10	0.255805	0.104	0.07	2.84488e-06	Hep3	LOC119581116
2.84976e-10	0.264894	0.128	0.093	4.38378e-06	Hep3	LOC119598212
2.85976e-10	0.34745	0.137	0.102	4.39918e-06	Hep3	LOC119572214
3.06234e-10	0.61664	0.132	0.089	4.71079e-06	Hep3	LOC119594953
4.52601e-10	0.257426	0.168	0.131	6.96236e-06	Hep3	LOC119572382
1.0452e-09	0.290482	0.122	0.089	1.60782e-05	Hep3	LOC119589164
1.71286e-09	0.283117	0.207	0.173	2.6349e-05	Hep3	LOC119568762
2.49444e-09	0.285581	0.226	0.193	3.8372e-05	Hep3	LOC119585994
4.52454e-09	0.394075	0.163	0.131	6.9601e-05	Hep3	LOC119573372
4.86842e-09	0.301213	0.112	0.081	7.48909e-05	Hep3	LOC119589416
8.24771e-09	0.791316	0.379	0.357	0.000126875	Hep3	LOC119598656
1.2497e-08	0.253646	0.214	0.181	0.000192241	Hep3	LOC119589992
1.85334e-08	0.268248	0.136	0.105	0.000285099	Hep3	LOC119576214
2.30572e-08	0.303338	0.135	0.103	0.000354688	Hep3	LOC119580572
4.49609e-08	0.269256	0.159	0.129	0.000691634	Hep3	LOC119595077
6.11751e-08	0.29947	0.231	0.31	0.000941056	Hep3	LOC119582772
6.60671e-08	0.260208	0.181	0.149	0.00101631	Hep3	LOC119596921
8.45193e-08	0.263714	0.124	0.096	0.00130016	Hep3	LOC119587101
1.27445e-07	0.258245	0.156	0.125	0.00196048	Hep3	LOC119587079
1.35486e-07	0.267713	0.275	0.253	0.00208418	Hep3	LOC119580214
2.5472e-07	1.00961	0.101	0.072	0.00391836	Hep3	LOC119585961
3.10496e-07	0.262571	0.152	0.124	0.00477636	Hep3	LOC119592185
3.27504e-07	0.593421	0.241	0.211	0.005038	Hep3	LOC119569319
3.83656e-07	0.316513	0.19	0.164	0.00590178	Hep3	LOC119582729
4.22798e-07	0.262699	0.115	0.087	0.00650391	Hep3	LOC119591959
5.16257e-07	0.258316	0.198	0.171	0.00794159	Hep3	LOC119597256
1.65673e-06	0.317738	0.108	0.082	0.0254855	Hep3	LOC119599022
1.78497e-06	0.326084	0.115	0.089	0.0274582	Hep3	LOC119594420
2.1564e-06	0.279507	0.136	0.111	0.0331719	Hep3	LOC119598650
2.16449e-06	0.257792	0.134	0.107	0.0332963	Hep3	LOC119574565
2.6308e-06	0.261352	0.137	0.112	0.0404696	Hep3	LOC119585577
0	3.20429	0.981	0.236	0	Hep4	LOC119595873
0	3.09315	0.609	0.105	0	Hep4	LOC119575177
0	2.94573	0.985	0.253	0	Hep4	LOC119573120
0	2.82223	0.514	0.118	0	Hep4	LOC119590768
0	2.65642	0.957	0.463	0	Hep4	LOC119589094
0	2.55084	0.946	0.156	0	Hep4	LOC119594748
0	2.52109	1	0.766	0	Hep4	LOC119578139
0	2.51621	0.869	0.141	0	Hep4	LOC119597146
0	2.50094	0.436	0.063	0	Hep4	LOC119590770
0	2.45712	0.436	0.046	0	Hep4	LOC119590767
0	2.45524	0.978	0.379	0	Hep4	LOC119574297
0	2.40911	0.808	0.09	0	Hep4	LOC119581220
0	2.33234	0.912	0.172	0	Hep4	LOC119573314
0	2.25899	0.832	0.268	0	Hep4	LOC119585897
0	2.18273	0.775	0.047	0	Hep4	LOC119575182
0	2.17973	0.65	0.064	0	Hep4	LOC119592117
0	2.1113	0.414	0.054	0	Hep4	LOC119590771
0	2.10189	0.635	0.087	0	Hep4	LOC119580422
0	2.06957	0.808	0.206	0	Hep4	LOC119580327
0	2.05766	0.386	0.051	0	Hep4	LOC119590783
0	2.01977	0.963	0.182	0	Hep4	LOC119575247
0	2.01615	0.964	0.235	0	Hep4	LOC119591914
0	2.01162	0.722	0.121	0	Hep4	LOC119568240
0	1.96644	0.994	0.399	0	Hep4	LOC119590855
0	1.94311	0.55	0.093	0	Hep4	LOC119582040
0	1.90274	0.924	0.078	0	Hep4	LOC119568302
0	1.89057	0.798	0.057	0	Hep4	LOC119588661
0	1.87294	0.465	0.075	0	Hep4	LOC119579484
0	1.84908	0.976	0.23	0	Hep4	LOC119581058
0	1.84565	0.942	0.232	0	Hep4	LOC119584367
0	1.81831	0.482	0.045	0	Hep4	LOC119584421
0	1.80826	0.682	0.062	0	Hep4	LOC119579100
0	1.78264	0.683	0.045	0	Hep4	LOC119576814
0	1.77781	0.583	0.037	0	Hep4	LOC119596460
0	1.75656	0.604	0.097	0	Hep4	LOC119575165
0	1.72767	0.898	0.21	0	Hep4	LOC119581080
0	1.72291	0.982	0.499	0	Hep4	LOC119592714
0	1.70462	0.688	0.164	0	Hep4	LOC119577944
0	1.70139	0.537	0.116	0	Hep4	LOC119592124
0	1.69643	0.719	0.181	0	Hep4	LOC119590706
0	1.69356	0.525	0.09	0	Hep4	LOC119590125
0	1.6837	0.639	0.05	0	Hep4	LOC119573348
0	1.6604	0.559	0.094	0	Hep4	LOC119593373
0	1.65658	0.473	0.022	0	Hep4	LOC119575040
0	1.61883	0.881	0.213	0	Hep4	LOC119574449
0	1.60526	0.998	0.756	0	Hep4	LOC119586462
0	1.59102	0.979	0.508	0	Hep4	LOC119573278
0	1.58342	0.828	0.097	0	Hep4	LOC119568445
0	1.58229	0.504	0.069	0	Hep4	LOC119590128
0	1.58115	0.907	0.1	0	Hep4	LOC119575449
0	1.56674	0.302	0.02	0	Hep4	LOC119590778
0	1.56129	0.353	0.022	0	Hep4	LOC119573721
0	1.55423	0.657	0.035	0	Hep4	LOC119587812
0	1.49621	0.925	0.361	0	Hep4	LOC119572972
0	1.48307	0.881	0.113	0	Hep4	LOC119588435
0	1.4694	0.699	0.047	0	Hep4	LOC119573195
0	1.45967	0.923	0.242	0	Hep4	LOC119572588
0	1.43944	0.334	0.033	0	Hep4	LOC119590765
0	1.42492	0.258	0.019	0	Hep4	LOC119590774
0	1.42282	0.845	0.186	0	Hep4	LOC119586962
0	1.41165	0.98	0.283	0	Hep4	LOC119597587
0	1.40858	0.483	0.092	0	Hep4	LOC119574106
0	1.39896	0.728	0.043	0	Hep4	LOC119591599
0	1.38923	0.718	0.027	0	Hep4	LOC119581057
0	1.37877	0.906	0.133	0	Hep4	LOC119595301
0	1.36283	0.83	0.054	0	Hep4	LOC119587427
0	1.35884	0.841	0.225	0	Hep4	LOC119594136
0	1.33568	0.742	0.127	0	Hep4	LOC119599219
0	1.33326	0.895	0.236	0	Hep4	LOC119582601
0	1.32426	0.841	0.072	0	Hep4	LOC119586340
0	1.31352	0.72	0.069	0	Hep4	LOC119597083
0	1.30285	0.322	0.034	0	Hep4	LOC119590489
0	1.2911	0.716	0.082	0	Hep4	LOC119581073
0	1.28378	0.781	0.075	0	Hep4	LOC119575221
0	1.275	0.493	0.1	0	Hep4	LOC119582597
0	1.27099	0.881	0.172	0	Hep4	LOC119573375
0	1.26829	0.748	0.114	0	Hep4	LOC119575164
0	1.26823	0.494	0.051	0	Hep4	LOC119585898
0	1.26063	0.867	0.299	0	Hep4	LOC119589787
0	1.23079	0.968	0.374	0	Hep4	LOC119587149
0	1.22159	0.438	0.03	0	Hep4	LOC119587903
0	1.21226	0.996	0.758	0	Hep4	LOC119576185
0	1.2064	0.617	0.026	0	Hep4	LOC119589290
0	1.20633	0.641	0.144	0	Hep4	LOC119584474
0	1.20201	0.864	0.242	0	Hep4	LOC119599021
0	1.19777	0.54	0.046	0	Hep4	LOC119579311
0	1.1787	0.9	0.354	0	Hep4	LOC119599367
0	1.17189	0.317	0.018	0	Hep4	LOC119594495
0	1.17085	0.471	0.034	0	Hep4	LOC119598345
0	1.1611	0.594	0.026	0	Hep4	LOC119580503
0	1.14936	0.938	0.273	0	Hep4	LOC119597109
0	1.14745	0.912	0.221	0	Hep4	LOC119596323
0	1.14524	0.689	0.161	0	Hep4	LOC119598869
0	1.13897	0.812	0.191	0	Hep4	LOC119573315
0	1.13693	0.61	0.04	0	Hep4	LOC119594874
0	1.12852	0.672	0.078	0	Hep4	LOC119585850
0	1.12243	0.463	0.077	0	Hep4	LOC119579508
0	1.11093	0.593	0.087	0	Hep4	LOC119568400
0	1.11082	0.675	0.053	0	Hep4	LOC119574660
0	1.10894	0.633	0.063	0	Hep4	LOC119590865
0	1.09663	0.605	0.046	0	Hep4	LOC119573007
0	1.08723	0.962	0.318	0	Hep4	LOC119580803
0	1.08362	0.83	0.157	0	Hep4	LOC119582616
0	1.08092	0.644	0.087	0	Hep4	LOC119592656
0	1.07818	0.633	0.032	0	Hep4	LOC119590027
0	1.07285	0.829	0.121	0	Hep4	LOC119588557
0	1.06974	0.783	0.109	0	Hep4	LOC119587803
0	1.06535	0.869	0.219	0	Hep4	LOC119585128
0	1.06393	1	0.816	0	Hep4	LOC119585865
0	1.05814	0.392	0.019	0	Hep4	LOC119590988
0	1.0457	0.926	0.28	0	Hep4	LOC119598594
0	1.04157	0.437	0.011	0	Hep4	LOC119584052
0	1.03826	0.663	0.03	0	Hep4	LOC119584823
0	1.0361	0.297	0.022	0	Hep4	LOC119572227
0	1.03132	0.695	0.157	0	Hep4	LOC119576301
0	1.02791	0.775	0.138	0	Hep4	LOC119598634
0	1.02679	0.513	0.029	0	Hep4	LOC119586481
0	1.0252	0.526	0.09	0	Hep4	LOC119576080
0	1.02407	0.682	0.028	0	Hep4	LOC119572389
0	1.02173	0.633	0.1	0	Hep4	LOC119590557
0	1.01939	0.83	0.196	0	Hep4	LOC119583493
0	1.01925	0.594	0.031	0	Hep4	LOC119583848
0	1.0178	0.807	0.159	0	Hep4	LOC119578978
0	1.01237	0.461	0.08	0	Hep4	LOC119580450
0	1.00641	0.794	0.146	0	Hep4	LOC119596310
0	1.00547	0.605	0.032	0	Hep4	LOC119577127
0	0.996413	0.88	0.23	0	Hep4	LOC119591590
0	0.993589	0.87	0.166	0	Hep4	LOC119583613
0	0.989696	0.877	0.307	0	Hep4	LOC119570894
0	0.988267	0.803	0.16	0	Hep4	LOC119577132
0	0.986044	0.572	0.095	0	Hep4	LOC119594514
0	0.985344	0.413	0.041	0	Hep4	LOC119572391
0	0.984712	0.755	0.21	0	Hep4	LOC119582682
0	0.983211	0.479	0.093	0	Hep4	LOC119582639
0	0.981996	0.437	0.072	0	Hep4	LOC119578646
0	0.975635	0.536	0.045	0	Hep4	LOC119581904
0	0.975376	0.579	0.108	0	Hep4	LOC119596802
0	0.97479	0.61	0.095	0	Hep4	LOC119595128
0	0.973654	0.639	0.043	0	Hep4	LOC119575380
0	0.968861	0.393	0.011	0	Hep4	LOC119583423
0	0.968216	0.616	0.108	0	Hep4	LOC119582578
0	0.963877	0.402	0.023	0	Hep4	LOC119590793
0	0.962858	0.259	0.015	0	Hep4	LOC119581008
0	0.961784	0.403	0.03	0	Hep4	LOC119581226
0	0.95513	0.881	0.201	0	Hep4	LOC119580865
0	0.951658	0.614	0.059	0	Hep4	LOC119575127
0	0.951468	0.935	0.378	0	Hep4	LOC119594454
0	0.946615	0.403	0.03	0	Hep4	LOC119585891
0	0.945364	0.439	0.06	0	Hep4	LOC119586331
0	0.943655	0.196	0.005	0	Hep4	LOC119582637
0	0.942084	0.596	0.029	0	Hep4	LOC119594126
0	0.937959	0.417	0.054	0	Hep4	LOC119578168
0	0.934196	0.705	0.092	0	Hep4	LOC119584663
0	0.932427	0.555	0.07	0	Hep4	LOC119581929
0	0.931762	1	0.915	0	Hep4	LOC119581758
0	0.931413	0.616	0.141	0	Hep4	LOC119582051
0	0.930103	0.342	0.012	0	Hep4	LOC119575504
0	0.930094	0.532	0.019	0	Hep4	LOC119576096
0	0.9257	0.571	0.018	0	Hep4	LOC119599456
0	0.92002	0.778	0.179	0	Hep4	LOC119574440
0	0.915915	1	0.889	0	Hep4	LOC119576797
0	0.915862	0.434	0.011	0	Hep4	LOC119591595
0	0.90641	0.428	0.008	0	Hep4	LOC119573381
0	0.90295	0.788	0.108	0	Hep4	LOC119597656
0	0.901195	0.382	0.034	0	Hep4	LOC119585896
0	0.89895	0.631	0.109	0	Hep4	LOC119572192
0	0.897782	0.563	0.032	0	Hep4	LOC119594580
0	0.895999	1	0.946	0	Hep4	LOC119585875
0	0.894903	0.471	0.026	0	Hep4	LOC119588500
0	0.886166	0.999	0.98	0	Hep4	LOC119595388
0	0.882203	0.683	0.15	0	Hep4	LOC119582765
0	0.881855	0.679	0.077	0	Hep4	LOC119581760
0	0.879396	0.418	0.047	0	Hep4	LOC119585027
0	0.877629	0.644	0.093	0	Hep4	LOC119583685
0	0.87625	0.652	0.17	0	Hep4	LOC119592997
0	0.874616	0.607	0.032	0	Hep4	LOC119583791
0	0.872244	0.56	0.097	0	Hep4	LOC119577150
0	0.869486	0.638	0.042	0	Hep4	LOC119592567
0	0.864478	0.434	0.032	0	Hep4	LOC119569923
0	0.861468	0.876	0.269	0	Hep4	LOC119586415
0	0.861062	0.734	0.148	0	Hep4	LOC119576831
0	0.851267	0.285	0.029	0	Hep4	LOC119585849
0	0.851082	0.43	0.019	0	Hep4	LOC119595857
0	0.850832	0.671	0.097	0	Hep4	LOC119581602
0	0.849704	0.519	0.046	0	Hep4	LOC119591588
0	0.847213	0.457	0.055	0	Hep4	LOC119594134
0	0.846952	0.628	0.032	0	Hep4	LOC119573071
0	0.846564	0.775	0.246	0	Hep4	LOC119580340
0	0.846325	0.35	0.015	0	Hep4	LOC119581206
0	0.845866	0.613	0.047	0	Hep4	LOC119593032
0	0.837305	0.637	0.042	0	Hep4	LOC119575216
0	0.828064	0.555	0.069	0	Hep4	LOC119575361
0	0.826966	0.928	0.296	0	Hep4	LOC119569203
0	0.824076	0.616	0.048	0	Hep4	LOC119590018
0	0.822386	0.699	0.148	0	Hep4	LOC119598233
0	0.820858	0.803	0.194	0	Hep4	LOC119586353
0	0.815803	0.616	0.065	0	Hep4	LOC119584368
0	0.81073	0.541	0.03	0	Hep4	LOC119587699
0	0.808933	0.723	0.133	0	Hep4	LOC119584465
0	0.804745	0.823	0.203	0	Hep4	LOC119576101
0	0.799639	0.753	0.21	0	Hep4	LOC119594660
0	0.799002	0.772	0.226	0	Hep4	LOC119592376
0	0.797475	0.597	0.054	0	Hep4	LOC119588643
0	0.79616	0.585	0.058	0	Hep4	LOC119599022
0	0.791139	0.764	0.151	0	Hep4	LOC119593043
0	0.787387	0.688	0.126	0	Hep4	LOC119594295
0	0.784376	0.49	0.014	0	Hep4	LOC119582777
0	0.783748	0.503	0.016	0	Hep4	LOC119578007
0	0.781427	0.77	0.203	0	Hep4	LOC119574376
0	0.780634	0.556	0.022	0	Hep4	LOC119599521
0	0.779343	0.713	0.152	0	Hep4	LOC119570189
0	0.777776	0.571	0.056	0	Hep4	LOC119593074
0	0.77769	0.561	0.123	0	Hep4	LOC119585714
0	0.777371	0.507	0.028	0	Hep4	LOC119579224
0	0.776729	0.399	0.062	0	Hep4	LOC119579426
0	0.775002	0.467	0.073	0	Hep4	LOC119577956
0	0.774288	0.716	0.136	0	Hep4	LOC119580088
0	0.768755	0.935	0.334	0	Hep4	LOC119574596
0	0.767512	0.697	0.1	0	Hep4	LOC119574425
0	0.765045	0.886	0.291	0	Hep4	LOC119589145
0	0.764727	0.536	0.091	0	Hep4	LOC119574366
0	0.762762	0.5	0.012	0	Hep4	LOC119577610
0	0.762076	0.492	0.015	0	Hep4	LOC119584633
0	0.759727	0.499	0.039	0	Hep4	LOC119585794
0	0.758539	0.765	0.186	0	Hep4	LOC119585687
0	0.755622	0.839	0.252	0	Hep4	LOC119580405
0	0.752629	0.355	0.026	0	Hep4	LOC119581100
0	0.749973	0.495	0.025	0	Hep4	LOC119580101
0	0.748196	0.553	0.055	0	Hep4	LOC119575081
0	0.746003	0.446	0.022	0	Hep4	LOC119592029
0	0.745671	0.56	0.024	0	Hep4	LOC119572251
0	0.744763	0.456	0.015	0	Hep4	LOC119575276
0	0.74383	0.355	0.009	0	Hep4	LOC119574475
0	0.743297	0.673	0.176	0	Hep4	LOC119585822
0	0.741589	0.476	0.047	0	Hep4	LOC119581889
0	0.741273	0.827	0.175	0	Hep4	LOC119584743
0	0.739577	0.615	0.069	0	Hep4	LOC119570580
0	0.739457	0.758	0.117	0	Hep4	LOC119590124
0	0.739129	0.6	0.147	0	Hep4	LOC119574157
0	0.738536	0.538	0.041	0	Hep4	LOC119588486
0	0.738174	0.496	0.039	0	Hep4	LOC119596966
0	0.736031	0.641	0.081	0	Hep4	LOC119578805
0	0.731686	0.369	0.007	0	Hep4	LOC119582302
0	0.726407	0.673	0.1	0	Hep4	LOC119589901
0	0.725581	0.557	0.052	0	Hep4	LOC119586798
0	0.723983	0.751	0.176	0	Hep4	LOC119584365
0	0.718584	0.803	0.238	0	Hep4	LOC119598005
0	0.711283	0.601	0.067	0	Hep4	LOC119575105
0	0.704532	0.845	0.259	0	Hep4	LOC119585627
0	0.70364	0.604	0.058	0	Hep4	LOC119597585
0	0.702209	0.543	0.066	0	Hep4	LOC119584795
0	0.701753	0.337	0.021	0	Hep4	LOC119591939
0	0.699794	0.537	0.081	0	Hep4	LOC119577166
0	0.690032	0.385	0.025	0	Hep4	LOC119582598
0	0.686683	0.503	0.098	0	Hep4	LOC119580006
0	0.685825	0.514	0.058	0	Hep4	LOC119591911
0	0.685253	0.443	0.06	0	Hep4	LOC119572220
0	0.684123	0.579	0.053	0	Hep4	LOC119587108
0	0.681066	0.795	0.211	0	Hep4	LOC119586822
0	0.679845	0.805	0.215	0	Hep4	LOC119581146
0	0.677655	0.15	0.004	0	Hep4	LOC119582636
0	0.675985	0.527	0.02	0	Hep4	LOC119591592
0	0.675637	0.434	0.009	0	Hep4	LOC119590383
0	0.673396	0.37	0.016	0	Hep4	LOC119580318
0	0.67243	0.587	0.068	0	Hep4	LOC119574671
0	0.671408	0.316	0.019	0	Hep4	LOC119572351
0	0.670702	0.661	0.109	0	Hep4	LOC119594601
0	0.667205	0.44	0.01	0	Hep4	LOC119585566
0	0.665668	0.65	0.131	0	Hep4	LOC119584334
0	0.665608	0.536	0.059	0	Hep4	LOC119580871
0	0.662549	0.764	0.214	0	Hep4	LOC119580220
0	0.66205	0.721	0.179	0	Hep4	LOC119581924
0	0.658803	0.517	0.036	0	Hep4	LOC119591884
0	0.654017	0.546	0.068	0	Hep4	LOC119594420
0	0.653992	0.721	0.172	0	Hep4	LOC119588076
0	0.653856	0.659	0.109	0	Hep4	LOC119581903
0	0.653361	0.531	0.109	0	Hep4	LOC119580904
0	0.65105	0.529	0.064	0	Hep4	LOC119590723
0	0.651029	0.775	0.204	0	Hep4	LOC119573376
0	0.643911	0.775	0.204	0	Hep4	LOC119596375
0	0.64302	0.495	0.028	0	Hep4	LOC119586511
0	0.641737	0.568	0.083	0	Hep4	LOC119597928
0	0.639616	0.548	0.089	0	Hep4	LOC119594195
0	0.639598	0.492	0.077	0	Hep4	LOC119595576
0	0.637376	0.467	0.064	0	Hep4	LOC119574364
0	0.636035	0.407	0.011	0	Hep4	LOC119590127
0	0.635156	0.527	0.067	0	Hep4	LOC119596086
0	0.633177	0.741	0.203	0	Hep4	LOC119576118
0	0.632458	0.336	0.01	0	Hep4	LOC119578786
0	0.629467	0.659	0.159	0	Hep4	LOC119577938
0	0.629218	0.712	0.159	0	Hep4	LOC119583339
0	0.627866	0.431	0.012	0	Hep4	LOC119592014
0	0.626232	0.511	0.034	0	Hep4	LOC119579421
0	0.624739	0.349	0.014	0	Hep4	LOC119582807
0	0.623746	0.544	0.067	0	Hep4	LOC119582555
0	0.622942	0.783	0.219	0	Hep4	LOC119568375
0	0.621269	0.564	0.104	0	Hep4	LOC119588832
0	0.620839	0.496	0.048	0	Hep4	LOC119582776
0	0.620534	0.629	0.133	0	Hep4	LOC119584379
0	0.619611	0.571	0.075	0	Hep4	LOC119586628
0	0.61916	0.573	0.08	0	Hep4	LOC119573187
0	0.617878	0.512	0.041	0	Hep4	LOC119599298
0	0.616916	0.434	0.07	0	Hep4	LOC119584380
0	0.614856	0.466	0.023	0	Hep4	LOC119586339
0	0.61362	0.722	0.145	0	Hep4	LOC119577792
0	0.613169	0.525	0.058	0	Hep4	LOC119576296
0	0.612175	0.447	0.042	0	Hep4	LOC119577885
0	0.608988	0.315	0.028	0	Hep4	LOC119596942
0	0.606845	0.633	0.11	0	Hep4	LOC119575884
0	0.606822	0.232	0.013	0	Hep4	LOC119596466
0	0.606224	0.595	0.084	0	Hep4	LOC119574565
0	0.604978	0.401	0.009	0	Hep4	LOC119588718
0	0.602809	0.601	0.08	0	Hep4	LOC119580572
0	0.601402	0.487	0.051	0	Hep4	LOC119591485
0	0.598898	0.479	0.096	0	Hep4	LOC119580779
0	0.597312	0.256	0.007	0	Hep4	LOC119590773
0	0.595046	0.239	0.011	0	Hep4	LOC119568183
0	0.59363	0.545	0.106	0	Hep4	LOC119576402
0	0.593629	0.652	0.102	0	Hep4	LOC119592107
0	0.593589	0.674	0.129	0	Hep4	LOC119583695
0	0.590553	0.557	0.099	0	Hep4	LOC119573186
0	0.589301	0.404	0.009	0	Hep4	LOC119591119
0	0.588588	0.749	0.181	0	Hep4	LOC119598970
0	0.583729	0.486	0.032	0	Hep4	LOC119572333
0	0.583014	0.558	0.059	0	Hep4	LOC119589416
0	0.582701	0.643	0.159	0	Hep4	LOC119587801
0	0.582692	0.273	0.005	0	Hep4	LOC119594178
0	0.582115	0.564	0.072	0	Hep4	LOC119585855
0	0.578008	0.582	0.083	0	Hep4	LOC119596962
0	0.575188	0.49	0.056	0	Hep4	LOC119577954
0	0.571852	0.439	0.042	0	Hep4	LOC119573384
0	0.570663	0.714	0.172	0	Hep4	LOC119575252
0	0.570598	0.561	0.092	0	Hep4	LOC119581897
0	0.568575	0.206	0.008	0	Hep4	LOC119590766
0	0.561175	0.506	0.036	0	Hep4	LOC119590182
0	0.560921	0.299	0.004	0	Hep4	LOC119599439
0	0.55964	0.351	0.05	0	Hep4	LOC119572340
0	0.559619	0.71	0.164	0	Hep4	LOC119586823
0	0.558775	0.512	0.063	0	Hep4	LOC119589932
0	0.553212	0.397	0.025	0	Hep4	LOC119580889
0	0.552213	0.266	0.008	0	Hep4	LOC119579078
0	0.550249	0.43	0.043	0	Hep4	LOC119588729
[truncated: 2,080 more rows]

## Sheet: Table2_hemocytes_sig_marker
p_val	avg_log2FC	pct.1	pct.2	p_val_adj	cluster	gene
0	3.02058	0.534	0.181	0	Hem1	LOC119584358
0	2.89386	0.636	0.211	0	Hem1	LOC119584357
0	2.27826	0.941	0.455	0	Hem1	LOC119589377
0	2.27085	0.915	0.38	0	Hem1	LOC119584196
0	2.24215	0.884	0.527	0	Hem1	LOC119583362
0	1.91625	0.689	0.217	0	Hem1	LOC119576786
0	1.903	0.995	0.762	0	Hem1	LOC119591270
0	1.75875	0.876	0.407	0	Hem1	LOC119578000
0	1.70096	0.359	0.084	0	Hem1	LOC119584187
0	1.56933	0.986	0.779	0	Hem1	LOC119594945
0	1.5546	0.951	0.592	0	Hem1	LOC119594820
0	1.52767	0.981	0.689	0	Hem1	LOC119597587
0	1.51482	0.976	0.799	0	Hem1	LOC119593484
0	1.51048	0.922	0.628	0	Hem1	LOC119574698
0	1.48246	0.331	0.067	0	Hem1	LOC119597422
0	1.45958	0.856	0.426	0	Hem1	LOC119589839
0	1.39823	0.645	0.216	0	Hem1	LOC119581969
0	1.39282	0.972	0.709	0	Hem1	LOC119594980
0	1.38967	0.774	0.293	0	Hem1	LOC119584197
0	1.33265	0.965	0.693	0	Hem1	LOC119580803
0	1.30916	0.992	0.851	0	Hem1	LOC119572332
0	1.29873	0.627	0.124	0	Hem1	LOC119572606
0	1.08766	0.866	0.569	0	Hem1	LOC119581923
0	1.00037	0.583	0.198	0	Hem1	LOC119571124
0	0.964883	0.774	0.415	0	Hem1	LOC119586106
0	0.949676	0.842	0.447	0	Hem1	LOC119580447
0	0.887321	0.699	0.323	0	Hem1	LOC119590662
0	0.860895	0.994	0.899	0	Hem1	LOC119587996
0	0.813226	0.355	0.072	0	Hem1	LOC119575164
0	0.735667	0.485	0.167	0	Hem1	LOC119574328
0	0.705692	0.776	0.434	0	Hem1	LOC119568966
0	0.704932	0.989	0.899	0	Hem1	LOC119581839
0	0.693123	0.99	0.918	0	Hem1	LOC119573278
0	0.680887	0.592	0.162	0	Hem1	LOC119598690
0	0.650627	0.993	0.913	0	Hem1	LOC119585602
0	0.644263	0.976	0.828	0	Hem1	LOC119594155
0	0.617221	0.996	0.976	0	Hem1	LOC119575425
0	0.5954	0.688	0.209	0	Hem1	LOC119578800
0	0.581933	0.986	0.877	0	Hem1	LOC119572028
0	0.471502	0.995	0.968	0	Hem1	LOC119593195
0	0.468828	0.999	0.994	0	Hem1	LOC119589065
2.03625e-307	0.43627	0.953	0.786	3.13236e-303	Hem1	LOC119590855
2.51167e-307	1.00538	0.957	0.833	3.86371e-303	Hem1	LOC119595136
6.69329e-306	0.670686	0.958	0.683	1.02963e-301	Hem1	LOC119578139
4.544e-301	0.632407	0.953	0.805	6.99004e-297	Hem1	LOC119587148
1.92394e-299	0.596894	0.969	0.825	2.9596e-295	Hem1	LOC119585127
4.00146e-297	0.602089	0.991	0.902	6.15545e-293	Hem1	LOC119580903
2.94251e-296	0.649223	0.959	0.743	4.52646e-292	Hem1	LOC119586194
3.54377e-286	1.0474	0.893	0.751	5.45139e-282	Hem1	LOC119583573
8.22762e-286	0.702965	0.9	0.689	1.26565e-281	Hem1	LOC119575025
9.65657e-281	0.641885	0.807	0.497	1.48547e-276	Hem1	LOC119581000
2.79699e-279	0.517019	0.994	0.948	4.30261e-275	Hem1	LOC119581836
4.06167e-279	0.623854	0.851	0.564	6.24807e-275	Hem1	LOC119576776
9.24778e-270	0.669784	0.768	0.477	1.42259e-265	Hem1	LOC119574570
7.2607e-269	0.494362	0.997	0.983	1.11691e-264	Hem1	LOC119575160
4.04979e-268	0.48117	0.658	0.319	6.22979e-264	Hem1	LOC119572330
8.2811e-264	0.387296	0.962	0.807	1.27388e-259	Hem1	LOC119583831
2.11848e-262	0.540833	0.6	0.277	3.25887e-258	Hem1	LOC119588608
4.55475e-259	0.359408	1	0.978	7.00658e-255	Hem1	LOC119584010
2.96121e-258	0.604179	0.354	0.103	4.55524e-254	Hem1	LOC119584795
1.98385e-257	1.57989	0.19	0.018	3.05176e-253	Hem1	LOC119580236
9.07552e-253	0.580324	0.875	0.616	1.39609e-248	Hem1	LOC119589931
7.54996e-245	0.597675	0.715	0.397	1.16141e-240	Hem1	LOC119589083
2.73935e-244	0.700141	0.465	0.196	4.21394e-240	Hem1	LOC119593833
1.33184e-241	0.433829	0.999	0.973	2.04877e-237	Hem1	LOC119583785
1.29997e-240	0.516663	0.948	0.804	1.99974e-236	Hem1	LOC119583403
6.4899e-237	0.491723	0.959	0.812	9.98341e-233	Hem1	LOC119573208
6.56531e-234	0.574763	0.893	0.671	1.00994e-229	Hem1	LOC119579419
1.60815e-232	0.572128	0.897	0.65	2.47381e-228	Hem1	LOC119580407
1.07612e-231	0.529083	0.367	0.122	1.65539e-227	Hem1	LOC119587079
1.92403e-230	0.54142	0.936	0.742	2.95974e-226	Hem1	LOC119589824
5.39085e-229	0.502106	0.354	0.114	8.29275e-225	Hem1	LOC119591531
7.75802e-227	0.637432	0.8	0.54	1.19342e-222	Hem1	LOC119591282
1.25988e-225	0.67279	0.445	0.189	1.93808e-221	Hem1	LOC119575367
3.80278e-224	0.398964	0.999	0.99	5.84982e-220	Hem1	LOC119589496
2.41821e-223	0.433191	0.983	0.914	3.71994e-219	Hem1	LOC119572230
1.38907e-222	0.559025	0.904	0.664	2.13681e-218	Hem1	LOC119571536
1.69955e-220	0.621322	0.719	0.434	2.61441e-216	Hem1	LOC119585695
6.10751e-214	0.438129	0.995	0.951	9.39519e-210	Hem1	LOC119592750
8.29887e-211	0.530519	0.789	0.546	1.27662e-206	Hem1	LOC119597040
5.42402e-210	0.853368	0.78	0.546	8.34376e-206	Hem1	LOC119584283
1.94298e-209	0.46463	0.971	0.866	2.98889e-205	Hem1	LOC119593022
5.46535e-208	0.613242	0.999	0.959	8.40735e-204	Hem1	LOC119585720
4.51444e-205	0.478397	0.874	0.662	6.94457e-201	Hem1	LOC119580084
4.73768e-205	0.503848	0.827	0.564	7.28798e-201	Hem1	LOC119582727
1.01138e-201	0.498101	0.474	0.211	1.5558e-197	Hem1	LOC119598930
1.15886e-200	0.599046	0.625	0.349	1.78267e-196	Hem1	LOC119576112
1.46668e-200	0.459665	0.959	0.833	2.25619e-196	Hem1	LOC119570149
2.28494e-200	0.360411	0.296	0.084	3.51493e-196	Hem1	LOC119576369
8.06581e-197	0.532588	0.902	0.714	1.24076e-192	Hem1	LOC119598121
2.80903e-196	0.907146	0.948	0.888	4.32114e-192	Hem1	LOC119568359
1.73841e-194	0.479576	0.897	0.707	2.6742e-190	Hem1	LOC119572393
2.8563e-194	0.363453	0.714	0.417	4.39384e-190	Hem1	LOC119590722
1.35339e-193	2.23303	0.44	0.212	2.08191e-189	Hem1	LOC119598866
1.54456e-190	0.656096	0.939	0.818	2.376e-186	Hem1	LOC119594595
6.20186e-190	0.528702	0.648	0.375	9.54032e-186	Hem1	LOC119583834
5.81307e-187	0.449203	0.287	0.09	8.94225e-183	Hem1	LOC119591947
1.10919e-185	0.53554	0.966	0.894	1.70626e-181	Hem1	LOC119594415
2.91421e-184	0.515157	0.217	0.051	4.48293e-180	Hem1	LOC119589798
1.55346e-181	0.416052	0.993	0.923	2.38969e-177	Hem1	LOC119577044
2.92069e-181	0.469818	0.923	0.716	4.4929e-177	Hem1	LOC119584363
3.46324e-181	0.571156	0.616	0.36	5.3275e-177	Hem1	LOC119581472
5.08098e-180	0.363304	0.174	0.028	7.81607e-176	Hem1	LOC119584282
2.2719e-178	0.387315	0.954	0.829	3.49487e-174	Hem1	LOC119592721
5.34155e-178	0.463604	0.815	0.573	8.2169e-174	Hem1	LOC119583654
3.2918e-177	0.569157	0.996	0.957	5.06378e-173	Hem1	LOC119585805
5.39436e-177	0.460388	0.681	0.406	8.29814e-173	Hem1	LOC119597843
4.94184e-176	0.480558	0.521	0.266	7.60203e-172	Hem1	LOC119575134
9.02251e-175	0.462927	0.938	0.795	1.38793e-170	Hem1	LOC119572381
2.22144e-174	0.386646	0.992	0.924	3.41724e-170	Hem1	LOC119580879
9.44024e-174	0.465119	0.756	0.493	1.45219e-169	Hem1	LOC119584366
1.02791e-173	0.499091	0.717	0.461	1.58123e-169	Hem1	LOC119574884
5.5219e-173	0.518	0.719	0.477	8.49433e-169	Hem1	LOC119578709
6.60175e-171	0.479497	0.63	0.364	1.01555e-166	Hem1	LOC119596914
1.07014e-169	0.386797	0.174	0.032	1.6462e-165	Hem1	LOC119576982
2.24869e-169	0.553555	0.676	0.418	3.45916e-165	Hem1	LOC119588769
3.53859e-169	0.627073	0.347	0.141	5.44341e-165	Hem1	LOC119581116
1.01597e-168	0.337989	0.999	0.99	1.56287e-164	Hem1	LOC119595505
1.27387e-168	0.330434	0.998	0.991	1.95959e-164	Hem1	LOC119575502
7.79679e-168	0.365708	0.994	0.961	1.19938e-163	Hem1	LOC119573193
2.53378e-167	0.39096	0.998	0.963	3.89771e-163	Hem1	LOC119590974
4.97678e-167	0.942989	0.707	0.517	7.65578e-163	Hem1	LOC119599015
6.2703e-167	0.538318	0.301	0.105	9.64559e-163	Hem1	LOC119592137
4.42193e-166	0.48767	0.483	0.241	6.80226e-162	Hem1	LOC119591246
6.51274e-166	0.423581	0.952	0.833	1.00185e-161	Hem1	LOC119578583
8.43389e-166	0.465917	0.899	0.693	1.29739e-161	Hem1	LOC119596326
4.20799e-165	0.454498	0.79	0.537	6.47315e-161	Hem1	LOC119589059
9.78406e-165	0.358084	0.308	0.108	1.50508e-160	Hem1	LOC119585863
8.37326e-164	0.446279	0.88	0.683	1.28806e-159	Hem1	LOC119586470
1.58278e-163	1.04411	0.213	0.055	2.43479e-159	Hem1	LOC119574133
3.08151e-163	0.380498	0.994	0.948	4.74029e-159	Hem1	LOC119597604
3.24681e-163	0.436222	0.948	0.812	4.99457e-159	Hem1	LOC119574978
2.95189e-162	0.42981	0.952	0.802	4.54089e-158	Hem1	LOC119582436
2.22676e-161	0.416808	0.928	0.758	3.42543e-157	Hem1	LOC119586380
2.62203e-161	0.479024	0.672	0.413	4.03346e-157	Hem1	LOC119592092
1.06973e-160	0.417129	0.888	0.691	1.64557e-156	Hem1	LOC119580271
1.74101e-159	0.502769	0.441	0.214	2.67819e-155	Hem1	LOC119586785
1.59632e-157	2.14405	0.63	0.49	2.45562e-153	Hem1	LOC119599100
1.70405e-157	0.391665	0.994	0.94	2.62134e-153	Hem1	LOC119581133
2.95125e-157	0.430848	0.939	0.811	4.5399e-153	Hem1	LOC119575655
2.9467e-155	0.404105	0.993	0.922	4.53291e-151	Hem1	LOC119590070
1.29835e-154	0.5395	0.617	0.374	1.99725e-150	Hem1	LOC119599033
2.5419e-154	0.453914	0.861	0.648	3.9102e-150	Hem1	LOC119572218
3.12649e-154	0.34355	0.213	0.057	4.80949e-150	Hem1	LOC119594107
5.30547e-154	0.439216	0.875	0.674	8.1614e-150	Hem1	LOC119583770
8.133e-154	0.467711	0.182	0.041	1.2511e-149	Hem1	LOC119577127
5.81793e-153	0.381528	0.985	0.909	8.94973e-149	Hem1	LOC119581582
3.14799e-152	0.388605	0.355	0.15	4.84255e-148	Hem1	LOC119589965
8.4362e-152	0.404083	0.637	0.39	1.29774e-147	Hem1	LOC119586966
5.53063e-151	0.401289	0.989	0.922	8.50776e-147	Hem1	LOC119582501
6.3841e-151	0.457166	0.149	0.025	9.82067e-147	Hem1	LOC119574699
7.78682e-151	0.389443	0.947	0.811	1.19785e-146	Hem1	LOC119597104
7.20211e-149	0.380161	0.972	0.842	1.1079e-144	Hem1	LOC119586385
4.70234e-148	0.357235	0.192	0.048	7.2336e-144	Hem1	LOC119582031
7.10911e-148	0.399829	0.379	0.171	1.09359e-143	Hem1	LOC119598693
8.27749e-148	0.356902	0.105	0.007	1.27333e-143	Hem1	LOC119591127
1.58191e-146	0.382631	0.992	0.915	2.43345e-142	Hem1	LOC119586393
6.21069e-146	0.380603	0.984	0.903	9.5539e-142	Hem1	LOC119587043
1.00109e-145	0.354657	0.995	0.966	1.53997e-141	Hem1	LOC119592465
1.8183e-144	0.80868	0.535	0.323	2.79709e-140	Hem1	LOC119581054
7.02002e-144	0.390823	0.929	0.776	1.07989e-139	Hem1	LOC119596065
1.15204e-143	0.393916	0.501	0.268	1.77219e-139	Hem1	LOC119568422
2.7364e-143	0.452464	0.823	0.62	4.2094e-139	Hem1	LOC119572976
7.60351e-142	0.320543	0.229	0.072	1.16965e-137	Hem1	LOC119594946
9.20607e-140	0.303577	0.499	0.259	1.41617e-135	Hem1	LOC119591322
3.77749e-139	0.392342	0.811	0.599	5.81091e-135	Hem1	LOC119568238
4.65681e-139	0.36596	0.977	0.886	7.16356e-135	Hem1	LOC119579291
1.00005e-138	0.348346	0.99	0.932	1.53837e-134	Hem1	LOC119575427
1.16279e-138	0.510257	0.706	0.485	1.78872e-134	Hem1	LOC119582026
1.34724e-138	0.385618	0.904	0.722	2.07246e-134	Hem1	LOC119593663
1.93198e-138	0.450946	0.325	0.138	2.97197e-134	Hem1	LOC119571063
3.5362e-137	0.34692	0.996	0.957	5.43973e-133	Hem1	LOC119575018
7.33419e-137	0.438294	0.746	0.518	1.12822e-132	Hem1	LOC119576388
3.87479e-136	0.378125	0.774	0.543	5.96058e-132	Hem1	LOC119580002
4.54904e-136	0.375953	0.926	0.753	6.99778e-132	Hem1	LOC119576137
6.9243e-136	0.362861	0.991	0.909	1.06516e-131	Hem1	LOC119580878
2.81081e-135	0.399972	0.625	0.389	4.32388e-131	Hem1	LOC119597033
4.74497e-135	0.912834	0.194	0.056	7.29919e-131	Hem1	LOC119599102
1.84895e-134	0.474722	0.659	0.438	2.84423e-130	Hem1	LOC119574941
1.12478e-133	0.277139	0.994	0.974	1.73026e-129	Hem1	LOC119594951
1.39153e-133	0.377374	0.442	0.223	2.14058e-129	Hem1	LOC119592571
3.98855e-133	0.368679	0.797	0.566	6.13558e-129	Hem1	LOC119582461
6.0321e-133	0.353542	0.992	0.929	9.27918e-129	Hem1	LOC119594677
1.01193e-132	0.322223	0.435	0.226	1.55666e-128	Hem1	LOC119572450
2.87284e-132	0.557923	0.131	0.022	4.41929e-128	Hem1	LOC119587595
2.92229e-132	0.27106	0.121	0.017	4.49537e-128	Hem1	LOC119582586
3.74187e-132	0.367186	0.914	0.736	5.75612e-128	Hem1	LOC119584804
5.07111e-132	0.40284	0.737	0.515	7.80089e-128	Hem1	LOC119583679
1.0072e-130	0.581119	0.15	0.032	1.54938e-126	Hem1	LOC119572300
1.26156e-130	0.754999	0.277	0.112	1.94065e-126	Hem1	LOC119594100
1.28864e-130	0.335016	0.994	0.941	1.98231e-126	Hem1	LOC119590397
1.62137e-130	0.470298	0.909	0.756	2.49416e-126	Hem1	LOC119583353
2.9141e-127	0.287048	0.167	0.041	4.48277e-123	Hem1	LOC119590786
3.64351e-126	0.450542	0.931	0.79	5.60481e-122	Hem1	LOC119579306
5.05526e-126	0.316672	0.995	0.954	7.77651e-122	Hem1	LOC119593096
5.60717e-126	0.378007	0.895	0.73	8.62551e-122	Hem1	LOC119590669
1.01155e-125	0.52435	0.603	0.382	1.55607e-121	Hem1	LOC119594044
1.12781e-125	0.290464	0.988	0.936	1.73492e-121	Hem1	LOC119576960
3.4093e-125	0.40149	0.907	0.745	5.24452e-121	Hem1	LOC119586956
6.668e-125	0.369068	0.919	0.762	1.02574e-120	Hem1	LOC119595034
8.4904e-125	0.64879	0.674	0.467	1.30608e-120	Hem1	LOC119582824
2.33381e-124	0.433268	0.325	0.15	3.59011e-120	Hem1	LOC119573130
1.00053e-123	0.367416	0.675	0.45	1.53911e-119	Hem1	LOC119599367
3.75897e-122	0.352347	0.332	0.146	5.78243e-118	Hem1	LOC119572325
3.77758e-122	0.352797	0.505	0.293	5.81105e-118	Hem1	LOC119574144
5.09735e-122	0.392946	0.468	0.255	7.84126e-118	Hem1	LOC119582673
2.91113e-121	0.408537	0.818	0.613	4.4782e-117	Hem1	LOC119595879
5.47097e-119	0.296944	0.209	0.069	8.41599e-115	Hem1	LOC119577694
3.39476e-118	0.303424	0.958	0.866	5.22216e-114	Hem1	LOC119588569
1.57678e-117	0.369585	0.612	0.384	2.42556e-113	Hem1	LOC119579206
2.34997e-117	0.368604	0.315	0.142	3.61496e-113	Hem1	LOC119576346
7.02386e-117	0.346302	0.81	0.6	1.08048e-112	Hem1	LOC119590177
4.7707e-115	0.368584	0.68	0.464	7.33877e-111	Hem1	LOC119582025
1.43145e-114	0.302733	0.993	0.948	2.202e-110	Hem1	LOC119578142
1.47634e-114	0.314957	0.293	0.125	2.27105e-110	Hem1	LOC119594760
1.66331e-114	0.346061	0.518	0.3	2.55867e-110	Hem1	LOC119574968
3.23314e-114	0.322433	0.69	0.473	4.97355e-110	Hem1	LOC119581053
7.26605e-114	1.71219	0.121	0.022	1.11774e-109	Hem1	LOC119575834
1.29744e-113	0.43121	0.917	0.802	1.99586e-109	Hem1	LOC119598268
2.71046e-113	0.548001	0.166	0.048	4.16949e-109	Hem1	LOC119580336
3.30462e-113	0.358538	0.441	0.235	5.0835e-109	Hem1	LOC119593775
3.39229e-113	0.346984	0.622	0.402	5.21836e-109	Hem1	LOC119595766
6.34912e-113	0.355232	0.698	0.476	9.76686e-109	Hem1	LOC119582537
1.34753e-112	0.353221	0.983	0.903	2.07291e-108	Hem1	LOC119592537
3.26828e-111	0.361296	0.711	0.485	5.02759e-107	Hem1	LOC119579026
2.83412e-110	0.353552	0.748	0.517	4.35972e-106	Hem1	LOC119599365
2.96665e-110	0.280502	0.196	0.064	4.5636e-106	Hem1	LOC119575222
6.8294e-110	0.409137	0.373	0.192	1.05057e-105	Hem1	LOC119595079
7.53344e-110	0.341355	0.7	0.472	1.15887e-105	Hem1	LOC119572247
2.98836e-109	0.32688	0.717	0.492	4.597e-105	Hem1	LOC119582004
3.98282e-109	0.306506	0.995	0.952	6.12677e-105	Hem1	LOC119579427
4.00904e-109	0.314172	0.995	0.942	6.16711e-105	Hem1	LOC119594752
7.11723e-109	0.322681	0.685	0.465	1.09484e-104	Hem1	LOC119591904
8.23806e-109	0.346221	0.829	0.633	1.26726e-104	Hem1	LOC119588665
1.40741e-108	0.682747	0.961	0.897	2.16502e-104	Hem1	LOC119582825
3.63026e-108	0.374001	0.572	0.359	5.58443e-104	Hem1	LOC119587746
3.72984e-108	0.336722	0.401	0.212	5.73761e-104	Hem1	LOC119586933
4.2222e-107	0.312803	0.532	0.322	6.49501e-103	Hem1	LOC119568773
4.55869e-107	0.312224	0.906	0.746	7.01263e-103	Hem1	LOC119590106
5.61583e-107	0.314319	0.782	0.572	8.63884e-103	Hem1	LOC119589070
8.09022e-107	0.306808	0.995	0.956	1.24452e-102	Hem1	LOC119593141
9.35058e-107	0.377148	0.791	0.569	1.4384e-102	Hem1	LOC119577108
2.28629e-106	0.443512	0.583	0.373	3.517e-102	Hem1	LOC119594247
3.63074e-106	0.287257	0.807	0.591	5.58517e-102	Hem1	LOC119590721
5.11846e-106	0.297139	0.995	0.967	7.87372e-102	Hem1	LOC119583482
6.07353e-106	0.305075	0.279	0.126	9.34291e-102	Hem1	LOC119587174
6.46515e-105	0.353379	0.366	0.19	9.94535e-101	Hem1	LOC119593068
1.20334e-104	0.281278	0.989	0.911	1.8511e-100	Hem1	LOC119582536
2.56082e-104	0.341496	0.493	0.297	3.93932e-100	Hem1	LOC119599466
3.07471e-104	0.319722	0.891	0.735	4.72983e-100	Hem1	LOC119576212
1.14889e-103	0.336301	0.854	0.672	1.76733e-99	Hem1	LOC119580851
4.74746e-103	0.331963	0.852	0.672	7.30302e-99	Hem1	LOC119575371
1.3039e-102	0.298194	0.289	0.133	2.0058e-98	Hem1	LOC119574574
2.41578e-102	0.368165	0.582	0.367	3.71619e-98	Hem1	LOC119585797
1.28909e-101	0.358131	0.838	0.649	1.98301e-97	Hem1	LOC119576073
1.59678e-101	0.546723	0.14	0.037	2.45633e-97	Hem1	LOC119581264
4.11941e-101	0.320996	0.407	0.22	6.33688e-97	Hem1	LOC119591351
9.19503e-101	0.275649	0.273	0.119	1.41447e-96	Hem1	LOC119583902
1.18594e-100	0.34479	0.758	0.551	1.82433e-96	Hem1	LOC119578071
1.88725e-100	0.352733	0.466	0.272	2.90316e-96	Hem1	LOC119576202
2.43342e-100	0.333655	0.643	0.436	3.74333e-96	Hem1	LOC119582868
2.94655e-100	0.325352	0.317	0.154	4.53267e-96	Hem1	LOC119576379
4.02595e-100	0.288024	0.498	0.293	6.19311e-96	Hem1	LOC119592143
4.03582e-100	0.281081	0.943	0.808	6.2083e-96	Hem1	LOC119584989
1.68691e-99	0.287296	0.739	0.531	2.59497e-95	Hem1	LOC119580875
2.38675e-99	0.507163	0.518	0.329	3.67154e-95	Hem1	LOC119583057
1.21107e-98	0.317203	0.565	0.36	1.86299e-94	Hem1	LOC119569712
2.0892e-97	0.297044	0.733	0.521	3.21382e-93	Hem1	LOC119593115
5.83246e-97	0.317633	0.589	0.39	8.97208e-93	Hem1	LOC119584999
1.91711e-96	0.257313	0.856	0.671	2.94909e-92	Hem1	LOC119578897
9.83947e-96	0.278416	0.826	0.652	1.51361e-91	Hem1	LOC119577139
2.77328e-95	0.261002	0.401	0.217	4.26613e-91	Hem1	LOC119590703
6.69281e-95	0.282406	0.498	0.304	1.02955e-90	Hem1	LOC119587094
8.44721e-95	0.305498	0.913	0.759	1.29943e-90	Hem1	LOC119577273
1.03121e-94	0.271693	0.923	0.72	1.58631e-90	Hem1	LOC119586321
1.26025e-94	0.419748	0.878	0.716	1.93864e-90	Hem1	LOC119594120
4.54374e-94	0.368706	0.619	0.42	6.98963e-90	Hem1	LOC119585693
1.7307e-93	0.585713	0.984	0.907	2.66233e-89	Hem1	LOC119590026
2.90337e-93	0.638841	0.148	0.045	4.46625e-89	Hem1	LOC119572481
7.88017e-93	0.308392	0.995	0.922	1.21221e-88	Hem1	LOC119586466
9.18327e-93	0.302132	0.395	0.218	1.41266e-88	Hem1	LOC119587993
6.61986e-92	0.476849	0.521	0.339	1.01833e-87	Hem1	LOC119594249
2.68457e-91	0.282298	0.718	0.515	4.12967e-87	Hem1	LOC119592762
2.74023e-91	0.270491	0.992	0.917	4.2153e-87	Hem1	LOC119579286
4.36328e-91	0.293016	0.987	0.888	6.71203e-87	Hem1	LOC119594004
1.53093e-90	0.275723	0.992	0.932	2.35503e-86	Hem1	LOC119575119
1.83193e-90	0.292245	0.826	0.638	2.81806e-86	Hem1	LOC119585020
2.15235e-90	0.250202	0.254	0.113	3.31096e-86	Hem1	LOC119597610
3.02685e-90	0.272036	0.997	0.97	4.65621e-86	Hem1	LOC119580534
5.8187e-90	0.261102	0.419	0.247	8.95091e-86	Hem1	LOC119598198
1.11156e-89	1.06782	0.105	0.023	1.70991e-85	Hem1	LOC119576432
1.4878e-89	0.306002	0.595	0.399	2.28868e-85	Hem1	LOC119574201
1.54233e-89	0.256789	0.581	0.366	2.37256e-85	Hem1	LOC119583665
2.07169e-89	0.26934	0.996	0.945	3.18688e-85	Hem1	LOC119581940
2.70692e-89	0.298526	0.989	0.91	4.16406e-85	Hem1	LOC119595809
7.15462e-89	0.27905	0.993	0.944	1.1006e-84	Hem1	LOC119577758
7.2223e-89	0.319351	0.694	0.502	1.11101e-84	Hem1	LOC119572977
9.39447e-89	0.297023	0.457	0.271	1.44515e-84	Hem1	LOC119572740
1.79226e-88	0.354579	0.483	0.301	2.75703e-84	Hem1	LOC119597805
3.95059e-88	0.262626	0.558	0.36	6.07719e-84	Hem1	LOC119585833
8.0661e-88	0.261129	0.825	0.642	1.24081e-83	Hem1	LOC119570429
1.38086e-87	0.299759	0.402	0.226	2.12418e-83	Hem1	LOC119571533
3.22405e-87	0.301726	0.668	0.465	4.95955e-83	Hem1	LOC119576445
4.42351e-87	0.289108	0.676	0.476	6.80469e-83	Hem1	LOC119575370
8.03065e-87	0.265851	0.535	0.344	1.23536e-82	Hem1	LOC119574420
9.73288e-87	0.280706	0.995	0.961	1.49721e-82	Hem1	LOC119584424
1.15623e-86	0.290552	0.439	0.261	1.77863e-82	Hem1	LOC119578978
2.46605e-86	0.332169	0.294	0.148	3.79352e-82	Hem1	LOC119583813
1.11099e-85	0.299421	0.35	0.19	1.70904e-81	Hem1	LOC119586805
1.95586e-85	0.32139	0.533	0.342	3.00869e-81	Hem1	LOC119594274
2.34656e-85	0.344819	0.106	0.024	3.60971e-81	Hem1	LOC119581045
4.2492e-85	0.261887	0.492	0.305	6.53655e-81	Hem1	LOC119598551
4.80628e-85	0.293348	0.616	0.414	7.3935e-81	Hem1	LOC119572665
6.33374e-85	0.266978	0.995	0.953	9.74319e-81	Hem1	LOC119592515
6.4364e-85	0.318274	0.359	0.198	9.90112e-81	Hem1	LOC119598581
1.19942e-84	0.349576	0.563	0.382	1.84506e-80	Hem1	LOC119581155
1.2173e-84	0.272255	0.416	0.244	1.87258e-80	Hem1	LOC119578843
2.34737e-84	0.271436	0.745	0.545	3.61096e-80	Hem1	LOC119589936
5.42625e-84	0.275183	0.505	0.314	8.34721e-80	Hem1	LOC119594660
9.82704e-84	0.298125	0.278	0.137	1.51169e-79	Hem1	LOC119574581
2.92481e-83	0.256485	0.942	0.83	4.49924e-79	Hem1	LOC119569698
3.28959e-83	0.298064	0.178	0.068	5.06038e-79	Hem1	LOC119595447
4.99284e-83	0.267005	0.309	0.157	7.68048e-79	Hem1	LOC119584352
5.81055e-83	0.274631	0.443	0.268	8.93837e-79	Hem1	LOC119580934
2.71389e-82	0.278579	0.274	0.132	4.17478e-78	Hem1	LOC119577263
3.01922e-82	0.25696	0.989	0.931	4.64446e-78	Hem1	LOC119599288
6.78395e-82	0.492288	0.67	0.49	1.04357e-77	Hem1	LOC119581965
8.2922e-82	0.252199	0.822	0.627	1.27559e-77	Hem1	LOC119591587
8.92137e-82	0.321213	0.885	0.737	1.37238e-77	Hem1	LOC119584207
1.66466e-81	0.298089	0.783	0.587	2.56075e-77	Hem1	LOC119589916
2.40791e-81	0.267557	0.996	0.962	3.70408e-77	Hem1	LOC119579032
8.79996e-81	0.27399	0.361	0.2	1.3537e-76	Hem1	LOC119576291
1.02799e-80	0.267506	0.997	0.962	1.58136e-76	Hem1	LOC119599316
1.35439e-80	0.251708	0.992	0.951	2.08346e-76	Hem1	LOC119585017
2.01857e-80	0.255372	0.96	0.836	3.10517e-76	Hem1	LOC119578743
2.03244e-80	0.274366	0.832	0.661	3.12651e-76	Hem1	LOC119574655
5.53745e-80	0.276991	0.778	0.594	8.51826e-76	Hem1	LOC119580411
9.5975e-80	0.266328	0.997	0.955	1.47638e-75	Hem1	LOC119577692
9.67839e-80	0.280642	0.441	0.267	1.48883e-75	Hem1	LOC119587128
1.21652e-79	0.262467	0.881	0.723	1.87137e-75	Hem1	LOC119585236
6.2797e-79	0.257828	0.512	0.328	9.66007e-75	Hem1	LOC119576954
8.16274e-79	0.26318	0.876	0.71	1.25567e-74	Hem1	LOC119592070
9.3149e-79	0.322928	0.648	0.483	1.43291e-74	Hem1	LOC119579036
9.45495e-79	0.25192	0.596	0.395	1.45445e-74	Hem1	LOC119599457
1.65064e-78	0.282906	0.539	0.357	2.53918e-74	Hem1	LOC119596164
4.39456e-78	0.250023	0.995	0.958	6.76015e-74	Hem1	LOC119587191
5.66306e-78	0.267998	0.996	0.96	8.71149e-74	Hem1	LOC119582540
1.08884e-77	0.289514	0.52	0.335	1.67497e-73	Hem1	LOC119595622
2.0983e-77	0.257107	0.543	0.357	3.22782e-73	Hem1	LOC119594368
2.58706e-77	0.251997	0.288	0.148	3.97967e-73	Hem1	LOC119591914
3.44209e-77	0.270747	0.592	0.398	5.29497e-73	Hem1	LOC119582508
1.0715e-76	0.283145	0.986	0.929	1.64829e-72	Hem1	LOC119577270
9.87057e-76	0.272359	0.571	0.379	1.51839e-71	Hem1	LOC119598218
1.17554e-75	0.252697	0.258	0.128	1.80834e-71	Hem1	LOC119591291
3.609e-75	0.273106	0.718	0.521	5.55173e-71	Hem1	LOC119580310
4.23816e-75	0.257345	0.398	0.236	6.51956e-71	Hem1	LOC119578504
1.31894e-74	0.415588	0.185	0.077	2.02893e-70	Hem1	LOC119582848
1.63152e-74	0.701397	0.104	0.027	2.50976e-70	Hem1	LOC119594953
2.14728e-73	0.261681	0.993	0.938	3.30316e-69	Hem1	LOC119575302
2.17904e-73	0.27696	0.908	0.773	3.35201e-69	Hem1	LOC119580092
3.8911e-73	0.269822	0.69	0.51	5.98569e-69	Hem1	LOC119594747
1.85638e-71	0.264205	0.229	0.109	2.85567e-67	Hem1	LOC119575026
4.26293e-71	0.662829	0.211	0.098	6.55766e-67	Hem1	LOC119569495
6.3044e-71	0.586287	0.256	0.132	9.69805e-67	Hem1	LOC119595080
1.83883e-69	0.265845	0.475	0.308	2.82868e-65	Hem1	LOC119576243
1.47519e-68	0.346103	0.924	0.821	2.26929e-64	Hem1	LOC119593982
2.42215e-68	0.255455	0.996	0.939	3.72599e-64	Hem1	LOC119577756
5.78955e-68	0.270524	0.128	0.045	8.90606e-64	Hem1	LOC119570475
1.9163e-67	0.250982	0.992	0.908	2.94784e-63	Hem1	LOC119581876
5.07478e-67	0.299358	0.165	0.068	7.80654e-63	Hem1	LOC119586462
7.45487e-67	0.282375	0.494	0.327	1.14678e-62	Hem1	LOC119577862
1.44967e-59	0.515647	0.156	0.067	2.23003e-55	Hem1	LOC119569522
1.1132e-58	0.280167	0.998	0.971	1.71244e-54	Hem1	LOC119585904
1.26351e-57	0.25993	0.534	0.371	1.94366e-53	Hem1	LOC119597350
4.56165e-53	0.273198	0.406	0.267	7.01718e-49	Hem1	LOC119568168
1.34731e-50	0.370731	0.333	0.21	2.07256e-46	Hem1	LOC119582772
6.99586e-50	0.33236	0.458	0.322	1.07617e-45	Hem1	LOC119582904
2.43871e-44	0.336898	0.924	0.927	3.75146e-40	Hem1	LOC119598297
3.22129e-43	0.280759	0.106	0.043	4.95531e-39	Hem1	LOC119582769
7.18273e-41	0.267781	0.92	0.862	1.10492e-36	Hem1	LOC119576143
2.56006e-40	0.289646	0.155	0.08	3.93814e-36	Hem1	LOC119589921
1.09727e-38	0.657461	0.301	0.202	1.68794e-34	Hem1	LOC119585669
3.2595e-37	0.456485	0.137	0.07	5.01409e-33	Hem1	LOC119585822
7.53079e-36	0.354854	0.696	0.558	1.15846e-31	Hem1	LOC119596927
2.25954e-34	0.279038	0.151	0.081	3.47585e-30	Hem1	LOC119582847
1.26165e-23	0.259275	0.103	0.055	1.94079e-19	Hem1	LOC119599023
7.1681e-19	0.476322	0.557	0.493	1.10267e-14	Hem1	LOC119576449
7.61616e-19	0.457412	0.454	0.393	1.17159e-14	Hem1	LOC119580360
0	2.33219	0.971	0.437	0	Hem2	LOC119574273
0	2.2388	0.749	0.28	0	Hem2	LOC119594420
0	2.04901	0.945	0.608	0	Hem2	LOC119582601
0	1.88561	0.91	0.459	0	Hem2	LOC119588517
0	1.86311	0.692	0.209	0	Hem2	LOC119594096
0	1.7776	0.804	0.461	0	Hem2	LOC119582616
0	1.60824	0.67	0.306	0	Hem2	LOC119598298
0	1.57809	0.628	0.268	0	Hem2	LOC119580572
0	1.57152	0.691	0.274	0	Hem2	LOC119581080
0	1.54665	0.617	0.287	0	Hem2	LOC119589901
0	1.51532	0.622	0.29	0	Hem2	LOC119594295
0	1.50287	0.501	0.148	0	Hem2	LOC119594418
0	1.49136	0.652	0.329	0	Hem2	LOC119574565
0	1.47414	0.549	0.205	0	Hem2	LOC119599022
0	1.43108	0.889	0.615	0	Hem2	LOC119588832
0	1.36714	0.681	0.333	0	Hem2	LOC119572588
0	1.35793	0.653	0.351	0	Hem2	LOC119596952
0	1.3237	0.741	0.465	0	Hem2	LOC119596310
0	1.22664	0.999	0.905	0	Hem2	LOC119595388
0	1.17015	0.992	0.886	0	Hem2	LOC119590024
0	1.16719	0.931	0.763	0	Hem2	LOC119576101
0	1.13699	0.843	0.611	0	Hem2	LOC119580278
0	1.121	0.835	0.619	0	Hem2	LOC119586415
0	1.10655	0.977	0.883	0	Hem2	LOC119572401
0	1.09798	0.987	0.943	0	Hem2	LOC119585231
0	1.05961	0.914	0.768	0	Hem2	LOC119596131
0	1.04384	0.906	0.708	0	Hem2	LOC119574467
0	1.02104	0.999	0.933	0	Hem2	LOC119576797
0	0.997776	0.991	0.913	0	Hem2	LOC119577804
0	0.997488	0.938	0.754	0	Hem2	LOC119586321
0	0.99447	0.951	0.827	0	Hem2	LOC119599330
0	0.97533	0.992	0.898	0	Hem2	LOC119576185
0	0.947273	0.992	0.941	0	Hem2	LOC119598975
0	0.9132	0.984	0.909	0	Hem2	LOC119593367
0	0.909253	0.998	0.94	0	Hem2	LOC119578928
0	0.908333	0.993	0.943	0	Hem2	LOC119579295
0	0.889937	0.999	0.945	0	Hem2	LOC119580295
0	0.888828	0.949	0.847	0	Hem2	LOC119572838
0	0.885834	0.997	0.956	0	Hem2	LOC119579403
0	0.881651	0.998	0.957	0	Hem2	LOC119585875
0	0.825655	0.92	0.84	0	Hem2	LOC119581868
0	0.806847	0.999	0.952	0	Hem2	LOC119596456
0	0.806529	0.998	0.946	0	Hem2	LOC119591379
0	0.805441	0.999	0.958	0	Hem2	LOC119585877
0	0.797845	0.999	0.949	0	Hem2	LOC119577756
0	0.795739	0.941	0.848	0	Hem2	LOC119582609
0	0.793567	0.987	0.914	0	Hem2	LOC119574114
0	0.793192	0.996	0.943	0	Hem2	LOC119582520
0	0.792801	0.998	0.947	0	Hem2	LOC119585734
0	0.787715	0.997	0.947	0	Hem2	LOC119575302
0	0.784951	0.999	0.967	0	Hem2	LOC119591393
0	0.779514	0.999	0.966	0	Hem2	LOC119595880
0	0.775459	0.998	0.953	0	Hem2	LOC119590715
0	0.772729	1	0.967	0	Hem2	LOC119579032
0	0.772612	0.999	0.922	0	Hem2	LOC119581876
0	0.769812	0.998	0.956	0	Hem2	LOC119594364
0	0.762325	0.996	0.904	0	Hem2	LOC119594004
0	0.759405	0.993	0.943	0	Hem2	LOC119575427
0	0.75871	1	0.961	0	Hem2	LOC119593096
0	0.755128	1	0.968	0	Hem2	LOC119599316
0	0.753221	1	0.96	0	Hem2	LOC119592515
0	0.739952	0.995	0.941	0	Hem2	LOC119599288
0	0.734839	0.999	0.952	0	Hem2	LOC119577758
0	0.73418	1	0.978	0	Hem2	LOC119577802
0	0.733626	0.997	0.981	0	Hem2	LOC119584410
0	0.732248	0.998	0.936	0	Hem2	LOC119586466
0	0.727822	0.998	0.963	0	Hem2	LOC119589836
0	0.724634	0.999	0.964	0	Hem2	LOC119587191
0	0.72315	0.999	0.969	0	Hem2	LOC119592037
0	0.721153	0.998	0.963	0	Hem2	LOC119593141
0	0.716819	1	0.951	0	Hem2	LOC119594752
0	0.716093	0.999	0.971	0	Hem2	LOC119583482
0	0.714658	0.998	0.959	0	Hem2	LOC119581758
0	0.710443	0.992	0.931	0	Hem2	LOC119579286
0	0.705968	0.999	0.962	0	Hem2	LOC119577692
0	0.705136	0.997	0.958	0	Hem2	LOC119585017
0	0.69938	0.999	0.967	0	Hem2	LOC119584424
0	0.685691	0.997	0.96	0	Hem2	LOC119579427
0	0.681979	0.996	0.942	0	Hem2	LOC119575119
0	0.681648	0.992	0.925	0	Hem2	LOC119580878
0	0.678745	0.992	0.925	0	Hem2	LOC119582536
0	0.675501	0.999	0.966	0	Hem2	LOC119582540
0	0.669835	0.997	0.922	0	Hem2	LOC119595809
0	0.667012	1	0.974	0	Hem2	LOC119580534
0	0.664644	0.99	0.933	0	Hem2	LOC119582866
0	0.659697	0.999	0.963	0	Hem2	LOC119575018
0	0.642449	0.996	0.94	0	Hem2	LOC119594677
0	0.63912	0.997	0.954	0	Hem2	LOC119581940
0	0.633065	1	0.97	0	Hem2	LOC119592465
0	0.632372	0.999	0.949	0	Hem2	LOC119581133
0	0.625221	0.995	0.951	0	Hem2	LOC119590397
0	0.624849	0.998	0.955	0	Hem2	LOC119578142
0	0.619558	1	0.969	0	Hem2	LOC119590974
0	0.595462	0.998	0.988	0	Hem2	LOC119594551
5.27554e-305	1.23068	0.604	0.304	8.11537e-301	Hem2	LOC119591959
3.14841e-300	1.13348	0.416	0.136	4.84319e-296	Hem2	LOC119596470
2.06083e-297	0.596186	0.995	0.957	3.17018e-293	Hem2	LOC119597604
3.92374e-295	0.825137	0.902	0.785	6.03589e-291	Hem2	LOC119595117
2.87227e-293	0.640329	0.996	0.929	4.41841e-289	Hem2	LOC119586393
4.83957e-293	1.1677	0.489	0.198	7.44471e-289	Hem2	LOC119581897
1.85296e-292	0.62493	0.987	0.961	2.85041e-288	Hem2	LOC119592697
3.39804e-288	0.636041	0.998	0.934	5.22721e-284	Hem2	LOC119590070
3.78659e-285	1.28323	0.438	0.157	5.82491e-281	Hem2	LOC119582288
1.23355e-283	0.988137	0.858	0.667	1.89757e-279	Hem2	LOC119576123
1.52631e-283	1.02732	0.447	0.165	2.34792e-279	Hem2	LOC119581073
7.81471e-281	1.25064	0.816	0.536	1.20214e-276	Hem2	LOC119598656
2.60222e-270	0.883633	0.939	0.877	4.00299e-266	Hem2	LOC119587149
4.96825e-267	1.14871	0.48	0.203	7.64266e-263	Hem2	LOC119581180
4.39462e-266	0.79804	0.91	0.815	6.76024e-262	Hem2	LOC119594084
1.67813e-265	0.881217	0.874	0.737	2.58147e-261	Hem2	LOC119593409
1.4019e-264	1.09099	0.37	0.115	2.15654e-260	Hem2	LOC119577954
1.88098e-261	0.585063	0.993	0.94	2.89351e-257	Hem2	LOC119585865
2.72523e-260	1.06116	0.721	0.481	4.19222e-256	Hem2	LOC119583672
5.29733e-258	0.581161	0.995	0.936	8.14889e-254	Hem2	LOC119577044
1.60199e-257	0.649266	0.989	0.916	2.46434e-253	Hem2	LOC119592537
1.73668e-257	0.616991	0.99	0.919	2.67154e-253	Hem2	LOC119580903
3.10657e-254	0.893696	0.756	0.553	4.77884e-250	Hem2	LOC119568212
1.01984e-251	0.898426	0.843	0.708	1.56882e-247	Hem2	LOC119573053
1.94609e-248	1.12254	0.412	0.158	2.99368e-244	Hem2	LOC119569274
4.13003e-247	0.810144	0.867	0.708	6.35323e-243	Hem2	LOC119592136
5.56765e-246	0.646037	0.972	0.867	8.56471e-242	Hem2	LOC119586385
1.61281e-242	0.788106	0.936	0.882	2.48098e-238	Hem2	LOC119599055
6.12672e-239	1.21743	0.59	0.334	9.42473e-235	Hem2	LOC119594601
1.02334e-238	0.618198	0.95	0.925	1.5742e-234	Hem2	LOC119583675
3.56422e-238	0.929064	0.749	0.539	5.48285e-234	Hem2	LOC119596951
4.34328e-237	0.861612	0.778	0.583	6.68127e-233	Hem2	LOC119595613
8.91195e-236	0.856398	0.78	0.593	1.37092e-231	Hem2	LOC119584457
5.75778e-235	0.537273	0.995	0.937	8.85719e-231	Hem2	LOC119580879
2.06936e-232	1.07773	0.406	0.158	3.1833e-228	Hem2	LOC119580063
3.61052e-232	0.665738	0.915	0.837	5.55407e-228	Hem2	LOC119591350
6.5691e-231	1.00343	0.865	0.764	1.01053e-226	Hem2	LOC119590164
6.29437e-230	0.939613	0.53	0.278	9.68262e-226	Hem2	LOC119580088
4.68093e-224	1.02244	0.391	0.153	7.20067e-220	Hem2	LOC119578881
4.04624e-223	0.832362	0.85	0.73	6.22433e-219	Hem2	LOC119592620
2.54195e-221	0.567561	0.991	0.934	3.91028e-217	Hem2	LOC119582501
4.97346e-218	0.412816	1	0.991	7.65068e-214	Hem2	LOC119595505
1.45118e-217	0.806327	0.731	0.519	2.23235e-213	Hem2	LOC119589188
4.72093e-217	0.540375	0.994	0.989	7.26221e-213	Hem2	LOC119595078
5.1157e-217	0.957565	0.72	0.553	7.86949e-213	Hem2	LOC119586353
6.33031e-216	0.812171	0.836	0.724	9.73791e-212	Hem2	LOC119583105
7.63066e-216	0.971707	0.398	0.16	1.17382e-211	Hem2	LOC119581040
7.78497e-214	0.857283	0.293	0.085	1.19756e-209	Hem2	LOC119576296
5.24536e-213	0.568164	0.965	0.907	8.06894e-209	Hem2	LOC119579291
6.28573e-213	0.920992	0.338	0.115	9.66934e-209	Hem2	LOC119590627
1.5185e-211	0.966026	0.776	0.626	2.3359e-207	Hem2	LOC119589948
3.82895e-211	0.974812	0.451	0.206	5.89007e-207	Hem2	LOC119591902
8.06534e-209	1.07458	0.455	0.216	1.24069e-204	Hem2	LOC119581607
4.04394e-208	0.980091	0.386	0.153	6.2208e-204	Hem2	LOC119592574
5.56632e-207	0.985623	0.37	0.14	8.56267e-203	Hem2	LOC119582845
2.21453e-205	1.03834	0.464	0.226	3.40661e-201	Hem2	LOC119574673
4.29185e-205	0.521617	0.991	0.973	6.60216e-201	Hem2	LOC119577790
1.28896e-204	1.00266	0.411	0.177	1.98281e-200	Hem2	LOC119581749
1.50398e-204	1.0579	0.535	0.304	2.31357e-200	Hem2	LOC119573123
5.61428e-203	0.424371	0.998	0.992	8.63644e-199	Hem2	LOC119575502
8.62853e-203	0.985174	0.369	0.143	1.32733e-198	Hem2	LOC119578757
2.41637e-202	0.866373	0.751	0.584	3.71711e-198	Hem2	LOC119593993
8.14342e-199	0.863566	0.682	0.486	1.2527e-194	Hem2	LOC119579504
6.36181e-197	0.938622	0.643	0.447	9.78638e-193	Hem2	LOC119580220
9.81588e-195	0.748481	0.811	0.712	1.50998e-190	Hem2	LOC119573368
2.62169e-194	0.768288	0.812	0.689	4.03295e-190	Hem2	LOC119577916
1.49997e-193	0.677969	0.863	0.761	2.30741e-189	Hem2	LOC119576092
3.78434e-193	0.764448	0.845	0.733	5.82145e-189	Hem2	LOC119586949
2.25592e-191	0.794666	0.312	0.102	3.47028e-187	Hem2	LOC119596024
6.96919e-190	0.705339	0.812	0.667	1.07207e-185	Hem2	LOC119591587
9.90629e-189	0.466824	0.995	0.959	1.52388e-184	Hem2	LOC119592750
2.51053e-186	0.994941	0.389	0.167	3.86195e-182	Hem2	LOC119593829
3.67951e-186	0.899428	0.353	0.14	5.6602e-182	Hem2	LOC119585430
2.07758e-185	1.06146	0.447	0.225	3.19595e-181	Hem2	LOC119577210
2.73697e-185	0.864775	0.673	0.492	4.21028e-181	Hem2	LOC119587966
3.66967e-184	0.995858	0.467	0.243	5.64505e-180	Hem2	LOC119589416
4.38889e-184	0.575411	0.942	0.865	6.75143e-180	Hem2	LOC119578743
5.01273e-184	0.783311	0.245	0.066	7.71108e-180	Hem2	LOC119580316
1.89709e-182	0.798827	0.374	0.158	2.91829e-178	Hem2	LOC119568240
2.37182e-181	1.13887	0.43	0.207	3.64857e-177	Hem2	LOC119581760
2.70973e-181	0.893262	0.476	0.254	4.16837e-177	Hem2	LOC119581903
3.53077e-181	0.644499	0.863	0.769	5.43139e-177	Hem2	LOC119597733
4.91971e-181	0.878094	0.356	0.145	7.568e-177	Hem2	LOC119589205
7.07831e-180	0.950673	0.354	0.146	1.08886e-175	Hem2	LOC119591485
2.82403e-178	0.762554	0.676	0.492	4.3442e-174	Hem2	LOC119580694
7.0238e-178	0.69469	0.978	0.952	1.08047e-173	Hem2	LOC119569768
1.70881e-176	0.848675	0.894	0.813	2.62866e-172	Hem2	LOC119579322
5.84072e-176	0.607155	0.897	0.795	8.98477e-172	Hem2	LOC119576137
1.08532e-174	0.824178	0.63	0.446	1.66955e-170	Hem2	LOC119568187
4.62004e-174	0.742725	0.773	0.64	7.10701e-170	Hem2	LOC119581039
1.75042e-173	0.56828	0.955	0.917	2.69267e-169	Hem2	LOC119595732
2.39049e-172	0.676773	0.812	0.706	3.6773e-168	Hem2	LOC119575120
3.16594e-171	0.895652	0.609	0.403	4.87016e-167	Hem2	LOC119584743
1.99783e-170	0.540026	0.95	0.88	3.07326e-166	Hem2	LOC119578204
2.63039e-170	0.816867	0.413	0.193	4.04633e-166	Hem2	LOC119593490
5.08588e-170	0.795874	0.499	0.292	7.82361e-166	Hem2	LOC119594689
6.06062e-168	1.01573	0.438	0.226	9.32306e-164	Hem2	LOC119590859
2.48911e-167	0.788879	0.632	0.442	3.82899e-163	Hem2	LOC119588684
2.63715e-167	0.55182	0.919	0.841	4.05673e-163	Hem2	LOC119582436
1.19188e-166	0.410952	1	0.992	1.83347e-162	Hem2	LOC119589496
1.19263e-166	0.790806	0.69	0.537	1.83463e-162	Hem2	LOC119596950
1.92893e-166	0.924355	0.318	0.123	2.96727e-162	Hem2	LOC119595456
6.4628e-166	0.777675	0.649	0.476	9.94173e-162	Hem2	LOC119573122
1.75504e-164	0.771329	0.422	0.198	2.69977e-160	Hem2	LOC119572288
5.63745e-164	0.829632	0.305	0.115	8.67208e-160	Hem2	LOC119585581
8.74187e-164	0.806615	0.459	0.248	1.34476e-159	Hem2	LOC119582608
9.79318e-164	0.890743	0.485	0.283	1.50648e-159	Hem2	LOC119576208
2.19417e-163	0.904612	0.418	0.21	3.3753e-159	Hem2	LOC119577854
1.68354e-162	0.633522	0.86	0.773	2.58979e-158	Hem2	LOC119588696
4.29788e-162	0.647319	0.831	0.731	6.61144e-158	Hem2	LOC119584570
9.93138e-162	0.826206	0.591	0.404	1.52774e-157	Hem2	LOC119575078
1.3496e-159	0.772766	0.337	0.134	2.0761e-155	Hem2	LOC119596885
2.10284e-159	0.867018	0.332	0.137	3.2348e-155	Hem2	LOC119577209
9.43106e-159	0.470393	0.994	0.967	1.45078e-154	Hem2	LOC119573193
1.231e-158	0.837466	0.246	0.076	1.89365e-154	Hem2	LOC119597447
4.58587e-158	0.836959	0.355	0.158	7.05444e-154	Hem2	LOC119597808
2.08631e-157	0.642242	0.805	0.684	3.20937e-153	Hem2	LOC119581137
5.42113e-156	0.767658	0.274	0.097	8.33932e-152	Hem2	LOC119589259
1.43561e-155	0.774836	0.777	0.542	2.2084e-151	Hem2	LOC119580447
3.28476e-155	0.903711	0.391	0.191	5.05294e-151	Hem2	LOC119580905
6.95409e-154	0.707445	0.718	0.59	1.06975e-149	Hem2	LOC119596475
5.05568e-152	0.717915	0.371	0.165	7.77715e-148	Hem2	LOC119581016
7.51981e-152	0.734909	0.836	0.741	1.15677e-147	Hem2	LOC119599289
7.95435e-152	0.685448	0.812	0.736	1.22362e-147	Hem2	LOC119574974
8.13875e-152	0.764258	0.274	0.099	1.25198e-147	Hem2	LOC119586255
1.75712e-151	0.574638	0.924	0.746	2.70298e-147	Hem2	LOC119578139
2.05416e-151	0.880482	0.324	0.137	3.15991e-147	Hem2	LOC119575440
1.75689e-150	0.833438	0.317	0.132	2.70262e-146	Hem2	LOC119590742
8.87198e-150	0.822304	0.541	0.349	1.36478e-145	Hem2	LOC119593373
1.5113e-148	0.75532	0.327	0.141	2.32484e-144	Hem2	LOC119599121
1.67974e-148	1.06073	0.385	0.187	2.58394e-144	Hem2	LOC119569265
7.59771e-145	0.558452	0.879	0.799	1.16876e-140	Hem2	LOC119577273
8.7286e-145	0.768271	0.48	0.289	1.34272e-140	Hem2	LOC119582555
1.05967e-144	0.826546	0.517	0.325	1.6301e-140	Hem2	LOC119592064
1.93511e-144	0.701728	0.383	0.19	2.97678e-140	Hem2	LOC119577166
2.55948e-144	0.457329	0.979	0.92	3.93724e-140	Hem2	LOC119587043
8.40561e-144	0.722419	0.819	0.728	1.29303e-139	Hem2	LOC119592184
9.44812e-144	0.549271	0.875	0.77	1.4534e-139	Hem2	LOC119584363
1.38894e-143	0.57471	0.884	0.823	2.13661e-139	Hem2	LOC119598713
3.55748e-142	0.526151	0.937	0.933	5.47246e-138	Hem2	LOC119588723
1.51095e-141	0.709292	0.587	0.422	2.3243e-137	Hem2	LOC119585712
6.07132e-140	0.730079	0.612	0.448	9.33951e-136	Hem2	LOC119574376
1.32466e-139	0.579262	0.93	0.893	2.03772e-135	Hem2	LOC119595659
6.92509e-139	0.563826	0.844	0.752	1.06529e-134	Hem2	LOC119592070
5.78471e-138	0.817762	0.699	0.54	8.89861e-134	Hem2	LOC119596573
9.178e-137	0.600824	0.782	0.695	1.41185e-132	Hem2	LOC119588630
1.44764e-136	0.81261	0.483	0.301	2.2269e-132	Hem2	LOC119592222
2.16206e-135	0.740552	0.381	0.196	3.32589e-131	Hem2	LOC119597736
1.14088e-134	0.34828	0.994	0.985	1.75502e-130	Hem2	LOC119591918
1.15648e-134	0.618107	0.844	0.776	1.77902e-130	Hem2	LOC119578670
1.05811e-133	0.728129	0.686	0.56	1.6277e-129	Hem2	LOC119576118
1.79821e-132	0.495156	0.902	0.851	2.76618e-128	Hem2	LOC119597104
3.24246e-132	0.670592	0.216	0.069	4.98788e-128	Hem2	LOC119575046
9.01124e-132	0.771887	0.598	0.445	1.3862e-127	Hem2	LOC119594000
5.26571e-131	0.740746	0.7	0.584	8.10024e-127	Hem2	LOC119587854
1.73606e-130	0.531962	0.861	0.827	2.67058e-126	Hem2	LOC119568283
5.06449e-130	0.588338	0.802	0.71	7.79071e-126	Hem2	LOC119578692
4.1672e-129	0.707185	0.322	0.148	6.4104e-125	Hem2	LOC119588729
3.0446e-128	0.804121	0.531	0.355	4.68351e-124	Hem2	LOC119594391
4.13716e-128	0.728334	0.292	0.124	6.36419e-124	Hem2	LOC119585035
4.70042e-128	0.577643	0.812	0.726	7.23066e-124	Hem2	LOC119591313
6.52847e-128	0.616418	0.719	0.602	1.00427e-123	Hem2	LOC119596923
3.40479e-127	0.531475	0.854	0.792	5.23759e-123	Hem2	LOC119590106
8.5306e-127	0.625165	0.695	0.571	1.31226e-122	Hem2	LOC119598722
1.63444e-126	0.686519	0.42	0.24	2.51426e-122	Hem2	LOC119574440
2.25808e-124	0.718919	0.342	0.169	3.47361e-120	Hem2	LOC119593353
2.53288e-124	0.796854	0.608	0.458	3.89632e-120	Hem2	LOC119589145
3.42798e-124	0.727313	0.605	0.457	5.27326e-120	Hem2	LOC119577938
2.0352e-123	0.695093	0.553	0.389	3.13075e-119	Hem2	LOC119574387
1.26003e-122	0.683887	0.604	0.462	1.9383e-118	Hem2	LOC119583558
1.50402e-122	0.492944	0.881	0.796	2.31363e-118	Hem2	LOC119589824
2.43931e-121	0.689742	0.483	0.307	3.7524e-117	Hem2	LOC119593559
2.61895e-121	0.503938	0.846	0.774	4.02873e-117	Hem2	LOC119593663
2.26486e-120	0.677934	0.229	0.082	3.48403e-116	Hem2	LOC119587081
2.86888e-120	0.586117	0.751	0.648	4.41319e-116	Hem2	LOC119592585
6.30423e-120	0.663294	0.448	0.264	9.69779e-116	Hem2	LOC119599262
7.99131e-120	0.575982	0.211	0.07	1.2293e-115	Hem2	LOC119578808
9.90807e-120	0.622042	0.214	0.073	1.52416e-115	Hem2	LOC119585105
3.9033e-119	0.57993	0.185	0.055	6.00445e-115	Hem2	LOC119592079
9.53301e-119	0.63267	0.237	0.089	1.46646e-114	Hem2	LOC119597676
1.21478e-117	0.672402	0.236	0.089	1.86869e-113	Hem2	LOC119587168
1.89542e-117	0.838967	0.293	0.131	2.91572e-113	Hem2	LOC119584295
2.01781e-117	0.536239	0.776	0.702	3.104e-113	Hem2	LOC119598126
6.04807e-117	0.660784	0.261	0.107	9.30374e-113	Hem2	LOC119586320
7.52588e-117	0.48318	0.885	0.844	1.15771e-112	Hem2	LOC119593841
9.42513e-117	0.773949	0.355	0.179	1.44987e-112	Hem2	LOC119572301
4.32541e-116	0.702055	0.485	0.316	6.65378e-112	Hem2	LOC119596462
7.89282e-116	0.734037	0.615	0.477	1.21415e-111	Hem2	LOC119581195
1.52675e-115	0.615792	0.639	0.505	2.3486e-111	Hem2	LOC119575010
1.59396e-115	0.589237	0.672	0.537	2.452e-111	Hem2	LOC119582484
1.77837e-115	0.512245	0.84	0.75	2.73566e-111	Hem2	LOC119596326
1.96025e-115	0.502586	0.869	0.817	3.01546e-111	Hem2	LOC119594063
1.47453e-114	0.52306	0.857	0.788	2.26826e-110	Hem2	LOC119584804
2.18686e-114	0.616716	0.774	0.699	3.36405e-110	Hem2	LOC119573284
2.24963e-114	0.528523	0.161	0.043	3.4606e-110	Hem2	LOC119574973
5.00682e-114	0.693143	0.28	0.123	7.702e-110	Hem2	LOC119596821
2.71594e-113	0.619039	0.268	0.115	4.17793e-109	Hem2	LOC119579269
3.89359e-113	0.659812	0.62	0.477	5.9895e-109	Hem2	LOC119593946
7.02959e-113	0.646836	0.648	0.501	1.08136e-108	Hem2	LOC119597839
1.84117e-111	0.680906	0.363	0.197	2.83227e-107	Hem2	LOC119589867
2.18605e-110	0.772784	0.309	0.15	3.3628e-106	Hem2	LOC119580093
1.30825e-109	0.535398	0.183	0.057	2.01248e-105	Hem2	LOC119579582
2.12086e-109	0.409266	0.971	0.927	3.26252e-105	Hem2	LOC119581582
3.96297e-108	0.650182	0.463	0.301	6.09624e-104	Hem2	LOC119585677
8.14365e-108	0.535421	0.735	0.629	1.25274e-103	Hem2	LOC119582461
3.36863e-107	0.912595	0.609	0.452	5.18196e-103	Hem2	LOC119590711
3.43942e-107	0.655106	0.569	0.411	5.29086e-103	Hem2	LOC119583665
3.58662e-107	0.711595	0.505	0.35	5.5173e-103	Hem2	LOC119591191
9.61327e-106	0.638102	0.64	0.528	1.47881e-101	Hem2	LOC119571718
1.50241e-105	0.690571	0.261	0.114	2.31116e-101	Hem2	LOC119582575
2.08727e-105	0.595764	0.658	0.549	3.21085e-101	Hem2	LOC119575372
2.89027e-105	0.699267	0.326	0.166	4.4461e-101	Hem2	LOC119571371
1.00252e-104	0.531741	0.826	0.765	1.54217e-100	Hem2	LOC119595236
1.89942e-104	0.592011	0.201	0.071	2.92188e-100	Hem2	LOC119576139
4.14405e-104	0.427623	0.905	0.851	6.37479e-100	Hem2	LOC119574978
3.73093e-103	0.487557	0.142	0.036	5.73928e-99	Hem2	LOC119577829
3.82724e-103	0.553311	0.727	0.633	5.88744e-99	Hem2	LOC119586128
2.05959e-101	0.667925	0.388	0.229	3.16826e-97	Hem2	LOC119596595
3.09635e-100	0.63178	0.656	0.551	4.76311e-96	Hem2	LOC119590829
6.13149e-100	0.905046	0.764	0.646	9.43207e-96	Hem2	LOC119590721
1.06146e-98	0.600264	0.626	0.505	1.63284e-94	Hem2	LOC119598752
1.29962e-98	0.456111	0.182	0.061	1.9992e-94	Hem2	LOC119574633
2.93383e-98	0.628041	0.319	0.17	4.51311e-94	Hem2	LOC119576976
4.5265e-98	0.541528	0.754	0.68	6.96312e-94	Hem2	LOC119570358
6.07881e-98	0.545997	0.227	0.091	9.35103e-94	Hem2	LOC119596285
1.29457e-97	0.635847	0.333	0.18	1.99144e-93	Hem2	LOC119579387
4.1878e-97	0.631791	0.238	0.102	6.4421e-93	Hem2	LOC119592623
2.53734e-96	0.485068	0.16	0.05	3.90319e-92	Hem2	LOC119577043
1.31569e-95	0.665006	0.319	0.17	2.02392e-91	Hem2	LOC119597086
1.58696e-95	0.412855	0.89	0.872	2.44122e-91	Hem2	LOC119590104
7.50369e-95	0.509432	0.764	0.702	1.15429e-90	Hem2	LOC119582650
1.4128e-94	0.645397	0.487	0.349	2.17331e-90	Hem2	LOC119574390
1.29368e-93	0.577911	0.686	0.605	1.99006e-89	Hem2	LOC119570957
1.37638e-93	0.603763	0.212	0.085	2.11728e-89	Hem2	LOC119580213
1.06476e-92	0.598752	0.322	0.173	1.63793e-88	Hem2	LOC119589932
1.15111e-90	0.526905	0.728	0.65	1.77075e-86	Hem2	LOC119581621
1.99136e-90	0.537282	0.296	0.151	3.06332e-86	Hem2	LOC119574504
2.28076e-90	0.544618	0.623	0.507	3.5085e-86	Hem2	LOC119581757
3.34158e-90	0.587972	0.524	0.392	5.14035e-86	Hem2	LOC119596323
6.45538e-90	0.644493	0.397	0.239	9.93031e-86	Hem2	LOC119587072
9.25335e-90	0.558831	0.533	0.403	1.42344e-85	Hem2	LOC119597704
2.70339e-89	0.499822	0.195	0.075	4.15863e-85	Hem2	LOC119594520
6.43878e-89	0.538481	0.246	0.113	9.90478e-85	Hem2	LOC119570580
1.12405e-88	0.679117	0.283	0.145	1.72913e-84	Hem2	LOC119591389
3.1694e-88	0.334478	0.95	0.939	4.87549e-84	Hem2	LOC119573068
3.50018e-88	0.443186	0.847	0.814	5.38432e-84	Hem2	LOC119573312
4.62776e-88	0.602426	0.209	0.085	7.11888e-84	Hem2	LOC119594422
9.04825e-88	0.601234	0.42	0.278	1.39189e-83	Hem2	LOC119575285
2.10644e-87	0.55988	0.67	0.585	3.24034e-83	Hem2	LOC119582833
3.43958e-87	0.655894	0.511	0.376	5.29111e-83	Hem2	LOC119583824
4.12135e-87	0.530235	0.774	0.718	6.33987e-83	Hem2	LOC119574362
4.51273e-87	0.529483	0.162	0.055	6.94193e-83	Hem2	LOC119591435
6.16491e-87	0.572248	0.298	0.157	9.48348e-83	Hem2	LOC119577792
4.88373e-86	0.531306	0.214	0.09	7.51265e-82	Hem2	LOC119597141
3.81007e-85	0.264372	0.991	0.932	5.86103e-81	Hem2	LOC119573278
7.18512e-85	0.487035	0.212	0.09	1.10529e-80	Hem2	LOC119587029
1.96084e-84	0.518756	0.775	0.736	3.01636e-80	Hem2	LOC119571674
2.6673e-84	0.535665	0.155	0.051	4.10311e-80	Hem2	LOC119580662
4.8273e-84	0.54593	0.676	0.585	7.42583e-80	Hem2	LOC119598099
2.51072e-83	0.560348	0.228	0.103	3.86224e-79	Hem2	LOC119581834
1.28346e-82	0.482948	0.196	0.08	1.97435e-78	Hem2	LOC119577031
1.40428e-82	0.313454	0.92	0.796	2.16021e-78	Hem2	LOC119586194
2.12674e-82	0.570639	0.279	0.145	3.27157e-78	Hem2	LOC119574840
2.24617e-82	0.423611	0.899	0.882	3.45528e-78	Hem2	LOC119579214
4.42237e-82	0.583637	0.551	0.437	6.80293e-78	Hem2	LOC119585539
1.98852e-81	0.535241	0.247	0.119	3.05894e-77	Hem2	LOC119584443
2.1666e-81	0.46616	0.139	0.042	3.33288e-77	Hem2	LOC119576086
3.04376e-81	0.498528	0.277	0.146	4.68222e-77	Hem2	LOC119591985
4.45626e-81	0.502989	0.673	0.58	6.85506e-77	Hem2	LOC119593115
4.7815e-81	0.57768	0.447	0.316	7.35538e-77	Hem2	LOC119577138
5.34448e-81	0.486292	0.742	0.661	8.22142e-77	Hem2	LOC119590177
5.88828e-81	0.559668	0.386	0.247	9.05795e-77	Hem2	LOC119586273
9.43509e-81	0.603834	0.247	0.119	1.4514e-76	Hem2	LOC119594977
1.00852e-80	0.468477	0.166	0.06	1.55141e-76	Hem2	LOC119581898
1.04796e-80	0.569965	0.282	0.15	1.61208e-76	Hem2	LOC119576040
1.14337e-80	0.589485	0.553	0.438	1.75885e-76	Hem2	LOC119582468
3.95128e-80	0.649137	0.441	0.306	6.07826e-76	Hem2	LOC119585136
4.11211e-80	0.471273	0.759	0.695	6.32566e-76	Hem2	LOC119585020
5.29965e-80	0.592327	0.368	0.231	8.15244e-76	Hem2	LOC119595104
6.83889e-80	0.529767	0.641	0.547	1.05203e-75	Hem2	LOC119589280
7.23078e-80	0.670964	0.366	0.227	1.11231e-75	Hem2	LOC119577216
8.04279e-80	0.362819	0.96	0.953	1.23722e-75	Hem2	LOC119580222
1.0277e-79	0.468645	0.755	0.684	1.58091e-75	Hem2	LOC119574431
2.25013e-79	0.553782	0.334	0.2	3.46137e-75	Hem2	LOC119582502
2.5934e-79	0.508507	0.154	0.053	3.98942e-75	Hem2	LOC119593598
1.27946e-78	0.406978	0.887	0.856	1.9682e-74	Hem2	LOC119590791
1.49107e-78	0.579123	0.508	0.387	2.29372e-74	Hem2	LOC119591980
2.43268e-78	0.5285	0.184	0.074	3.7422e-74	Hem2	LOC119594543
4.37294e-78	0.598893	0.579	0.478	6.72689e-74	Hem2	LOC119578682
6.34086e-78	1.02428	0.462	0.283	9.75415e-74	Hem2	LOC119587036
1.71477e-77	0.486502	0.156	0.056	2.63783e-73	Hem2	LOC119585775
3.72456e-77	0.439564	0.788	0.727	5.72949e-73	Hem2	LOC119597204
1.35302e-76	0.510933	0.169	0.065	2.08134e-72	Hem2	LOC119577178
2.09199e-76	0.467098	0.169	0.064	3.21812e-72	Hem2	LOC119588605
2.15643e-76	0.673832	0.34	0.207	3.31724e-72	Hem2	LOC119582534
2.3975e-76	0.421259	0.816	0.79	3.68808e-72	Hem2	LOC119585756
2.72e-76	0.45037	0.17	0.065	4.18417e-72	Hem2	LOC119577875
2.80315e-76	0.536684	0.692	0.623	4.31208e-72	Hem2	LOC119583873
3.38204e-76	0.627351	0.369	0.235	5.20259e-72	Hem2	LOC119591555
5.11642e-75	0.54367	0.599	0.498	7.87059e-71	Hem2	LOC119583499
7.7364e-75	0.459617	0.775	0.741	1.19009e-70	Hem2	LOC119595777
7.89873e-75	0.595341	0.397	0.271	1.21506e-70	Hem2	LOC119588777
1.38655e-74	0.395991	0.186	0.077	2.13294e-70	Hem2	LOC119592949
2.09989e-74	0.503665	0.721	0.668	3.23026e-70	Hem2	LOC119588511
2.21162e-74	0.63015	0.633	0.548	3.40214e-70	Hem2	LOC119574215
2.48517e-74	0.387521	0.905	0.877	3.82294e-70	Hem2	LOC119577821
2.82878e-74	0.530663	0.172	0.067	4.35152e-70	Hem2	LOC119593487
6.01155e-74	0.52842	0.713	0.642	9.24757e-70	Hem2	LOC119582927
1.51928e-73	0.522696	0.558	0.451	2.33711e-69	Hem2	LOC119584807
6.02732e-73	0.592461	0.286	0.16	9.27182e-69	Hem2	LOC119586176
6.47064e-73	0.647143	0.394	0.259	9.95379e-69	Hem2	LOC119589135
7.36034e-73	0.625087	0.36	0.233	1.13224e-68	Hem2	LOC119597938
1.84901e-71	0.56194	0.225	0.109	2.84433e-67	Hem2	LOC119595863
7.72111e-71	0.519009	0.189	0.082	1.18774e-66	Hem2	LOC119575397
8.676e-71	0.468437	0.173	0.07	1.33463e-66	Hem2	LOC119575447
1.30055e-70	0.385284	0.888	0.885	2.00063e-66	Hem2	LOC119582547
1.30295e-70	0.293828	0.99	0.919	2.00433e-66	Hem2	LOC119587996
1.32845e-70	0.38361	0.844	0.801	2.04355e-66	Hem2	LOC119590667
1.57224e-70	0.52515	0.545	0.436	2.41858e-66	Hem2	LOC119587881
4.18144e-70	0.488607	0.691	0.629	6.43231e-66	Hem2	LOC119591891
5.19565e-70	0.42733	0.85	0.818	7.99246e-66	Hem2	LOC119580388
5.50352e-70	0.470308	0.144	0.052	8.46606e-66	Hem2	LOC119590541
6.365e-70	0.477444	0.759	0.671	9.79128e-66	Hem2	LOC119595879
4.00796e-69	0.4312	0.158	0.061	6.16545e-65	Hem2	LOC119590860
1.02514e-68	0.870994	0.863	0.83	1.57698e-64	Hem2	LOC119591974
1.96514e-68	0.408519	0.152	0.057	3.02297e-64	Hem2	LOC119580976
4.82091e-68	0.540867	0.343	0.217	7.416e-64	Hem2	LOC119581922
8.87819e-68	0.441908	0.735	0.686	1.36573e-63	Hem2	LOC119579354
1.16526e-67	0.276433	0.991	0.989	1.79251e-63	Hem2	LOC119575008
2.54195e-67	0.496467	0.194	0.088	3.91028e-63	Hem2	LOC119588487
2.73284e-67	0.584263	0.33	0.209	4.20393e-63	Hem2	LOC119583732
5.35813e-67	0.567991	0.385	0.259	8.24241e-63	Hem2	LOC119576117
9.82249e-67	0.401839	0.174	0.073	1.51099e-62	Hem2	LOC119587781
1.27999e-66	0.518199	0.181	0.079	1.96901e-62	Hem2	LOC119598157
1.52995e-66	0.560512	0.241	0.126	2.35352e-62	Hem2	LOC119583742
1.82591e-66	0.465998	0.27	0.151	2.80879e-62	Hem2	LOC119592554
2.61853e-66	0.517015	0.5	0.391	4.02809e-62	Hem2	LOC119582871
3.49016e-66	0.50894	0.225	0.114	5.36891e-62	Hem2	LOC119588122
3.89022e-66	0.483079	0.187	0.084	5.98432e-62	Hem2	LOC119591542
4.35325e-66	0.490024	0.664	0.596	6.6966e-62	Hem2	LOC119581792
4.44548e-66	0.43732	0.161	0.065	6.83848e-62	Hem2	LOC119594722
5.70475e-66	0.563385	0.493	0.395	8.77561e-62	Hem2	LOC119575294
9.22431e-66	0.470336	0.16	0.064	1.41897e-61	Hem2	LOC119593997
4.7536e-65	0.453519	0.133	0.047	7.31246e-61	Hem2	LOC119591556
5.77301e-65	0.521654	0.541	0.45	8.88061e-61	Hem2	LOC119583830
1.50645e-64	0.393242	0.125	0.042	2.31736e-60	Hem2	LOC119599322
2.50511e-64	0.428478	0.59	0.455	3.8536e-60	Hem2	LOC119590670
5.34322e-64	0.433039	0.196	0.092	8.21948e-60	Hem2	LOC119573071
6.06851e-64	0.423546	0.817	0.787	9.33519e-60	Hem2	LOC119584207
1.44585e-63	0.503787	0.562	0.469	2.22415e-59	Hem2	LOC119577922
2.06407e-63	0.402726	0.109	0.034	3.17516e-59	Hem2	LOC119583396
9.55401e-63	0.45106	0.158	0.065	1.46969e-58	Hem2	LOC119598269
1.09887e-62	0.369256	0.845	0.816	1.69039e-58	Hem2	LOC119586380
1.20619e-62	0.266022	0.999	0.972	1.85549e-58	Hem2	LOC119593195
1.37743e-62	0.515361	0.286	0.169	2.1189e-58	Hem2	LOC119572633
1.39882e-62	0.510548	0.423	0.313	2.15181e-58	Hem2	LOC119598251
2.50153e-62	0.430223	0.186	0.085	3.84811e-58	Hem2	LOC119573341
2.91906e-62	0.443964	0.727	0.66	4.49039e-58	Hem2	LOC119589267
5.69165e-62	0.314843	0.914	0.869	8.75547e-58	Hem2	LOC119585127
8.91575e-62	0.527441	0.544	0.445	1.37151e-57	Hem2	LOC119568194
1.21033e-61	0.368859	0.124	0.043	1.86185e-57	Hem2	LOC119580649
1.2624e-61	0.567295	0.504	0.408	1.94195e-57	Hem2	LOC119576068
1.34598e-61	0.463804	0.239	0.129	2.07052e-57	Hem2	LOC119583053
2.12556e-61	0.48423	0.279	0.165	3.26974e-57	Hem2	LOC119576779
2.19567e-61	0.481978	0.583	0.478	3.3776e-57	Hem2	LOC119599333
2.32216e-61	0.484465	0.666	0.599	3.57218e-57	Hem2	LOC119595020
3.17094e-61	0.479075	0.233	0.125	4.87786e-57	Hem2	LOC119587056
4.75919e-61	0.378627	0.826	0.782	7.32106e-57	Hem2	LOC119581864
6.75541e-61	0.556921	0.497	0.395	1.03919e-56	Hem2	LOC119586371
1.03162e-60	0.43431	0.167	0.073	1.58695e-56	Hem2	LOC119578833
1.68595e-60	0.422589	0.714	0.648	2.5935e-56	Hem2	LOC119582727
2.94259e-60	0.51238	0.284	0.171	4.52658e-56	Hem2	LOC119580203
4.33235e-60	0.530201	0.518	0.431	6.66446e-56	Hem2	LOC119582505
4.59018e-60	0.505211	0.258	0.149	7.06108e-56	Hem2	LOC119592528
7.39794e-60	0.43943	0.161	0.069	1.13803e-55	Hem2	LOC119568134
9.45414e-60	0.564342	0.377	0.26	1.45433e-55	Hem2	LOC119578452
2.16471e-59	0.459748	0.184	0.087	3.32997e-55	Hem2	LOC119578421
2.76355e-59	0.489822	0.512	0.42	4.25117e-55	Hem2	LOC119592003
5.10789e-59	0.453721	0.346	0.224	7.85747e-55	Hem2	LOC119583705
1.65259e-58	0.539867	0.441	0.335	2.54218e-54	Hem2	LOC119594514
2.38512e-58	0.400222	0.148	0.062	3.66903e-54	Hem2	LOC119595026
1.17245e-57	0.419967	0.682	0.629	1.80358e-53	Hem2	LOC119576116
1.28284e-57	0.376432	0.758	0.72	1.97339e-53	Hem2	LOC119572218
2.55407e-57	0.497053	0.479	0.381	3.92893e-53	Hem2	LOC119593180
2.7684e-57	0.51312	0.37	0.26	4.25863e-53	Hem2	LOC119588071
6.41958e-57	0.358849	0.15	0.063	9.87524e-53	Hem2	LOC119596085
1.04651e-56	0.339215	0.762	0.568	1.60984e-52	Hem2	LOC119580218
1.12728e-56	0.537376	0.466	0.369	1.7341e-52	Hem2	LOC119597034
1.92412e-56	0.494151	0.533	0.451	2.95987e-52	Hem2	LOC119577129
2.03124e-56	0.521432	0.514	0.422	3.12466e-52	Hem2	LOC119586498
3.30435e-56	0.331884	0.108	0.036	5.08308e-52	Hem2	LOC119575435
1.2297e-55	0.55032	0.381	0.273	1.89165e-51	Hem2	LOC119584439
2.15318e-55	0.836568	0.321	0.206	3.31224e-51	Hem2	LOC119585860
2.62719e-55	0.55456	0.357	0.253	4.0414e-51	Hem2	LOC119590962
2.98702e-55	0.504312	0.367	0.254	4.59493e-51	Hem2	LOC119592049
5.62103e-55	0.482746	0.521	0.446	8.64684e-51	Hem2	LOC119581914
1.28643e-54	0.471681	0.359	0.249	1.97892e-50	Hem2	LOC119596094
1.95917e-54	0.367416	0.834	0.812	3.01379e-50	Hem2	LOC119569086
3.92135e-54	0.46459	0.556	0.475	6.03221e-50	Hem2	LOC119584573
5.90212e-54	0.474161	0.484	0.397	9.07924e-50	Hem2	LOC119595421
6.60771e-54	0.45401	0.609	0.548	1.01646e-49	Hem2	LOC119597369
1.35515e-53	0.465754	0.508	0.417	2.08462e-49	Hem2	LOC119585947
2.4017e-53	0.446613	0.626	0.569	3.69454e-49	Hem2	LOC119582872
7.46829e-53	0.40168	0.183	0.09	1.14885e-48	Hem2	LOC119575259
1.21966e-52	0.360716	0.169	0.079	1.8762e-48	Hem2	LOC119588643
1.6874e-52	0.486769	0.224	0.124	2.59572e-48	Hem2	LOC119593705
1.84794e-52	0.326479	0.806	0.725	2.84268e-48	Hem2	LOC119580407
2.01085e-52	0.324758	0.253	0.144	3.09329e-48	Hem2	LOC119585687
2.30259e-52	0.531161	0.469	0.375	3.54207e-48	Hem2	LOC119571311
2.49633e-52	0.526596	0.378	0.266	3.8401e-48	Hem2	LOC119579178
2.83198e-52	0.412894	0.123	0.047	4.35643e-48	Hem2	LOC119593043
5.50312e-52	0.386971	0.184	0.092	8.46546e-48	Hem2	LOC119584673
6.37791e-52	0.443696	0.4	0.296	9.81114e-48	Hem2	LOC119596206
1.05833e-51	0.312223	0.854	0.841	1.62803e-47	Hem2	LOC119588546
2.12669e-51	0.47799	0.193	0.099	3.27149e-47	Hem2	LOC119580821
5.03853e-51	0.409433	0.651	0.609	7.75077e-47	Hem2	LOC119577148
9.38256e-51	0.446244	0.518	0.428	1.44332e-46	Hem2	LOC119583575
1.22077e-50	0.324866	0.801	0.745	1.87792e-46	Hem2	LOC119586470
1.52026e-50	0.468614	0.409	0.313	2.33862e-46	Hem2	LOC119585577
1.92982e-50	0.412798	0.621	0.542	2.96864e-46	Hem2	LOC119582537
2.17332e-50	0.405757	0.185	0.094	3.34321e-46	Hem2	LOC119568175
2.4052e-50	0.277254	0.917	0.903	3.69992e-46	Hem2	LOC119593022
2.41973e-50	0.482185	0.383	0.286	3.72227e-46	Hem2	LOC119580866
4.45162e-50	0.44106	0.614	0.56	6.84792e-46	Hem2	LOC119583664
7.67609e-50	0.44085	0.227	0.13	1.18081e-45	Hem2	LOC119573054
1.3258e-49	0.450237	0.572	0.504	2.03947e-45	Hem2	LOC119580214
2.28818e-49	0.4582	0.187	0.096	3.5199e-45	Hem2	LOC119574223
3.45567e-49	0.429638	0.496	0.419	5.31586e-45	Hem2	LOC119572905
4.41717e-49	0.432218	0.469	0.376	6.79494e-45	Hem2	LOC119589238
4.45824e-49	0.451697	0.564	0.496	6.85811e-45	Hem2	LOC119585589
4.79812e-49	0.369533	0.654	0.575	7.38094e-45	Hem2	LOC119584366
1.68123e-48	0.380888	0.766	0.752	2.58624e-44	Hem2	LOC119589222
2.08553e-48	0.400991	0.617	0.56	3.20817e-44	Hem2	LOC119571038
2.96538e-48	0.441582	0.359	0.259	4.56165e-44	Hem2	LOC119594781
3.31543e-48	0.413704	0.541	0.458	5.10012e-44	Hem2	LOC119589046
3.71365e-48	0.372486	0.135	0.058	5.71271e-44	Hem2	LOC119595457
4.19357e-48	0.440547	0.461	0.364	6.45097e-44	Hem2	LOC119597603
5.74757e-48	0.362325	0.183	0.091	8.84149e-44	Hem2	LOC119583656
8.20428e-48	0.39315	0.22	0.125	1.26206e-43	Hem2	LOC119598891
1.00387e-47	0.429705	0.251	0.153	1.54425e-43	Hem2	LOC119572908
1.04729e-47	0.312497	0.841	0.814	1.61104e-43	Hem2	LOC119580190
1.98498e-47	0.363178	0.741	0.703	3.0535e-43	Hem2	LOC119570429
2.65197e-47	0.472927	0.49	0.4	4.07953e-43	Hem2	LOC119588082
2.67971e-47	0.460057	0.335	0.238	4.1222e-43	Hem2	LOC119575042
2.91408e-47	0.571242	0.53	0.463	4.48273e-43	Hem2	LOC119569203
5.45706e-47	0.268171	0.107	0.039	8.3946e-43	Hem2	LOC119576965
5.52996e-47	0.366826	0.616	0.541	8.50674e-43	Hem2	LOC119581965
6.2391e-47	0.32349	0.123	0.05	9.5976e-43	Hem2	LOC119591584
9.24811e-47	0.3991	0.583	0.522	1.42264e-42	Hem2	LOC119590165
1.13921e-46	0.42682	0.219	0.123	1.75245e-42	Hem2	LOC119586812
1.51002e-46	0.476708	0.248	0.153	2.32286e-42	Hem2	LOC119576151
2.48439e-46	0.316834	0.141	0.063	3.82174e-42	Hem2	LOC119598977
2.86868e-46	0.483488	0.438	0.349	4.41289e-42	Hem2	LOC119589903
3.0589e-46	0.345141	0.139	0.063	4.70551e-42	Hem2	LOC119599387
4.16533e-46	0.352207	0.137	0.061	6.40752e-42	Hem2	LOC119580898
1.33793e-45	0.433449	0.568	0.513	2.05814e-41	Hem2	LOC119573294
2.77188e-45	0.349142	0.764	0.743	4.26399e-41	Hem2	LOC119579217
3.02408e-45	0.375104	0.659	0.612	4.65195e-41	Hem2	LOC119573119
3.13334e-45	0.503385	0.319	0.223	4.82002e-41	Hem2	LOC119581189
4.39729e-45	0.450007	0.461	0.384	6.76435e-41	Hem2	LOC119588197
4.60112e-45	0.348496	0.152	0.073	7.0779e-41	Hem2	LOC119582618
7.24542e-45	0.360005	0.712	0.676	1.11456e-40	Hem2	LOC119578778
7.29043e-45	0.320004	0.405	0.293	1.12149e-40	Hem2	LOC119575023
9.05048e-45	0.467515	0.29	0.196	1.39223e-40	Hem2	LOC119577215
1.85343e-44	0.487389	0.369	0.279	2.85113e-40	Hem2	LOC119581730
2.50243e-44	0.371197	0.718	0.668	3.84949e-40	Hem2	LOC119568238
4.38081e-44	0.471942	0.572	0.516	6.73899e-40	Hem2	LOC119571647
6.06061e-44	0.416473	0.567	0.508	9.32303e-40	Hem2	LOC119590583
1.22459e-43	0.303964	0.113	0.046	1.88379e-39	Hem2	LOC119571872
2.8298e-43	0.436179	0.292	0.197	4.35308e-39	Hem2	LOC119575236
7.64763e-43	0.350906	0.127	0.056	1.17644e-38	Hem2	LOC119589631
8.08986e-43	0.437289	0.277	0.185	1.24446e-38	Hem2	LOC119582440
8.13929e-43	0.413649	0.186	0.101	1.25207e-38	Hem2	LOC119578731
8.50277e-43	0.250577	0.947	0.947	1.30798e-38	Hem2	LOC119594903
1.50441e-42	0.492083	0.297	0.202	2.31424e-38	Hem2	LOC119589101
2.92163e-42	0.450003	0.229	0.14	4.49435e-38	Hem2	LOC119582763
3.39241e-42	0.444566	0.443	0.366	5.21855e-38	Hem2	LOC119573209
6.19318e-42	0.333396	0.165	0.085	9.52697e-38	Hem2	LOC119582646
9.75708e-42	0.402085	0.576	0.531	1.50093e-37	Hem2	LOC119580112
1.35198e-41	0.390129	0.628	0.569	2.07974e-37	Hem2	LOC119575404
1.59076e-41	0.254468	0.912	0.876	2.44707e-37	Hem2	LOC119576143
1.69818e-41	0.350142	0.139	0.066	2.61231e-37	Hem2	LOC119586112
1.88175e-41	0.420187	0.647	0.607	2.89469e-37	Hem2	LOC119568218
2.033e-41	0.432419	0.245	0.153	3.12736e-37	Hem2	LOC119575146
2.03539e-41	0.477307	0.472	0.396	3.13105e-37	Hem2	LOC119592934
2.3076e-41	0.289229	0.858	0.846	3.54978e-37	Hem2	LOC119584566
2.6826e-41	0.264996	0.864	0.845	4.12664e-37	Hem2	LOC119572381
4.90597e-41	0.399757	0.281	0.191	7.54686e-37	Hem2	LOC119588180
5.32829e-41	0.3514	0.644	0.602	8.19651e-37	Hem2	LOC119583806
7.67643e-41	0.439277	0.396	0.315	1.18087e-36	Hem2	LOC119584237
9.6786e-41	0.375537	0.158	0.081	1.48886e-36	Hem2	LOC119599459
1.85355e-40	0.431318	0.55	0.495	2.85131e-36	Hem2	LOC119583753
3.27546e-40	0.489782	0.327	0.24	5.03864e-36	Hem2	LOC119579405
3.42153e-40	0.453929	0.454	0.379	5.26334e-36	Hem2	LOC119584461
4.27385e-40	0.433205	0.627	0.59	6.57446e-36	Hem2	LOC119592239
4.69743e-40	0.517196	0.251	0.159	7.22605e-36	Hem2	LOC119592584
9.71991e-40	0.32954	0.13	0.06	1.49521e-35	Hem2	LOC119574462
1.25531e-39	0.437479	0.411	0.331	1.93104e-35	Hem2	LOC119592768
2.35286e-39	0.305634	0.163	0.085	3.6194e-35	Hem2	LOC119597045
2.67917e-39	0.322101	0.217	0.127	4.12137e-35	Hem2	LOC119591583
3.62431e-39	0.425121	0.522	0.468	5.57528e-35	Hem2	LOC119584312
4.12558e-39	0.317579	0.121	0.055	6.34639e-35	Hem2	LOC119597170
1.55851e-38	0.414456	0.31	0.221	2.39745e-34	Hem2	LOC119593007
1.66256e-38	0.373088	0.61	0.565	2.55752e-34	Hem2	LOC119573334
2.39669e-38	0.334491	0.717	0.66	3.68683e-34	Hem2	LOC119576776
3.02774e-38	0.390467	0.19	0.11	4.65758e-34	Hem2	LOC119582028
3.85274e-38	0.414715	0.346	0.257	5.92667e-34	Hem2	LOC119585888
4.18653e-38	0.504873	0.349	0.271	6.44014e-34	Hem2	LOC119588570
4.66794e-38	0.292291	0.105	0.044	7.1807e-34	Hem2	LOC119572323
6.23104e-38	0.454207	0.399	0.32	9.58521e-34	Hem2	LOC119572882
1.00749e-37	0.33089	0.19	0.109	1.54982e-33	Hem2	LOC119591448
1.15798e-37	0.412184	0.249	0.162	1.78133e-33	Hem2	LOC119592632
2.05073e-37	0.418805	0.316	0.23	3.15463e-33	Hem2	LOC119575396
2.13263e-37	0.371686	0.587	0.539	3.28063e-33	Hem2	LOC119572275
4.68016e-37	0.365617	0.221	0.135	7.1995e-33	Hem2	LOC119573048
5.29132e-37	0.352735	0.187	0.109	8.13964e-33	Hem2	LOC119588680
9.52517e-37	0.29132	0.109	0.048	1.46526e-32	Hem2	LOC119583843
1.13649e-36	0.412269	0.639	0.6	1.74827e-32	Hem2	LOC119578821
1.19561e-36	0.378051	0.251	0.166	1.83921e-32	Hem2	LOC119574631
1.83359e-36	0.330915	0.702	0.695	2.82062e-32	Hem2	LOC119588224
1.99498e-36	0.381625	0.167	0.093	3.06888e-32	Hem2	LOC119576979
3.12536e-36	0.280247	0.815	0.804	4.80774e-32	Hem2	LOC119595823
3.95155e-36	0.390828	0.432	0.363	6.07867e-32	Hem2	LOC119580916
5.35729e-36	0.375933	0.2	0.12	8.24111e-32	Hem2	LOC119596939
6.41087e-36	0.400449	0.199	0.12	9.86184e-32	Hem2	LOC119573103
1.33866e-35	0.308058	0.793	0.785	2.05926e-31	Hem2	LOC119599447
1.42287e-35	0.411445	0.64	0.607	2.1888e-31	Hem2	LOC119593033
2.27838e-35	0.355292	0.155	0.083	3.50483e-31	Hem2	LOC119578706
2.53618e-35	0.419797	0.345	0.265	3.90141e-31	Hem2	LOC119595270
2.80988e-35	0.372823	0.427	0.341	4.32243e-31	Hem2	LOC119586292
3.05787e-35	0.466344	0.325	0.243	4.70392e-31	Hem2	LOC119573380
1.07485e-34	0.375423	0.197	0.119	1.65344e-30	Hem2	LOC119589814
1.25993e-34	0.429794	0.328	0.248	1.93815e-30	Hem2	LOC119577196
1.67692e-34	0.388208	0.451	0.382	2.5796e-30	Hem2	LOC119581105
2.26591e-34	0.317599	0.119	0.057	3.48565e-30	Hem2	LOC119588727
2.54092e-34	0.396261	0.212	0.133	3.90869e-30	Hem2	LOC119597351
2.90749e-34	0.285379	0.106	0.047	4.47259e-30	Hem2	LOC119579516
1.02589e-33	0.414461	0.426	0.36	1.57813e-29	Hem2	LOC119591238
1.09371e-33	0.358808	0.623	0.595	1.68246e-29	Hem2	LOC119581003
1.53127e-33	0.398042	0.342	0.262	2.35555e-29	Hem2	LOC119579018
1.92526e-33	0.376434	0.496	0.44	2.96163e-29	Hem2	LOC119572990
1.97104e-33	0.43292	0.353	0.28	3.03206e-29	Hem2	LOC119599273
4.86156e-33	0.408172	0.192	0.117	7.47854e-29	Hem2	LOC119596321
6.14366e-33	0.342106	0.235	0.151	9.4508e-29	Hem2	LOC119589079
6.77811e-33	0.376637	0.625	0.615	1.04268e-28	Hem2	LOC119568374
9.67923e-33	0.292083	0.127	0.064	1.48896e-28	Hem2	LOC119598220
9.87156e-33	0.423111	0.492	0.441	1.51854e-28	Hem2	LOC119580887
2.03286e-32	0.262277	0.102	0.046	3.12715e-28	Hem2	LOC119592174
2.89284e-32	0.397471	0.428	0.362	4.45005e-28	Hem2	LOC119587347
3.5497e-32	0.42343	0.309	0.227	5.4605e-28	Hem2	LOC119596533
3.59406e-32	0.438675	0.449	0.397	5.52874e-28	Hem2	LOC119580862
4.29734e-32	0.360092	0.315	0.237	6.6106e-28	Hem2	LOC119574393
6.06286e-32	0.326247	0.58	0.545	9.3265e-28	Hem2	LOC119574252
6.13985e-32	0.37518	0.494	0.438	9.44493e-28	Hem2	LOC119578841
6.73292e-32	0.380365	0.439	0.375	1.03573e-27	Hem2	LOC119573173
1.06044e-31	0.288898	0.724	0.712	1.63127e-27	Hem2	LOC119581974
1.45692e-31	0.369998	0.492	0.442	2.24117e-27	Hem2	LOC119589986
1.67539e-31	0.34919	0.463	0.409	2.57725e-27	Hem2	LOC119590548
1.82171e-31	0.396413	0.536	0.493	2.80234e-27	Hem2	LOC119579389
2.94084e-31	0.356122	0.516	0.469	4.52389e-27	Hem2	LOC119591305
6.13405e-31	0.435605	0.297	0.218	9.43601e-27	Hem2	LOC119584376
1.40042e-30	0.27641	0.141	0.076	2.15426e-26	Hem2	LOC119582027
1.79496e-30	0.387175	0.451	0.388	2.76119e-26	Hem2	LOC119581944
2.30427e-30	0.40564	0.399	0.336	3.54465e-26	Hem2	LOC119578763
2.92202e-30	0.317248	0.708	0.695	4.49494e-26	Hem2	LOC119568149
3.29762e-30	0.398182	0.409	0.345	5.07273e-26	Hem2	LOC119591319
3.63317e-30	0.34883	0.206	0.133	5.58891e-26	Hem2	LOC119580838
3.77884e-30	0.357719	0.398	0.331	5.81299e-26	Hem2	LOC119595526
4.12449e-30	0.322296	0.139	0.076	6.34471e-26	Hem2	LOC119576978
4.23594e-30	0.424179	0.403	0.341	6.51615e-26	Hem2	LOC119592475
5.8335e-30	0.266771	0.104	0.049	8.97368e-26	Hem2	LOC119580363
7.97666e-30	0.359689	0.199	0.128	1.22705e-25	Hem2	LOC119575310
8.87264e-30	0.342009	0.503	0.46	1.36488e-25	Hem2	LOC119582860
9.80903e-30	0.275829	0.122	0.063	1.50892e-25	Hem2	LOC119582014
1.12558e-29	0.375212	0.329	0.259	1.73147e-25	Hem2	LOC119595423
1.4239e-29	0.373904	0.214	0.141	2.19038e-25	Hem2	LOC119591557
1.54809e-29	0.392806	0.254	0.182	2.38143e-25	Hem2	LOC119588498
1.76254e-29	0.313038	0.15	0.086	2.71132e-25	Hem2	LOC119589572
2.72335e-29	0.374776	0.398	0.34	4.18932e-25	Hem2	LOC119574174
5.55871e-29	0.322789	0.179	0.11	8.55096e-25	Hem2	LOC119578984
7.18556e-29	0.346414	0.212	0.14	1.10535e-24	Hem2	LOC119586442
1.28834e-28	0.362676	0.231	0.16	1.98186e-24	Hem2	LOC119578414
1.45282e-28	0.351263	0.633	0.613	2.23487e-24	Hem2	LOC119582491
3.22882e-28	0.358291	0.294	0.223	4.9669e-24	Hem2	LOC119590706
3.93975e-28	0.338843	0.182	0.115	6.06052e-24	Hem2	LOC119593706
4.66968e-28	0.280496	0.506	0.45	7.18337e-24	Hem2	LOC119593121
4.68267e-28	0.337839	0.467	0.424	7.20335e-24	Hem2	LOC119591266
4.82453e-28	0.335798	0.209	0.132	7.42158e-24	Hem2	LOC119581130
5.50456e-28	0.368445	0.414	0.356	8.46767e-24	Hem2	LOC119592457
5.73876e-28	0.270375	0.109	0.054	8.82794e-24	Hem2	LOC119589891
5.82785e-28	0.442253	0.48	0.43	8.96499e-24	Hem2	LOC119592965
9.89953e-28	0.372813	0.311	0.243	1.52284e-23	Hem2	LOC119595041
1.34614e-27	0.369695	0.423	0.359	2.07077e-23	Hem2	LOC119580564
1.34994e-27	0.30094	0.173	0.107	2.07661e-23	Hem2	LOC119581869
1.46127e-27	0.420822	0.363	0.297	2.24787e-23	Hem2	LOC119595147
1.64087e-27	0.347241	0.239	0.169	2.52414e-23	Hem2	LOC119596336
2.76017e-27	0.411751	0.415	0.359	4.24597e-23	Hem2	LOC119598109
1.0753e-26	0.339716	0.25	0.181	1.65413e-22	Hem2	LOC119585824
1.39973e-26	0.319036	0.229	0.16	2.15321e-22	Hem2	LOC119591320
1.88915e-26	0.252525	0.815	0.814	2.90608e-22	Hem2	LOC119568243
2.15627e-26	0.263362	0.16	0.097	3.31699e-22	Hem2	LOC119584530
2.20243e-26	0.316855	0.227	0.159	3.38799e-22	Hem2	LOC119577105
2.42712e-26	0.392499	0.294	0.223	3.73364e-22	Hem2	LOC119587369
2.69876e-26	0.318303	0.462	0.415	4.1515e-22	Hem2	LOC119580279
2.93458e-26	0.339488	0.279	0.208	4.51427e-22	Hem2	LOC119583676
4.08802e-26	0.323819	0.215	0.147	6.2886e-22	Hem2	LOC119595101
4.19837e-26	0.332009	0.212	0.144	6.45835e-22	Hem2	LOC119596153
4.24838e-26	0.356788	0.235	0.168	6.53528e-22	Hem2	LOC119576216
5.57289e-26	0.35248	0.354	0.292	8.57278e-22	Hem2	LOC119586688
7.4805e-26	0.361549	0.395	0.339	1.15072e-21	Hem2	LOC119580340
8.27032e-26	0.325734	0.568	0.53	1.27222e-21	Hem2	LOC119572197
8.54545e-26	0.291142	0.162	0.098	1.31455e-21	Hem2	LOC119574926
9.6672e-26	0.359509	0.36	0.3	1.48711e-21	Hem2	LOC119578836
1.38137e-25	0.404079	0.316	0.255	2.12496e-21	Hem2	LOC119577755
1.3878e-25	0.309335	0.192	0.127	2.13485e-21	Hem2	LOC119589933
1.44031e-25	0.289066	0.117	0.063	2.21562e-21	Hem2	LOC119593476
1.52308e-25	0.366888	0.314	0.248	2.34296e-21	Hem2	LOC119583700
1.60251e-25	0.325415	0.462	0.415	2.46515e-21	Hem2	LOC119583812
1.60736e-25	0.304235	0.175	0.111	2.4726e-21	Hem2	LOC119599388
1.63776e-25	0.317163	0.174	0.111	2.51936e-21	Hem2	LOC119583787
1.86191e-25	0.369824	0.292	0.226	2.86417e-21	Hem2	LOC119577036
2.56424e-25	0.336164	0.226	0.161	3.94457e-21	Hem2	LOC119579345
2.98021e-25	0.279713	0.116	0.063	4.58445e-21	Hem2	LOC119576955
4.21303e-25	0.400755	0.381	0.318	6.48091e-21	Hem2	LOC119596844
5.44679e-25	0.340898	0.27	0.204	8.37879e-21	Hem2	LOC119578900
6.49525e-25	0.277088	0.131	0.075	9.99165e-21	Hem2	LOC119585847
7.3834e-25	0.361732	0.44	0.395	1.13579e-20	Hem2	LOC119571655
8.12049e-25	0.298037	0.145	0.087	1.24917e-20	Hem2	LOC119578964
9.60764e-25	0.270034	0.156	0.095	1.47794e-20	Hem2	LOC119569243
1.66937e-24	0.359653	0.278	0.215	2.56799e-20	Hem2	LOC119574157
1.89174e-24	0.273466	0.109	0.058	2.91007e-20	Hem2	LOC119581191
2.56158e-24	0.27445	0.125	0.071	3.94048e-20	Hem2	LOC119595751
2.63121e-24	0.376692	0.419	0.367	4.04758e-20	Hem2	LOC119570263
4.64494e-24	0.329303	0.184	0.122	7.14531e-20	Hem2	LOC119593144
5.63287e-24	0.308983	0.235	0.17	8.66504e-20	Hem2	LOC119591261
6.99986e-24	0.331425	0.244	0.178	1.07679e-19	Hem2	LOC119573288
8.4364e-24	0.326915	0.295	0.232	1.29777e-19	Hem2	LOC119588076
1.14025e-23	0.358421	0.37	0.316	1.75404e-19	Hem2	LOC119580867
1.38412e-23	0.370649	0.34	0.281	2.12918e-19	Hem2	LOC119592590
1.42257e-23	0.320976	0.169	0.11	2.18834e-19	Hem2	LOC119578115
1.4421e-23	0.326524	0.309	0.245	2.21839e-19	Hem2	LOC119589982
1.66185e-23	0.278342	0.129	0.074	2.55643e-19	Hem2	LOC119591841
1.9465e-23	0.348226	0.375	0.321	2.99431e-19	Hem2	LOC119576214
2.45078e-23	0.368041	0.451	0.409	3.77003e-19	Hem2	LOC119568349
3.67681e-23	0.343621	0.43	0.388	5.65604e-19	Hem2	LOC119579432
3.68128e-23	0.284269	0.108	0.059	5.66291e-19	Hem2	LOC119583571
6.52658e-23	0.384903	0.28	0.219	1.00398e-18	Hem2	LOC119574687
8.27706e-23	0.488053	0.254	0.19	1.27326e-18	Hem2	LOC119596147
9.03224e-23	0.394251	0.459	0.408	1.38943e-18	Hem2	LOC119581058
9.2743e-23	0.308937	0.196	0.134	1.42667e-18	Hem2	LOC119579519
1.32544e-22	0.304866	0.185	0.125	2.03892e-18	Hem2	LOC119599295
1.5299e-22	0.3263	0.355	0.297	2.35344e-18	Hem2	LOC119576395
1.77224e-22	0.324505	0.422	0.376	2.72623e-18	Hem2	LOC119594660
2.23226e-22	0.320293	0.586	0.551	3.43389e-18	Hem2	LOC119572247
2.44235e-22	0.278594	0.142	0.088	3.75707e-18	Hem2	LOC119575076
2.5601e-22	0.31877	0.478	0.449	3.9382e-18	Hem2	LOC119596293
3.32207e-22	0.314278	0.387	0.333	5.11034e-18	Hem2	LOC119571062
3.5684e-22	0.375416	0.181	0.122	5.48927e-18	Hem2	LOC119578378
3.58936e-22	0.384062	0.351	0.3	5.52151e-18	Hem2	LOC119592630
6.1422e-22	0.343875	0.407	0.361	9.44855e-18	Hem2	LOC119586832
1.06108e-21	0.296694	0.204	0.144	1.63226e-17	Hem2	LOC119576244
1.17063e-21	0.30621	0.247	0.186	1.80078e-17	Hem2	LOC119596590
1.30255e-21	0.293524	0.555	0.53	2.00372e-17	Hem2	LOC119599367
1.4492e-21	0.344217	0.391	0.347	2.2293e-17	Hem2	LOC119594378
1.71761e-21	0.305935	0.285	0.221	2.6422e-17	Hem2	LOC119576791
2.08586e-21	0.346234	0.383	0.332	3.20869e-17	Hem2	LOC119572900
2.08889e-21	0.287534	0.514	0.474	3.21334e-17	Hem2	LOC119594454
2.79326e-21	0.33827	0.373	0.325	4.29688e-17	Hem2	LOC119578155
3.49376e-21	0.297935	0.194	0.135	5.37445e-17	Hem2	LOC119577000
4.02629e-21	0.326877	0.224	0.164	6.19364e-17	Hem2	LOC119590997
4.65391e-21	0.330735	0.29	0.231	7.15911e-17	Hem2	LOC119591245
5.76963e-21	0.306731	0.309	0.254	8.87543e-17	Hem2	LOC119582184
5.83357e-21	0.364883	0.286	0.225	8.97377e-17	Hem2	LOC119597769
6.69187e-21	0.325581	0.528	0.497	1.02941e-16	Hem2	LOC119579551
8.31127e-21	0.278022	0.173	0.117	1.27852e-16	Hem2	LOC119585221
9.07894e-21	0.316329	0.288	0.226	1.39661e-16	Hem2	LOC119588467
1.04322e-20	0.26534	0.191	0.134	1.60478e-16	Hem2	LOC119582050
1.11884e-20	0.346815	0.345	0.294	1.72111e-16	Hem2	LOC119572428
1.14433e-20	0.310975	0.181	0.123	1.76033e-16	Hem2	LOC119590701
1.93799e-20	0.296967	0.235	0.177	2.98121e-16	Hem2	LOC119574668
1.9575e-20	0.295925	0.209	0.147	3.01122e-16	Hem2	LOC119580173
3.73828e-20	0.286522	0.261	0.203	5.7506e-16	Hem2	LOC119575185
3.89975e-20	0.312652	0.277	0.22	5.99898e-16	Hem2	LOC119585855
3.9646e-20	0.303148	0.133	0.083	6.09875e-16	Hem2	LOC119591501
4.97847e-20	0.299149	0.26	0.202	7.65839e-16	Hem2	LOC119585692
5.47264e-20	0.281763	0.181	0.124	8.41855e-16	Hem2	LOC119587713
7.62466e-20	0.320106	0.336	0.287	1.1729e-15	Hem2	LOC119597749
7.62788e-20	0.287003	0.226	0.166	1.1734e-15	Hem2	LOC119581108
8.83106e-20	0.270619	0.151	0.098	1.35848e-15	Hem2	LOC119585819
1.01068e-19	0.326793	0.337	0.288	1.55472e-15	Hem2	LOC119586483
1.60739e-19	0.333533	0.417	0.379	2.47265e-15	Hem2	LOC119594361
1.7695e-19	0.256078	0.209	0.15	2.72202e-15	Hem2	LOC119574232
1.83417e-19	0.310854	0.19	0.133	2.82151e-15	Hem2	LOC119576389
2.0824e-19	0.475307	0.605	0.605	3.20335e-15	Hem2	LOC119593117
2.36833e-19	0.342112	0.39	0.352	3.6432e-15	Hem2	LOC119586458
3.14189e-19	0.251488	0.238	0.175	4.83317e-15	Hem2	LOC119589257
3.56143e-19	0.250059	0.1	0.056	5.47855e-15	Hem2	LOC119572269
4.36369e-19	0.329861	0.508	0.489	6.71267e-15	Hem2	LOC119597169
5.62913e-19	0.335157	0.294	0.241	8.6593e-15	Hem2	LOC119578823
5.85113e-19	0.289523	0.549	0.536	9.00079e-15	Hem2	LOC119599506
6.55039e-19	0.294679	0.226	0.17	1.00765e-14	Hem2	LOC119577177
8.6122e-19	0.3299	0.223	0.169	1.32481e-14	Hem2	LOC119577778
9.37103e-19	0.309347	0.247	0.193	1.44155e-14	Hem2	LOC119593722
1.28076e-18	0.260162	0.135	0.085	1.9702e-14	Hem2	LOC119592526
1.54612e-18	0.284144	0.243	0.185	2.3784e-14	Hem2	LOC119597875
1.82464e-18	0.252271	0.629	0.623	2.80685e-14	Hem2	LOC119576951
2.21766e-18	0.331034	0.315	0.264	3.41143e-14	Hem2	LOC119587811
3.03321e-18	0.289985	0.142	0.093	4.66598e-14	Hem2	LOC119576361
3.34355e-18	0.307353	0.272	0.22	5.14339e-14	Hem2	LOC119580327
3.54861e-18	0.287009	0.162	0.111	5.45883e-14	Hem2	LOC119592082
4.03588e-18	0.312334	0.308	0.258	6.20839e-14	Hem2	LOC119587706
5.9052e-18	0.292086	0.492	0.468	9.08396e-14	Hem2	LOC119594050
7.57568e-18	0.25757	0.173	0.121	1.16537e-13	Hem2	LOC119585714
8.75228e-18	0.251024	0.144	0.095	1.34636e-13	Hem2	LOC119576289
1.16314e-17	0.313933	0.206	0.152	1.78927e-13	Hem2	LOC119596295
1.37799e-17	0.273507	0.184	0.132	2.11976e-13	Hem2	LOC119575463
1.47892e-17	0.283981	0.201	0.145	2.27502e-13	Hem2	LOC119568143
2.96029e-17	0.263363	0.168	0.116	4.55381e-13	Hem2	LOC119583565
3.70535e-17	0.320173	0.378	0.339	5.69994e-13	Hem2	LOC119574289
3.79199e-17	0.262338	0.221	0.167	5.83322e-13	Hem2	LOC119586425
4.38272e-17	0.325161	0.33	0.282	6.74194e-13	Hem2	LOC119591307
5.22473e-17	0.335201	0.223	0.171	8.0372e-13	Hem2	LOC119568383
6.07841e-17	0.26321	0.547	0.499	9.35041e-13	Hem2	LOC119597843
6.55738e-17	0.254673	0.161	0.113	1.00872e-12	Hem2	LOC119574480
1.17206e-16	0.295644	0.318	0.27	1.80299e-12	Hem2	LOC119583865
1.17581e-16	0.281128	0.618	0.612	1.80875e-12	Hem2	LOC119573999
1.20882e-16	0.292619	0.213	0.164	1.85953e-12	Hem2	LOC119580882
1.25441e-16	0.390749	0.363	0.325	1.92966e-12	Hem2	LOC119582462
1.77239e-16	0.29463	0.461	0.439	2.72647e-12	Hem2	LOC119591310
1.84561e-16	0.251753	0.12	0.076	2.8391e-12	Hem2	LOC119574372
2.15831e-16	0.289105	0.434	0.406	3.32013e-12	Hem2	LOC119596315
2.16744e-16	0.261363	0.15	0.101	3.33418e-12	Hem2	LOC119574262
3.27677e-16	0.263303	0.147	0.1	5.04065e-12	Hem2	LOC119593066
4.19016e-16	0.293317	0.177	0.128	6.44572e-12	Hem2	LOC119589236
5.87146e-16	0.260281	0.439	0.4	9.03206e-12	Hem2	LOC119568762
6.27458e-16	0.313948	0.182	0.135	9.65219e-12	Hem2	LOC119596872
7.67801e-16	0.320084	0.336	0.294	1.18111e-11	Hem2	LOC119594197
8.02174e-16	0.269518	0.279	0.229	1.23398e-11	Hem2	LOC119599218
8.10506e-16	0.296639	0.359	0.322	1.2468e-11	Hem2	LOC119596294
8.56018e-16	0.308144	0.529	0.521	1.31681e-11	Hem2	LOC119578779
8.80834e-16	0.361861	0.371	0.331	1.35499e-11	Hem2	LOC119590042
9.33588e-16	0.363848	0.407	0.375	1.43614e-11	Hem2	LOC119574654
1.272e-15	0.257206	0.163	0.117	1.95671e-11	Hem2	LOC119577468
1.3572e-15	0.310534	0.432	0.401	2.08779e-11	Hem2	LOC119580966
1.49477e-15	0.329104	0.302	0.258	2.2994e-11	Hem2	LOC119570527
1.89395e-15	0.295392	0.154	0.109	2.91346e-11	Hem2	LOC119592034
2.47974e-15	0.318435	0.255	0.21	3.81458e-11	Hem2	LOC119589329
3.05725e-15	0.294952	0.555	0.546	4.70296e-11	Hem2	LOC119589696
3.40946e-15	0.300052	0.482	0.457	5.24478e-11	Hem2	LOC119583613
3.45332e-15	0.264518	0.199	0.152	5.31224e-11	Hem2	LOC119575407
3.8333e-15	0.327651	0.464	0.448	5.89677e-11	Hem2	LOC119577883
4.82931e-15	0.302809	0.252	0.209	7.42893e-11	Hem2	LOC119580062
5.34101e-15	0.262333	0.253	0.205	8.21607e-11	Hem2	LOC119576238
6.72051e-15	0.253334	0.207	0.16	1.03382e-10	Hem2	LOC119591278
6.92458e-15	0.30411	0.207	0.158	1.06521e-10	Hem2	LOC119574566
8.7311e-15	0.266137	0.19	0.141	1.34311e-10	Hem2	LOC119581953
1.04512e-14	0.258848	0.204	0.155	1.6077e-10	Hem2	LOC119576128
1.08298e-14	0.312473	0.605	0.597	1.66594e-10	Hem2	LOC119572303
1.57594e-14	0.325745	0.55	0.552	2.42426e-10	Hem2	LOC119595070
1.60457e-14	0.29631	0.29	0.244	2.46831e-10	Hem2	LOC119576407
1.71736e-14	0.273081	0.334	0.291	2.64181e-10	Hem2	LOC119595767
2.97945e-14	0.293699	0.227	0.181	4.5833e-10	Hem2	LOC119589143
4.59775e-14	0.312037	0.334	0.299	7.07272e-10	Hem2	LOC119579229
5.55931e-14	0.268305	0.471	0.457	8.55189e-10	Hem2	LOC119591504
5.86687e-14	0.29182	0.332	0.292	9.025e-10	Hem2	LOC119592220
6.92468e-14	0.27619	0.276	0.233	1.06522e-09	Hem2	LOC119596902
7.69498e-14	0.290129	0.254	0.213	1.18372e-09	Hem2	LOC119589972
1.01416e-13	0.256166	0.415	0.393	1.56008e-09	Hem2	LOC119576954
1.19933e-13	0.305308	0.414	0.388	1.84493e-09	Hem2	LOC119583697
1.30439e-13	0.279295	0.23	0.188	2.00654e-09	Hem2	LOC119596388
1.33798e-13	0.254523	0.562	0.565	2.05822e-09	Hem2	LOC119573340
1.49145e-13	0.269608	0.182	0.138	2.2943e-09	Hem2	LOC119568423
1.51243e-13	0.306116	0.4	0.37	2.32657e-09	Hem2	LOC119598228
1.58784e-13	0.316851	0.266	0.227	2.44257e-09	Hem2	LOC119585879
1.90706e-13	0.267787	0.289	0.25	2.93364e-09	Hem2	LOC119598212
2.00463e-13	0.278458	0.249	0.208	3.08373e-09	Hem2	LOC119589402
2.63755e-13	0.295938	0.423	0.396	4.05734e-09	Hem2	LOC119595106
4.86106e-13	0.257147	0.35	0.315	7.47777e-09	Hem2	LOC119579240
5.92614e-13	0.280594	0.366	0.335	9.11619e-09	Hem2	LOC119568104
7.14016e-13	0.310798	0.279	0.242	1.09837e-08	Hem2	LOC119595676
8.67825e-13	0.250446	0.446	0.412	1.33498e-08	Hem2	LOC119570894
9.67711e-13	0.298447	0.284	0.246	1.48863e-08	Hem2	LOC119593129
1.0297e-12	0.271864	0.448	0.431	1.58399e-08	Hem2	LOC119585833
1.23453e-12	0.257386	0.212	0.171	1.89908e-08	Hem2	LOC119576796
1.40659e-12	0.259772	0.396	0.372	2.16375e-08	Hem2	LOC119581171
1.6098e-12	0.259552	0.465	0.453	2.47635e-08	Hem2	LOC119593352
2.36999e-12	0.283042	0.325	0.291	3.64576e-08	Hem2	LOC119576059
2.96983e-12	0.285267	0.191	0.15	4.56849e-08	Hem2	LOC119572195
3.37192e-12	0.254536	0.365	0.333	5.18703e-08	Hem2	LOC119598650
3.58882e-12	0.269715	0.415	0.393	5.52068e-08	Hem2	LOC119584493
4.07267e-12	0.258422	0.33	0.295	6.26499e-08	Hem2	LOC119593146
4.52609e-12	0.267692	0.19	0.151	6.96249e-08	Hem2	LOC119585661
5.22747e-12	0.264605	0.367	0.342	8.04142e-08	Hem2	LOC119593042
5.77771e-12	0.332882	0.373	0.351	8.88786e-08	Hem2	LOC119577860
6.44738e-12	0.252673	0.408	0.388	9.91801e-08	Hem2	LOC119598497
9.62286e-12	0.276681	0.267	0.231	1.48028e-07	Hem2	LOC119595859
1.12605e-11	0.269068	0.303	0.27	1.7322e-07	Hem2	LOC119576828
1.26719e-11	0.26471	0.255	0.217	1.94931e-07	Hem2	LOC119573280
1.48166e-11	0.271821	0.193	0.153	2.27924e-07	Hem2	LOC119598740
1.49003e-11	0.256254	0.317	0.272	2.29211e-07	Hem2	LOC119574216
1.64297e-11	0.281008	0.3	0.27	2.52738e-07	Hem2	LOC119581884
1.66818e-11	0.254337	0.469	0.459	2.56616e-07	Hem2	LOC119588080
2.08182e-11	0.251863	0.175	0.135	3.20246e-07	Hem2	LOC119593918
2.19923e-11	0.303572	0.236	0.199	3.38308e-07	Hem2	LOC119581022
3.94827e-11	0.250395	0.407	0.382	6.07362e-07	Hem2	LOC119574635
4.72069e-11	0.287861	0.388	0.37	7.26184e-07	Hem2	LOC119581741
5.02528e-11	0.306624	0.237	0.196	7.73038e-07	Hem2	LOC119582489
8.2415e-11	0.263364	0.28	0.247	1.26779e-06	Hem2	LOC119599268
9.84982e-11	0.253085	0.386	0.362	1.5152e-06	Hem2	LOC119596308
1.10188e-10	0.311534	0.353	0.329	1.69503e-06	Hem2	LOC119574127
1.12295e-10	0.275709	0.223	0.186	1.72744e-06	Hem2	LOC119576273
1.13507e-10	0.271063	0.238	0.201	1.74608e-06	Hem2	LOC119575423
1.43827e-10	0.277062	0.406	0.39	2.21249e-06	Hem2	LOC119580117
1.54846e-10	0.260773	0.188	0.149	2.382e-06	Hem2	LOC119568025
1.67012e-10	0.276552	0.408	0.391	2.56915e-06	Hem2	LOC119572319
1.97417e-10	0.302017	0.31	0.281	3.03687e-06	Hem2	LOC119577681
2.50757e-10	0.250294	0.33	0.303	3.8574e-06	Hem2	LOC119574137
3.16417e-10	0.296069	0.303	0.275	4.86744e-06	Hem2	LOC119598314
3.90668e-10	0.251484	0.39	0.374	6.00965e-06	Hem2	LOC119572972
4.22868e-10	0.254326	0.158	0.124	6.50498e-06	Hem2	LOC119586386
6.03311e-10	0.25921	0.441	0.431	9.28073e-06	Hem2	LOC119589992
6.91676e-10	0.266827	0.345	0.318	1.064e-05	Hem2	LOC119580045
7.4736e-10	0.261739	0.285	0.253	1.14966e-05	Hem2	LOC119596587
8.93702e-10	0.273157	0.291	0.262	1.37478e-05	Hem2	LOC119568347
1.45624e-09	0.259077	0.365	0.349	2.24013e-05	Hem2	LOC119575260
1.85202e-09	0.264666	0.238	0.208	2.84896e-05	Hem2	LOC119592451
2.18392e-09	0.289389	0.331	0.307	3.35952e-05	Hem2	LOC119572214
2.87087e-09	0.283728	0.299	0.278	4.41625e-05	Hem2	LOC119588538
5.05825e-09	0.256823	0.235	0.202	7.78111e-05	Hem2	LOC119581964
6.01365e-09	0.261045	0.215	0.181	9.2508e-05	Hem2	LOC119599071
7.30421e-09	0.262108	0.355	0.34	0.000112361	Hem2	LOC119586343
8.16131e-09	0.252035	0.581	0.603	0.000125545	Hem2	LOC119572387
3.01452e-08	0.282881	0.287	0.263	0.000463724	Hem2	LOC119591323
3.35272e-08	0.25885	0.406	0.399	0.00051575	Hem2	LOC119597120
3.41832e-08	0.279618	0.318	0.298	0.00052584	Hem2	LOC119587947
3.46782e-08	0.259358	0.376	0.368	0.000533454	Hem2	LOC119578172
3.54065e-08	0.28672	0.3	0.28	0.000544657	Hem2	LOC119592542
6.94619e-08	0.696503	0.309	0.298	0.00106853	Hem2	LOC119582503
7.86016e-08	0.280421	0.202	0.175	0.00120913	Hem2	LOC119599363
1.15307e-07	0.257741	0.293	0.273	0.00177377	Hem2	LOC119574473
1.21834e-07	0.264469	0.266	0.24	0.00187417	Hem2	LOC119583751
1.37129e-07	0.263073	0.439	0.441	0.00210946	Hem2	LOC119598137
1.78298e-07	0.258202	0.345	0.325	0.00274276	Hem2	LOC119582359
1.82154e-07	0.254254	0.18	0.152	0.00280208	Hem2	LOC119585269
2.35575e-07	0.283536	0.245	0.219	0.00362385	Hem2	LOC119576312
3.97543e-07	0.293881	0.355	0.345	0.0061154	Hem2	LOC119581033
9.58145e-07	0.2826	0.372	0.359	0.0147391	Hem2	LOC119581005
0	3.36233	0.617	0.267	0	Hem3	LOC119588599
0	2.17612	0.843	0.237	0	Hem3	LOC119590490
0	2.08741	0.998	0.574	0	Hem3	LOC119595716
0	2.03217	0.912	0.362	0	Hem3	LOC119580256
0	1.8667	1	0.749	0	Hem3	LOC119574873
0	1.78733	0.632	0.216	0	Hem3	LOC119589100
0	1.76199	0.929	0.304	0	Hem3	LOC119590501
0	1.73766	0.859	0.392	0	Hem3	LOC119590513
0	1.67883	0.997	0.592	0	Hem3	LOC119596884
0	1.60541	0.682	0.236	0	Hem3	LOC119580157
0	1.58041	0.834	0.25	0	Hem3	LOC119596883
0	1.57503	0.95	0.51	0	Hem3	LOC119596858
0	1.55338	0.856	0.249	0	Hem3	LOC119568039
0	1.48016	0.96	0.368	0	Hem3	LOC119595715
0	1.39928	0.658	0.199	0	Hem3	LOC119588935
0	1.2501	0.895	0.297	0	Hem3	LOC119597846
0	0.872985	0.907	0.507	0	Hem3	LOC119580811
6.08009e-294	0.878919	0.876	0.459	9.35299e-290	Hem3	LOC119597786
2.45137e-293	1.17926	0.973	0.832	3.77095e-289	Hem3	LOC119593841
1.85876e-277	0.762369	0.799	0.372	2.85933e-273	Hem3	LOC119580231
6.2921e-275	1.58911	0.654	0.259	9.67914e-271	Hem3	LOC119594996
1.11029e-265	3.04972	0.588	0.316	1.70796e-261	Hem3	LOC119588600
1.24873e-256	0.541436	1	0.992	1.92092e-252	Hem3	LOC119589497
2.34163e-242	0.517687	0.758	0.319	3.60213e-238	Hem3	LOC119597527
1.93665e-227	0.552719	0.635	0.232	2.97914e-223	Hem3	LOC119586939
3.44344e-220	0.71803	0.995	0.937	5.29704e-216	Hem3	LOC119584303
5.21269e-219	0.807349	0.52	0.178	8.01868e-215	Hem3	LOC119596189
7.48461e-215	0.664338	0.541	0.199	1.15136e-210	Hem3	LOC119599375
4.63009e-203	0.636668	0.987	0.919	7.12246e-199	Hem3	LOC119579404
1.38214e-198	0.769367	0.701	0.352	2.12615e-194	Hem3	LOC119589787
4.16793e-190	0.965315	0.579	0.251	6.41152e-186	Hem3	LOC119586475
6.04371e-169	0.875337	0.996	0.85	9.29704e-165	Hem3	LOC119586224
1.27864e-168	1.45558	0.404	0.15	1.96693e-164	Hem3	LOC119586940
2.19494e-160	0.482912	0.981	0.834	3.37647e-156	Hem3	LOC119573181
2.30074e-152	0.569895	0.694	0.341	3.53923e-148	Hem3	LOC119580149
3.71151e-151	0.569042	0.902	0.598	5.70942e-147	Hem3	LOC119582346
2.18369e-141	0.745458	1	0.913	3.35918e-137	Hem3	LOC119598297
1.27447e-138	0.556634	0.491	0.216	1.96052e-134	Hem3	LOC119574490
1.84349e-135	0.458504	0.971	0.894	2.83584e-131	Hem3	LOC119569255
9.39739e-125	0.509022	0.574	0.285	1.4456e-120	Hem3	LOC119581697
3.78258e-123	0.534626	0.511	0.247	5.81875e-119	Hem3	LOC119570171
4.75604e-123	0.535679	0.849	0.574	7.31622e-119	Hem3	LOC119576114
5.13927e-120	0.489464	0.878	0.639	7.90573e-116	Hem3	LOC119573178
4.92569e-118	0.462872	0.777	0.494	7.57718e-114	Hem3	LOC119572874
7.80405e-118	0.330343	0.198	0.049	1.2005e-113	Hem3	LOC119578393
3.27835e-116	0.366541	0.999	0.895	5.04308e-112	Hem3	LOC119568359
4.26497e-116	0.924557	0.984	0.928	6.56081e-112	Hem3	LOC119590026
1.93762e-113	0.399236	0.77	0.479	2.98064e-109	Hem3	LOC119576178
2.23283e-106	0.385656	0.168	0.039	3.43476e-102	Hem3	LOC119596915
3.7416e-92	0.371107	0.721	0.437	5.75571e-88	Hem3	LOC119585247
4.48691e-88	0.402282	0.981	0.925	6.90221e-84	Hem3	LOC119588723
2.18299e-87	0.410948	0.837	0.618	3.35809e-83	Hem3	LOC119579496
1.69081e-86	0.370233	0.532	0.288	2.60097e-82	Hem3	LOC119594027
8.1797e-82	0.857188	0.652	0.505	1.25828e-77	Hem3	LOC119592659
4.01611e-79	0.360278	0.234	0.088	6.17798e-75	Hem3	LOC119576102
4.76578e-79	0.292287	0.247	0.094	7.3312e-75	Hem3	LOC119578802
2.01992e-77	0.372929	0.983	0.867	3.10724e-73	Hem3	LOC119594155
2.24878e-73	0.319503	0.453	0.239	3.45929e-69	Hem3	LOC119570481
4.16747e-73	0.424203	0.85	0.657	6.41081e-69	Hem3	LOC119586396
1.37212e-69	0.324621	0.34	0.162	2.11073e-65	Hem3	LOC119575133
2.52617e-69	0.250465	0.641	0.397	3.886e-65	Hem3	LOC119575316
4.02912e-69	0.313688	0.805	0.58	6.19799e-65	Hem3	LOC119595020
1.47079e-67	0.341693	0.832	0.603	2.26251e-63	Hem3	LOC119574331
2.26879e-65	0.318146	0.338	0.166	3.49008e-61	Hem3	LOC119576049
3.20609e-62	0.338765	0.578	0.366	4.93192e-58	Hem3	LOC119582733
6.20155e-56	0.288592	0.417	0.233	9.53985e-52	Hem3	LOC119595079
6.93532e-56	0.423101	0.745	0.574	1.06686e-51	Hem3	LOC119578724
1.2848e-53	0.258877	0.428	0.246	1.97641e-49	Hem3	LOC119590018
4.25251e-50	0.254423	0.363	0.205	6.54164e-46	Hem3	LOC119577556
1.13212e-48	0.596322	0.615	0.463	1.74154e-44	Hem3	LOC119590670
1.2132e-46	0.304978	0.78	0.59	1.86626e-42	Hem3	LOC119577148
8.94184e-45	0.276299	0.62	0.423	1.37552e-40	Hem3	LOC119594247
8.40711e-43	0.352575	0.581	0.406	1.29327e-38	Hem3	LOC119576724
1.18736e-41	0.262919	0.461	0.296	1.82651e-37	Hem3	LOC119575015
6.87351e-41	0.25418	0.917	0.787	1.05735e-36	Hem3	LOC119595823
7.12734e-40	0.294871	0.555	0.382	1.0964e-35	Hem3	LOC119594249
9.32482e-38	0.272239	0.424	0.268	1.43444e-33	Hem3	LOC119579485
1.07866e-35	0.370385	0.738	0.61	1.65931e-31	Hem3	LOC119597623
2.05962e-34	0.290465	0.134	0.058	3.16831e-30	Hem3	LOC119580847
1.36275e-32	0.250051	0.768	0.604	2.09632e-28	Hem3	LOC119597745
9.00378e-26	0.260532	0.36	0.245	1.38505e-21	Hem3	LOC119594740
4.23335e-14	0.250751	0.262	0.187	6.51216e-10	Hem3	LOC119597875
8.08986e-14	1.37601	0.114	0.068	1.24446e-09	Hem3	LOC119575802
2.80596e-11	0.285719	0.378	0.309	4.31641e-07	Hem3	LOC119575023
0	7.29377	0.776	0.05	0	Hem4	LOC119568402
0	5.47523	0.999	0.109	0	Hem4	LOC119568446
0	4.88409	0.97	0.095	0	Hem4	LOC119590523
0	4.71076	0.231	0.008	0	Hem4	LOC119575833
0	4.07449	0.799	0.146	0	Hem4	LOC119594995
0	3.80669	0.6	0.028	0	Hem4	LOC119595798
0	3.64417	0.662	0.019	0	Hem4	LOC119589099
0	3.35352	0.971	0.182	0	Hem4	LOC119586939
0	3.33698	0.948	0.094	0	Hem4	LOC119593861
0	3.26436	0.842	0.179	0	Hem4	LOC119585568
0	3.2083	0.983	0.233	0	Hem4	LOC119596883
0	3.19383	0.996	0.234	0	Hem4	LOC119568039
0	2.83447	0.761	0.105	0	Hem4	LOC119589993
0	2.80989	0.997	0.208	0	Hem4	LOC119594996
0	2.79972	0.994	0.598	0	Hem4	LOC119596884
0	2.5066	0.265	0.005	0	Hem4	LOC119580005
0	2.44614	0.999	0.354	0	Hem4	LOC119580256
0	2.32679	0.776	0.086	0	Hem4	LOC119596737
0	2.25104	0.907	0.3	0	Hem4	LOC119597527
0	2.20808	0.951	0.377	0	Hem4	LOC119595715
0	2.1477	0.924	0.464	0	Hem4	LOC119573100
0	2.13174	0.174	0.003	0	Hem4	LOC119576431
0	2.10545	0.695	0.072	0	Hem4	LOC119586715
0	2.07652	0.316	0.022	0	Hem4	LOC119594998
0	2.03222	0.973	0.443	0	Hem4	LOC119576449
0	2.02373	0.922	0.3	0	Hem4	LOC119597846
0	2.01379	0.822	0.35	0	Hem4	LOC119580360
0	2.00715	0.643	0.06	0	Hem4	LOC119590819
0	1.98787	0.997	0.579	0	Hem4	LOC119595716
0	1.9194	0.924	0.308	0	Hem4	LOC119580149
0	1.90113	0.197	0.002	0	Hem4	LOC119568322
0	1.88244	0.516	0.088	0	Hem4	LOC119599270
0	1.85406	0.561	0.055	0	Hem4	LOC119572228
0	1.81395	0.897	0.462	0	Hem4	LOC119576178
0	1.71197	0.561	0.079	0	Hem4	LOC119581031
0	1.62111	0.75	0.259	0	Hem4	LOC119581697
0	1.59733	0.436	0.046	0	Hem4	LOC119575708
0	1.59544	0.547	0.056	0	Hem4	LOC119592746
0	1.58756	0.847	0.498	0	Hem4	LOC119576939
0	1.58359	0.605	0.168	0	Hem4	LOC119596189
0	1.5694	0.338	0.037	0	Hem4	LOC119594632
0	1.54451	0.496	0.081	0	Hem4	LOC119577779
0	1.50253	0.983	0.714	0	Hem4	LOC119598351
0	1.34605	0.784	0.38	0	Hem4	LOC119580231
0	1.33115	0.534	0.118	0	Hem4	LOC119574696
0	1.30209	0.32	0.008	0	Hem4	LOC119573908
0	1.27988	0.683	0.201	0	Hem4	LOC119588935
0	1.24943	0.401	0.056	0	Hem4	LOC119579966
0	1.17069	0.26	0.026	0	Hem4	LOC119589276
0	0.99509	0.994	0.551	0	Hem4	LOC119580218
0	0.945009	0.27	0.011	0	Hem4	LOC119598110
0	0.908464	0.215	0.016	0	Hem4	LOC119593645
0	0.899539	0.331	0.036	0	Hem4	LOC119579396
0	0.688324	0.215	0.015	0	Hem4	LOC119580147
1.42718e-306	0.680695	0.878	0.394	2.19543e-302	Hem4	LOC119590513
3.61782e-302	1.09031	0.376	0.08	5.5653e-298	Hem4	LOC119573099
1.40046e-295	1.01331	0.412	0.102	2.15433e-291	Hem4	LOC119573113
6.39238e-295	1.10754	0.828	0.472	9.8334e-291	Hem4	LOC119597786
5.6812e-285	1.19558	0.826	0.462	8.73939e-281	Hem4	LOC119580006
9.00418e-280	1.30842	0.875	0.598	1.38511e-275	Hem4	LOC119574331
7.6299e-272	1.23515	0.865	0.616	1.17371e-267	Hem4	LOC119579496
6.73949e-266	0.848718	0.273	0.043	1.03674e-261	Hem4	LOC119595550
7.9746e-265	1.31874	0.633	0.275	1.22673e-260	Hem4	LOC119594027
8.71881e-265	0.558398	0.187	0.016	1.34121e-260	Hem4	LOC119588788
6.11182e-261	1.15995	0.824	0.526	9.40181e-257	Hem4	LOC119580811
8.31527e-260	0.738275	0.145	0.006	1.27914e-255	Hem4	LOC119577880
3.22611e-255	1.08429	0.997	0.753	4.96273e-251	Hem4	LOC119574873
2.06801e-253	1.12394	0.559	0.224	3.18122e-249	Hem4	LOC119570481
1.98416e-243	1.17823	0.702	0.39	3.05224e-239	Hem4	LOC119575316
3.01478e-238	1.09834	0.629	0.247	4.63764e-234	Hem4	LOC119586475
1.9236e-237	0.725307	0.173	0.015	2.95908e-233	Hem4	LOC119568381
4.63996e-236	0.889338	0.89	0.525	7.13765e-232	Hem4	LOC119596858
1.63005e-230	0.935173	0.953	0.84	2.5075e-226	Hem4	LOC119573181
6.49122e-229	1.14957	0.561	0.227	9.98544e-225	Hem4	LOC119580156
1.84956e-227	1.06927	0.744	0.437	2.84517e-223	Hem4	LOC119585247
9.22198e-221	0.550646	0.159	0.014	1.41862e-216	Hem4	LOC119592434
1.59659e-217	0.586418	0.181	0.02	2.45603e-213	Hem4	LOC119577100
3.48539e-216	1.22627	0.964	0.936	5.36158e-212	Hem4	LOC119573118
3.69603e-215	0.922345	0.239	0.04	5.6856e-211	Hem4	LOC119581051
1.027e-212	0.914365	0.516	0.207	1.57983e-208	Hem4	LOC119599375
1.95331e-205	0.87114	0.201	0.028	3.00478e-201	Hem4	LOC119577945
8.91865e-197	1.08685	0.499	0.198	1.37196e-192	Hem4	LOC119585669
1.88118e-192	0.684314	0.255	0.054	2.89382e-188	Hem4	LOC119597538
7.38427e-192	1.32612	0.866	0.608	1.13592e-187	Hem4	LOC119582346
4.89735e-191	0.629497	0.195	0.03	7.53359e-187	Hem4	LOC119581615
2.62912e-189	0.92502	0.759	0.5	4.04437e-185	Hem4	LOC119572874
8.95792e-187	0.597957	0.224	0.041	1.378e-182	Hem4	LOC119584321
8.98872e-187	0.798109	0.107	0.005	1.38273e-182	Hem4	LOC119568401
2.39176e-182	0.837414	0.531	0.233	3.67924e-178	Hem4	LOC119592048
3.47895e-179	0.74178	0.264	0.062	5.35167e-175	Hem4	LOC119596982
2.73706e-178	1.26605	0.524	0.253	4.21042e-174	Hem4	LOC119577163
7.57082e-178	0.45867	0.132	0.012	1.16462e-173	Hem4	LOC119575469
1.58069e-177	0.449617	0.119	0.008	2.43158e-173	Hem4	LOC119580375
1.69563e-177	0.718675	0.245	0.053	2.60839e-173	Hem4	LOC119592395
1.13018e-174	0.931234	0.578	0.292	1.73856e-170	Hem4	LOC119586295
8.14696e-173	0.927081	0.337	0.106	1.25325e-168	Hem4	LOC119585694
1.64034e-172	0.833715	0.202	0.036	2.52334e-168	Hem4	LOC119596915
2.53672e-171	0.83451	0.362	0.123	3.90223e-167	Hem4	LOC119596162
2.85185e-170	0.293421	0.1	0.005	4.387e-166	Hem4	LOC119585837
1.2287e-167	0.687723	0.351	0.114	1.89011e-163	Hem4	LOC119577951
1.222e-162	0.569999	0.183	0.031	1.8798e-158	Hem4	LOC119590020
1.08659e-154	0.450957	0.13	0.014	1.67151e-150	Hem4	LOC119586707
1.12744e-153	2.27364	0.542	0.263	1.73434e-149	Hem4	LOC119576448
1.53548e-150	0.828721	0.638	0.367	2.36204e-146	Hem4	LOC119589787
6.0387e-150	0.930525	0.865	0.711	9.28933e-146	Hem4	LOC119581392
8.66505e-149	0.707962	0.28	0.08	1.33294e-144	Hem4	LOC119575145
3.2719e-148	0.581192	0.185	0.036	5.03316e-144	Hem4	LOC119577822
5.00172e-148	0.331915	0.106	0.009	7.69414e-144	Hem4	LOC119592951
3.38903e-147	1.07902	0.639	0.399	5.21335e-143	Hem4	LOC119576724
4.48498e-142	1.0347	0.595	0.36	6.89925e-138	Hem4	LOC119577032
2.4507e-140	1.05373	0.59	0.339	3.76992e-136	Hem4	LOC119582904
6.56882e-139	0.749386	0.399	0.153	1.01048e-134	Hem4	LOC119586940
9.47373e-137	0.862586	0.66	0.425	1.45734e-132	Hem4	LOC119598905
1.57691e-136	1.5248	0.76	0.511	2.42576e-132	Hem4	LOC119579036
2.3396e-132	0.545395	0.166	0.031	3.599e-128	Hem4	LOC119596118
1.19216e-125	0.976184	0.777	0.632	1.83389e-121	Hem4	LOC119580308
5.68246e-123	1.24162	0.657	0.472	8.74133e-119	Hem4	LOC119596827
1.55677e-121	0.900484	0.578	0.35	2.39478e-117	Hem4	LOC119590845
1.38759e-119	0.779382	0.472	0.244	2.13452e-115	Hem4	LOC119589482
1.93633e-117	0.872196	0.321	0.125	2.97865e-113	Hem4	LOC119578739
2.34388e-117	0.445891	0.792	0.484	3.60559e-113	Hem4	LOC119592659
1.30691e-116	0.417773	0.111	0.015	2.01043e-112	Hem4	LOC119572384
5.81218e-116	0.534298	0.193	0.049	8.94087e-112	Hem4	LOC119587930
3.52696e-112	0.800984	0.444	0.231	5.42552e-108	Hem4	LOC119597867
3.15351e-103	0.779621	0.488	0.286	4.85104e-99	Hem4	LOC119581611
2.41872e-102	0.782354	0.44	0.23	3.72071e-98	Hem4	LOC119586816
3.16045e-102	0.521245	0.266	0.095	4.86172e-98	Hem4	LOC119575246
1.93513e-101	0.696694	0.104	0.015	2.97681e-97	Hem4	LOC119596881
4.19601e-101	0.777234	0.519	0.31	6.45473e-97	Hem4	LOC119568934
2.82788e-99	0.521159	0.169	0.043	4.35013e-95	Hem4	LOC119597771
4.78317e-99	0.745125	0.469	0.268	7.35794e-95	Hem4	LOC119586305
1.08956e-98	0.511755	0.205	0.062	1.67606e-94	Hem4	LOC119589038
1.17678e-98	0.471947	0.176	0.047	1.81023e-94	Hem4	LOC119599362
2.46687e-97	0.45728	0.958	0.946	3.79478e-93	Hem4	LOC119574556
1.82038e-94	0.676595	0.772	0.59	2.80028e-90	Hem4	LOC119576114
3.66942e-93	0.907356	0.763	0.622	5.64467e-89	Hem4	LOC119581157
4.31845e-91	0.555151	0.172	0.048	6.64307e-87	Hem4	LOC119573254
1.9476e-90	0.573966	0.252	0.097	2.996e-86	Hem4	LOC119570990
3.25199e-90	0.677746	0.345	0.163	5.00254e-86	Hem4	LOC119574911
3.97838e-87	0.50986	0.182	0.055	6.11995e-83	Hem4	LOC119586461
5.42938e-87	0.458412	0.168	0.048	8.35201e-83	Hem4	LOC119576999
3.39155e-84	0.456589	0.179	0.055	5.21722e-80	Hem4	LOC119589874
1.19937e-83	0.528684	0.286	0.124	1.84499e-79	Hem4	LOC119584567
6.15616e-83	0.587889	0.136	0.034	9.47002e-79	Hem4	LOC119576274
3.64192e-78	0.444409	0.127	0.03	5.60237e-74	Hem4	LOC119579037
8.27549e-76	0.656121	0.423	0.249	1.27302e-71	Hem4	LOC119585246
2.04664e-75	0.869392	0.575	0.414	3.14835e-71	Hem4	LOC119597643
2.31602e-75	0.496669	0.998	0.896	3.56273e-71	Hem4	LOC119568359
2.44828e-73	0.374549	0.106	0.023	3.76619e-69	Hem4	LOC119587112
9.82743e-72	0.539417	0.299	0.14	1.51175e-67	Hem4	LOC119594094
2.47783e-71	0.359796	0.142	0.04	3.81164e-67	Hem4	LOC119588391
8.05449e-71	0.614725	0.728	0.538	1.23902e-66	Hem4	LOC119568966
6.71425e-69	0.617713	0.776	0.659	1.03285e-64	Hem4	LOC119573178
5.67659e-68	0.596247	0.845	0.75	8.7323e-64	Hem4	LOC119597884
8.11179e-68	0.859844	0.111	0.026	1.24784e-63	Hem4	LOC119579238
1.50922e-67	0.485118	0.97	0.895	2.32164e-63	Hem4	LOC119577126
2.69395e-65	0.662728	0.303	0.158	4.1441e-61	Hem4	LOC119596898
4.98449e-65	0.5798	0.274	0.132	7.66764e-61	Hem4	LOC119574086
6.61301e-64	0.283991	0.1	0.023	1.01728e-59	Hem4	LOC119592486
6.98502e-61	0.587671	0.486	0.328	1.0745e-56	Hem4	LOC119569369
1.07208e-60	0.490057	0.156	0.054	1.64918e-56	Hem4	LOC119577164
3.58871e-59	0.325061	0.974	0.777	5.52052e-55	Hem4	LOC119583573
5.02583e-58	0.617541	0.244	0.117	7.73123e-54	Hem4	LOC119586792
6.21194e-58	0.689071	0.369	0.225	9.55583e-54	Hem4	LOC119580127
1.86648e-56	0.762614	0.394	0.253	2.87121e-52	Hem4	LOC119590018
4.75467e-56	0.540056	0.794	0.696	7.31411e-52	Hem4	LOC119574446
5.54645e-55	0.338585	0.104	0.029	8.53211e-51	Hem4	LOC119590065
5.06339e-53	0.433139	0.664	0.492	7.78902e-49	Hem4	LOC119588769
1.35355e-52	0.504831	0.414	0.266	2.08217e-48	Hem4	LOC119570171
5.24158e-52	0.597085	0.431	0.294	8.06312e-48	Hem4	LOC119583953
6.63231e-52	0.475381	0.19	0.081	1.02025e-47	Hem4	LOC119588761
1.08517e-51	0.438102	0.876	0.813	1.66932e-47	Hem4	LOC119588664
3.78478e-51	0.460065	0.562	0.372	5.82212e-47	Hem4	LOC119590501
3.03874e-49	0.59146	0.437	0.3	4.6745e-45	Hem4	LOC119575364
2.18173e-48	0.276838	0.112	0.035	3.35615e-44	Hem4	LOC119593023
3.08187e-48	0.581765	0.44	0.307	4.74084e-44	Hem4	LOC119574647
1.13725e-46	0.343095	0.425	0.269	1.74944e-42	Hem4	LOC119588772
1.56042e-45	0.531611	0.388	0.255	2.4004e-41	Hem4	LOC119573272
2.87554e-42	0.530672	0.495	0.372	4.42344e-38	Hem4	LOC119573080
1.02436e-41	0.533375	0.303	0.187	1.57577e-37	Hem4	LOC119581950
1.37884e-40	0.296585	0.997	0.97	2.12107e-36	Hem4	LOC119585720
2.28371e-40	0.466675	0.314	0.194	3.51302e-36	Hem4	LOC119580034
2.71001e-40	0.50213	0.593	0.477	4.1688e-36	Hem4	LOC119574214
2.97267e-40	0.582116	0.325	0.208	4.57286e-36	Hem4	LOC119573267
4.81747e-40	0.483484	0.347	0.226	7.41071e-36	Hem4	LOC119583563
5.72075e-40	0.554504	0.302	0.189	8.80024e-36	Hem4	LOC119573268
5.74315e-40	0.341498	0.13	0.052	8.83469e-36	Hem4	LOC119595033
5.99946e-39	0.32128	0.144	0.061	9.22897e-35	Hem4	LOC119576450
1.57077e-38	0.79696	0.917	0.856	2.41632e-34	Hem4	LOC119572398
3.10176e-38	0.525945	0.416	0.3	4.77143e-34	Hem4	LOC119589104
7.24418e-38	0.395539	0.275	0.166	1.11437e-33	Hem4	LOC119577019
7.22877e-37	0.480875	0.826	0.759	1.112e-32	Hem4	LOC119594561
1.13082e-36	0.504522	0.44	0.324	1.73954e-32	Hem4	LOC119576362
7.01423e-36	0.266813	0.125	0.051	1.079e-31	Hem4	LOC119573369
3.26524e-35	0.467044	0.288	0.18	5.02291e-31	Hem4	LOC119582674
1.27296e-33	0.493918	0.551	0.455	1.9582e-29	Hem4	LOC119576306
1.50859e-32	0.490805	0.517	0.407	2.32067e-28	Hem4	LOC119585870
1.98022e-32	0.34111	0.126	0.054	3.04617e-28	Hem4	LOC119586352
4.038e-32	0.358474	0.233	0.136	6.21165e-28	Hem4	LOC119592057
6.56809e-31	0.414351	0.043	0.143	1.01037e-26	Hem4	LOC119592600
1.17808e-30	0.419325	0.328	0.224	1.81225e-26	Hem4	LOC119576788
1.46683e-29	0.436411	0.684	0.606	2.25643e-25	Hem4	LOC119597591
3.9315e-29	0.368267	0.224	0.136	6.04783e-25	Hem4	LOC119572535
1.5718e-28	0.456303	0.159	0.083	2.4179e-24	Hem4	LOC119586971
1.69898e-28	0.474878	0.414	0.307	2.61354e-24	Hem4	LOC119594136
5.34877e-28	0.496459	0.302	0.206	8.22802e-24	Hem4	LOC119590611
2.08638e-27	0.427793	0.662	0.58	3.20948e-23	Hem4	LOC119593828
1.14458e-26	0.649817	0.691	0.597	1.76071e-22	Hem4	LOC119596927
2.03654e-26	0.340829	0.545	0.432	3.13281e-22	Hem4	LOC119572330
2.60679e-26	0.322018	0.153	0.079	4.01002e-22	Hem4	LOC119578832
3.28611e-26	0.351219	0.225	0.139	5.05502e-22	Hem4	LOC119575466
2.62401e-25	0.51865	0.721	0.671	4.03651e-21	Hem4	LOC119578684
3.39093e-25	0.402448	0.337	0.245	5.21627e-21	Hem4	LOC119576963
3.77855e-25	0.664366	0.252	0.169	5.81254e-21	Hem4	LOC119596032
2.85911e-24	0.460319	0.725	0.686	4.39816e-20	Hem4	LOC119578985
5.41772e-24	0.417172	0.365	0.276	8.33408e-20	Hem4	LOC119585703
8.81938e-24	0.304636	0.17	0.096	1.35668e-19	Hem4	LOC119588756
1.09355e-23	0.424284	0.344	0.254	1.6822e-19	Hem4	LOC119572369
2.4994e-23	0.424262	0.652	0.605	3.84482e-19	Hem4	LOC119596908
5.46271e-22	0.368534	0.381	0.301	8.40329e-18	Hem4	LOC119574895
1.09761e-21	0.269075	0.185	0.111	1.68845e-17	Hem4	LOC119593578
7.90319e-21	0.26777	0.169	0.099	1.21575e-16	Hem4	LOC119582210
3.09596e-20	0.301048	0.134	0.073	4.76252e-16	Hem4	LOC119573002
5.75502e-20	0.328312	0.337	0.252	8.85295e-16	Hem4	LOC119585174
8.31676e-20	0.376272	0.546	0.482	1.27937e-15	Hem4	LOC119588491
2.2294e-19	0.317529	0.241	0.162	3.42949e-15	Hem4	LOC119575221
2.84299e-19	0.277921	0.936	0.916	4.37337e-15	Hem4	LOC119583416
4.195e-18	0.256649	0.867	0.864	6.45317e-14	Hem4	LOC119594788
5.82598e-18	0.325537	0.635	0.592	8.96211e-14	Hem4	LOC119590066
3.02603e-17	0.318434	0.215	0.146	4.65494e-13	Hem4	LOC119580861
8.41864e-17	0.298279	0.977	0.971	1.29504e-12	Hem4	LOC119585805
1.42778e-16	0.265807	0.245	0.176	2.19635e-12	Hem4	LOC119583471
1.93112e-16	1.10413	0.588	0.538	2.97065e-12	Hem4	LOC119594451
5.64316e-16	0.256414	0.145	0.089	8.68088e-12	Hem4	LOC119577937
4.20294e-15	0.272526	0.253	0.182	6.46538e-11	Hem4	LOC119576049
4.65716e-15	0.250653	0.177	0.116	7.16411e-11	Hem4	LOC119579455
3.14969e-14	0.292824	0.317	0.252	4.84517e-10	Hem4	LOC119578861
8.6832e-14	0.334039	0.966	0.95	1.33574e-09	Hem4	LOC119594426
1.23256e-13	0.335499	0.325	0.264	1.89605e-09	Hem4	LOC119578095
2.81131e-12	0.279385	0.473	0.426	4.32464e-08	Hem4	LOC119597350
5.49807e-12	0.289349	0.534	0.484	8.45768e-08	Hem4	LOC119596946
1.39191e-11	0.302221	0.322	0.264	2.14117e-07	Hem4	LOC119576832
2.34483e-11	0.30345	0.24	0.185	3.60706e-07	Hem4	LOC119580307
2.7791e-11	0.301701	0.542	0.497	4.27508e-07	Hem4	LOC119583495
3.30762e-11	0.305293	0.255	0.201	5.08811e-07	Hem4	LOC119576363
3.74022e-11	0.330711	0.54	0.503	5.75358e-07	Hem4	LOC119581772
3.89641e-11	0.274905	0.159	0.113	5.99384e-07	Hem4	LOC119577988
9.48922e-11	0.331951	0.328	0.282	1.45973e-06	Hem4	LOC119597064
9.76126e-11	0.279133	0.236	0.183	1.50157e-06	Hem4	LOC119579486
1.29609e-10	0.362459	0.402	0.355	1.99377e-06	Hem4	LOC119594899
1.36147e-10	0.275074	0.621	0.592	2.09435e-06	Hem4	LOC119574954
3.84931e-10	0.381794	0.125	0.084	5.9214e-06	Hem4	LOC119574948
4.08228e-10	0.260335	0.371	0.321	6.27977e-06	Hem4	LOC119581771
1.42109e-09	0.395204	0.197	0.154	2.18606e-05	Hem4	LOC119579003
4.40895e-09	0.346196	0.499	0.461	6.78229e-05	Hem4	LOC119599033
5.88085e-09	0.275604	0.384	0.341	9.04652e-05	Hem4	LOC119577430
7.87985e-09	0.30269	0.251	0.208	0.000121216	Hem4	LOC119596479
1.10392e-08	0.251403	0.357	0.318	0.000169816	Hem4	LOC119574608
6.59269e-08	0.2927	0.352	0.314	0.00101415	Hem4	LOC119589156
1.02082e-07	0.323176	0.44	0.415	0.00157033	Hem4	LOC119586950
1.74007e-07	0.288127	0.232	0.188	0.00267675	Hem4	LOC119579179
3.40717e-07	0.284117	0.486	0.469	0.00524125	Hem4	LOC119580896
0	7.3233	0.875	0.026	0	Hem5	LOC119597758
0	6.19182	1	0.118	0	Hem5	LOC119590571
0	5.88626	0.937	0.038	0	Hem5	LOC119574958
0	4.165	0.665	0.086	0	Hem5	LOC119578798
0	4.05342	1	0.35	0	Hem5	LOC119573325
0	3.96632	0.777	0.019	0	Hem5	LOC119588027
0	3.80083	0.957	0.308	0	Hem5	LOC119585595
0	3.79392	0.73	0.013	0	Hem5	LOC119588028
0	3.69447	0.978	0.36	0	Hem5	LOC119578800
0	3.47839	0.709	0.016	0	Hem5	LOC119588241
0	2.85248	0.958	0.292	0	Hem5	LOC119598690
0	2.75815	0.654	0.053	0	Hem5	LOC119590598
0	2.61115	0.754	0.049	0	Hem5	LOC119596963
0	2.53614	0.751	0.021	0	Hem5	LOC119568985
0	2.51609	0.994	0.784	0	Hem5	LOC119598648
0	2.31271	1	0.859	0	Hem5	LOC119583831
0	2.22077	0.631	0.077	0	Hem5	LOC119577701
0	2.17411	0.295	0.009	0	Hem5	LOC119582058
0	2.17138	0.501	0.029	0	Hem5	LOC119598894
0	2.10849	0.713	0.128	0	Hem5	LOC119581212
0	2.03036	0.275	0.009	0	Hem5	LOC119584970
0	1.92747	0.62	0.093	0	Hem5	LOC119592886
0	1.87209	0.465	0.006	0	Hem5	LOC119588024
0	1.81559	0.28	0.001	0	Hem5	LOC119584255
0	1.6846	0.348	0.02	0	Hem5	LOC119587833
0	1.55873	0.417	0.027	0	Hem5	LOC119597284
0	1.52333	0.349	0.023	0	Hem5	LOC119577125
0	1.34951	0.303	0.018	0	Hem5	LOC119598259
0	0.850157	0.184	0.001	0	Hem5	LOC119579997
0	0.7778	0.243	0.005	0	Hem5	LOC119570944
0	0.649856	0.193	0.005	0	Hem5	LOC119590971
3.41514e-305	2.21087	0.828	0.259	5.25352e-301	Hem5	LOC119574328
2.48667e-284	3.10411	0.844	0.336	3.82524e-280	Hem5	LOC119586294
3.03203e-282	3.0189	0.972	0.666	4.66416e-278	Hem5	LOC119580121
2.98121e-277	1.99829	0.949	0.508	4.586e-273	Hem5	LOC119590722
3.46072e-267	1.17144	0.422	0.058	5.32363e-263	Hem5	LOC119590740
1.31414e-262	1.24152	0.173	0.006	2.02154e-258	Hem5	LOC119574295
6.09969e-255	2.0516	0.957	0.743	9.38315e-251	Hem5	LOC119577907
1.44473e-252	1.05601	1	0.985	2.22242e-248	Hem5	LOC119584010
4.56558e-244	1.53488	0.543	0.113	7.02323e-240	Hem5	LOC119577151
1.80515e-243	0.430547	0.124	0.002	2.77687e-239	Hem5	LOC119592053
4.80896e-242	2.74282	0.958	0.718	7.39762e-238	Hem5	LOC119580250
2.27808e-238	1.39637	0.988	0.959	3.50437e-234	Hem5	LOC119593854
8.37873e-237	1.65659	0.587	0.142	1.2889e-232	Hem5	LOC119576369
2.71664e-235	1.1454	0.306	0.032	4.17901e-231	Hem5	LOC119582828
1.80945e-230	0.8635	0.253	0.022	2.78348e-226	Hem5	LOC119594572
1.18994e-228	0.407599	0.102	0.001	1.83048e-224	Hem5	LOC119598902
1.46703e-223	0.756904	0.263	0.024	2.25673e-219	Hem5	LOC119597715
1.39779e-221	1.63957	0.796	0.326	2.15022e-217	Hem5	LOC119591322
3.65958e-219	1.67504	0.958	0.73	5.62953e-215	Hem5	LOC119578897
3.28755e-214	1.69216	0.745	0.282	5.05724e-210	Hem5	LOC119572450
9.44154e-207	0.836098	0.173	0.01	1.45239e-202	Hem5	LOC119599356
4.92268e-200	1.51903	0.175	0.011	7.57256e-196	Hem5	LOC119590124
2.25337e-197	1.10928	0.437	0.086	3.46636e-193	Hem5	LOC119581788
2.39473e-196	1.88547	0.611	0.186	3.68381e-192	Hem5	LOC119576346
3.38474e-195	2.44494	0.915	0.587	5.20675e-191	Hem5	LOC119589946
3.6077e-195	2.23956	0.989	0.715	5.54973e-191	Hem5	LOC119594820
3.35023e-188	0.878877	0.274	0.033	5.15366e-184	Hem5	LOC119590677
6.02091e-186	1.25785	0.985	0.901	9.26197e-182	Hem5	LOC119577126
1.12494e-178	1.62543	0.796	0.402	1.73049e-174	Hem5	LOC119590825
6.71283e-177	0.429625	0.1	0.002	1.03263e-172	Hem5	LOC119597431
8.68063e-168	1.58975	0.682	0.27	1.33534e-163	Hem5	LOC119588772
5.7068e-167	1.92963	0.954	0.844	8.77877e-163	Hem5	LOC119590855
3.13785e-162	1.68354	0.543	0.165	4.82695e-158	Hem5	LOC119585863
3.99886e-162	0.766857	0.244	0.03	6.15144e-158	Hem5	LOC119592120
1.07628e-161	1.20035	0.402	0.087	1.65563e-157	Hem5	LOC119574233
1.61514e-161	0.714914	0.199	0.019	2.48457e-157	Hem5	LOC119573244
2.43713e-160	0.496754	0.119	0.005	3.74904e-156	Hem5	LOC119579191
3.51381e-159	1.43526	0.59	0.2	5.40529e-155	Hem5	LOC119590611
1.35696e-158	1.47955	0.399	0.089	2.08741e-154	Hem5	LOC119589858
1.74626e-155	1.47294	0.777	0.38	2.68627e-151	Hem5	LOC119588608
5.20856e-153	0.89491	0.252	0.034	8.01232e-149	Hem5	LOC119576980
3.10042e-152	1.20959	0.501	0.145	4.76938e-148	Hem5	LOC119586348
8.95489e-152	1.61724	0.767	0.407	1.37753e-147	Hem5	LOC119574619
2.85031e-147	1.65957	0.951	0.566	4.38463e-143	Hem5	LOC119578000
1.2362e-146	1.75897	0.841	0.501	1.90165e-142	Hem5	LOC119589083
8.84757e-146	1.30853	0.529	0.161	1.36102e-141	Hem5	LOC119592137
4.65533e-145	1.60574	0.527	0.174	7.1613e-141	Hem5	LOC119587818
5.42781e-144	0.443084	0.141	0.01	8.3496e-140	Hem5	LOC119576203
7.17141e-144	1.009	0.41	0.099	1.10318e-139	Hem5	LOC119596221
1.46467e-140	1.40335	0.723	0.356	2.2531e-136	Hem5	LOC119581847
2.05558e-140	1.44174	0.287	0.049	3.1621e-136	Hem5	LOC119578796
1.55398e-134	0.987243	0.207	0.026	2.39049e-130	Hem5	LOC119585203
1.11013e-133	1.91672	0.447	0.13	1.70771e-129	Hem5	LOC119583699
1.04807e-129	1.14893	0.946	0.873	1.61224e-125	Hem5	LOC119592721
1.19804e-128	1.05855	0.498	0.163	1.84295e-124	Hem5	LOC119596901
7.47552e-128	1.40522	0.689	0.332	1.14996e-123	Hem5	LOC119569369
9.10234e-128	1.31868	0.287	0.053	1.40021e-123	Hem5	LOC119587694
1.77042e-127	1.10346	0.968	0.787	2.72344e-123	Hem5	LOC119580803
3.09599e-124	0.879541	0.981	0.954	4.76256e-120	Hem5	LOC119576960
1.96537e-123	2.0684	0.263	0.045	3.02332e-119	Hem5	LOC119594953
3.84918e-123	1.37754	0.417	0.121	5.92119e-119	Hem5	LOC119577877
1.09509e-121	1.29872	0.332	0.077	1.68458e-117	Hem5	LOC119590723
7.81371e-120	1.11028	0.382	0.1	1.20198e-115	Hem5	LOC119596532
2.91988e-119	1.33074	0.493	0.163	4.49164e-115	Hem5	LOC119575164
5.13705e-119	0.632863	1	0.999	7.90232e-115	Hem5	LOC119572042
1.84942e-118	1.70506	0.456	0.149	2.84496e-114	Hem5	LOC119574482
6.04688e-116	2.00095	0.518	0.171	9.30192e-112	Hem5	LOC119584187
3.72528e-115	1.36387	0.612	0.27	5.73059e-111	Hem5	LOC119590703
1.55804e-114	1.18301	0.767	0.431	2.39673e-110	Hem5	LOC119572330
5.00852e-114	0.934736	0.253	0.047	7.70461e-110	Hem5	LOC119569676
5.43426e-113	0.889704	0.342	0.085	8.35952e-109	Hem5	LOC119589515
5.67625e-112	1.11491	0.773	0.463	8.73178e-108	Hem5	LOC119583834
3.40113e-111	1.10787	0.547	0.219	5.23196e-107	Hem5	LOC119574938
4.66916e-111	1.18498	0.849	0.61	7.18258e-107	Hem5	LOC119597927
1.57453e-110	1.16995	0.686	0.362	2.4221e-106	Hem5	LOC119581616
6.28237e-110	0.617115	0.136	0.013	9.66417e-106	Hem5	LOC119580860
7.83698e-110	0.629038	0.192	0.027	1.20556e-105	Hem5	LOC119596965
1.00672e-108	1.38226	0.286	0.062	1.54864e-104	Hem5	LOC119599023
1.05011e-108	1.23401	0.751	0.45	1.61538e-104	Hem5	LOC119596914
6.98933e-108	1.27079	0.629	0.296	1.07517e-103	Hem5	LOC119593775
2.55973e-106	0.649229	0.233	0.042	3.93763e-102	Hem5	LOC119572494
4.82667e-106	0.898496	0.968	0.953	7.42487e-102	Hem5	LOC119576393
9.53751e-106	1.1701	0.743	0.438	1.46715e-101	Hem5	LOC119583052
2.53459e-105	1.48005	0.583	0.246	3.89895e-101	Hem5	LOC119581695
1.24597e-104	1.26633	0.521	0.206	1.91667e-100	Hem5	LOC119575387
3.55947e-104	1.14251	0.864	0.655	5.47553e-100	Hem5	LOC119583654
1.61416e-101	0.997537	0.974	0.851	2.48306e-97	Hem5	LOC119594945
2.89654e-101	1.86179	0.711	0.465	4.45574e-97	Hem5	LOC119569537
6.55022e-101	1.39062	0.733	0.439	1.00762e-96	Hem5	LOC119576112
4.71665e-100	1.34542	0.773	0.503	7.25562e-96	Hem5	LOC119588769
1.19482e-99	1.03508	0.802	0.544	1.83799e-95	Hem5	LOC119588465
1.75583e-98	1.37733	0.434	0.151	2.70099e-94	Hem5	LOC119583844
1.26662e-97	2.10608	0.808	0.595	1.94844e-93	Hem5	LOC119597414
5.31125e-97	1.1961	0.195	0.032	8.17029e-93	Hem5	LOC119580008
2.25994e-96	0.978744	0.955	0.801	3.47647e-92	Hem5	LOC119594980
3.74066e-96	1.14649	0.403	0.132	5.75426e-92	Hem5	LOC119597656
6.43944e-96	1.29269	0.77	0.545	9.90578e-92	Hem5	LOC119576219
3.27981e-95	0.698022	0.213	0.038	5.04533e-91	Hem5	LOC119598132
3.66347e-94	0.856612	0.323	0.087	5.63552e-90	Hem5	LOC119585185
5.33817e-94	1.3728	0.713	0.354	8.21171e-90	Hem5	LOC119584357
1.86087e-93	1.01214	0.343	0.1	2.86258e-89	Hem5	LOC119582071
5.68707e-93	0.499049	0.165	0.024	8.74843e-89	Hem5	LOC119588688
2.0117e-91	0.953171	0.955	0.855	3.0946e-87	Hem5	LOC119593982
2.37252e-91	1.03956	0.354	0.108	3.64965e-87	Hem5	LOC119598170
1.77664e-90	0.750853	0.989	0.953	2.733e-86	Hem5	LOC119583808
2.32333e-90	1.04178	0.648	0.297	3.57398e-86	Hem5	LOC119584358
8.96327e-88	0.485517	0.164	0.025	1.37882e-83	Hem5	LOC119598896
1.66733e-87	1.03911	0.598	0.305	2.56485e-83	Hem5	LOC119590078
8.70282e-87	1.03056	0.617	0.324	1.33875e-82	Hem5	LOC119568061
1.92091e-86	1.0338	0.611	0.313	2.95493e-82	Hem5	LOC119578686
1.20737e-85	0.969016	0.932	0.819	1.85729e-81	Hem5	LOC119586194
3.99912e-85	1.14023	0.461	0.185	6.15184e-81	Hem5	LOC119584795
6.48253e-84	1.01771	0.708	0.458	9.97208e-80	Hem5	LOC119599457
8.38784e-84	0.783417	0.244	0.057	1.2903e-79	Hem5	LOC119587718
8.6829e-84	0.941471	0.274	0.071	1.33569e-79	Hem5	LOC119575413
7.88746e-83	1.03524	0.572	0.285	1.21333e-78	Hem5	LOC119587828
2.4822e-82	0.382257	0.125	0.015	3.81837e-78	Hem5	LOC119595123
9.41476e-82	1.53739	0.7	0.455	1.44827e-77	Hem5	LOC119582797
1.77107e-81	0.783226	0.944	0.854	2.72444e-77	Hem5	LOC119584989
3.05412e-81	0.653931	0.224	0.049	4.69815e-77	Hem5	LOC119568048
9.17511e-81	0.722266	0.23	0.052	1.41141e-76	Hem5	LOC119598743
2.22169e-80	0.926535	0.286	0.076	3.41763e-76	Hem5	LOC119573240
2.69573e-80	0.644645	0.185	0.034	4.14683e-76	Hem5	LOC119579366
3.7772e-80	1.15419	0.444	0.182	5.81046e-76	Hem5	LOC119578982
1.64807e-78	1.08468	0.566	0.284	2.53522e-74	Hem5	LOC119593833
5.06948e-78	1.03817	0.21	0.046	7.79838e-74	Hem5	LOC119592493
8.94771e-78	0.50899	0.184	0.035	1.37643e-73	Hem5	LOC119597357
4.5996e-77	0.707337	0.964	0.903	7.07557e-73	Hem5	LOC119586307
6.58323e-77	0.942087	0.991	0.9	1.0127e-72	Hem5	LOC119572332
9.10127e-77	0.874038	0.326	0.103	1.40005e-72	Hem5	LOC119594056
1.10474e-76	1.08848	0.884	0.752	1.69942e-72	Hem5	LOC119574593
1.22234e-76	0.984761	0.66	0.404	1.88033e-72	Hem5	LOC119598724
1.95871e-76	0.908323	0.442	0.18	3.01309e-72	Hem5	LOC119590072
6.10737e-76	0.783337	0.425	0.164	9.39496e-72	Hem5	LOC119583902
4.38358e-75	1.01879	0.553	0.289	6.74325e-71	Hem5	LOC119598958
7.21851e-75	0.562758	0.136	0.02	1.11042e-70	Hem5	LOC119582524
1.95521e-74	1.23503	0.734	0.462	3.00769e-70	Hem5	LOC119584197
1.21883e-73	0.774955	0.966	0.859	1.87493e-69	Hem5	LOC119572398
5.24432e-73	1.0814	0.802	0.624	8.06733e-69	Hem5	LOC119593954
1.40078e-71	0.92381	0.862	0.731	2.15482e-67	Hem5	LOC119576930
1.69739e-71	0.93705	0.81	0.604	2.61109e-67	Hem5	LOC119581000
1.80848e-71	0.671882	0.25	0.067	2.78199e-67	Hem5	LOC119585640
6.06967e-69	0.750873	0.238	0.063	9.33697e-65	Hem5	LOC119573719
1.06806e-68	1.00879	0.615	0.358	1.64299e-64	Hem5	LOC119575903
2.4335e-68	0.741454	0.92	0.805	3.74345e-64	Hem5	LOC119590667
4.49943e-68	0.893088	0.773	0.602	6.92147e-64	Hem5	LOC119580875
7.22544e-68	0.688875	0.255	0.072	1.11149e-63	Hem5	LOC119575378
8.07564e-68	0.694342	0.263	0.077	1.24228e-63	Hem5	LOC119589089
2.3864e-67	0.776903	0.439	0.193	3.671e-63	Hem5	LOC119591531
6.81777e-67	0.927993	0.833	0.687	1.04878e-62	Hem5	LOC119597319
8.435e-66	0.881563	0.909	0.82	1.29756e-61	Hem5	LOC119580092
8.70667e-66	0.966877	0.603	0.359	1.33935e-61	Hem5	LOC119592143
1.3262e-65	0.558567	0.206	0.049	2.04009e-61	Hem5	LOC119591730
1.4313e-65	1.03017	0.504	0.253	2.20177e-61	Hem5	LOC119596928
1.80398e-65	0.598001	0.206	0.049	2.77507e-61	Hem5	LOC119589729
3.27065e-65	0.450417	0.159	0.031	5.03125e-61	Hem5	LOC119583062
3.30059e-65	1.23085	0.638	0.413	5.0773e-61	Hem5	LOC119578746
7.4718e-65	0.578969	0.187	0.042	1.14939e-60	Hem5	LOC119585862
8.57994e-65	0.504393	0.136	0.023	1.31985e-60	Hem5	LOC119592482
1.68849e-64	1.07621	0.776	0.566	2.59741e-60	Hem5	LOC119596573
1.80832e-64	0.602451	0.15	0.028	2.78174e-60	Hem5	LOC119592362
3.06844e-64	0.594028	0.204	0.049	4.72018e-60	Hem5	LOC119573324
5.42147e-64	1.0216	0.598	0.33	8.33984e-60	Hem5	LOC119571124
3.01566e-63	0.913808	0.323	0.115	4.639e-59	Hem5	LOC119582875
4.99501e-63	0.439264	0.133	0.023	7.68383e-59	Hem5	LOC119592636
8.06933e-63	1.13447	0.717	0.494	1.24131e-58	Hem5	LOC119585167
4.22861e-62	0.338122	0.107	0.015	6.50487e-58	Hem5	LOC119570837
9.58918e-62	0.471926	0.142	0.026	1.4751e-57	Hem5	LOC119582558
1.29104e-61	0.393419	0.131	0.022	1.98601e-57	Hem5	LOC119585613
2.03045e-61	0.94338	0.787	0.632	3.12345e-57	Hem5	LOC119589934
2.10842e-61	1.07619	0.326	0.122	3.24339e-57	Hem5	LOC119591787
4.53323e-61	1.13306	0.652	0.424	6.97346e-57	Hem5	LOC119597057
3.87331e-59	0.857449	0.889	0.762	5.95832e-55	Hem5	LOC119575025
4.85613e-59	0.394974	0.105	0.015	7.47018e-55	Hem5	LOC119582622
5.51097e-59	0.89073	0.624	0.403	8.47753e-55	Hem5	LOC119594274
1.0823e-58	0.798983	0.815	0.652	1.6649e-54	Hem5	LOC119574145
2.82019e-57	1.28456	0.702	0.513	4.3383e-53	Hem5	LOC119574941
3.15755e-57	0.738662	0.32	0.12	4.85726e-53	Hem5	LOC119578465
1.00375e-56	0.833979	0.597	0.371	1.54406e-52	Hem5	LOC119574968
1.12274e-56	0.425326	1	0.971	1.72711e-52	Hem5	LOC119568671
4.06309e-56	0.803426	0.736	0.543	6.25025e-52	Hem5	LOC119582556
7.07306e-56	0.891349	0.59	0.359	1.08805e-51	Hem5	LOC119576243
9.56282e-56	0.93457	0.926	0.793	1.47105e-51	Hem5	LOC119597587
1.10868e-55	0.650368	0.907	0.785	1.70548e-51	Hem5	LOC119580126
1.27206e-55	0.72772	0.323	0.126	1.95682e-51	Hem5	LOC119586192
2.16853e-55	1.3159	0.488	0.245	3.33584e-51	Hem5	LOC119582772
5.55059e-55	0.705754	0.883	0.825	8.53848e-51	Hem5	LOC119575417
7.78179e-55	0.810155	0.771	0.553	1.19707e-50	Hem5	LOC119568966
4.39733e-54	0.601295	0.266	0.09	6.76441e-50	Hem5	LOC119588771
5.37508e-54	0.918752	0.431	0.205	8.26848e-50	Hem5	LOC119572325
5.44054e-54	0.908572	0.674	0.468	8.36918e-50	Hem5	LOC119597033
5.99542e-54	0.423318	0.162	0.037	9.22275e-50	Hem5	LOC119586834
8.42135e-54	0.963407	0.771	0.609	1.29546e-49	Hem5	LOC119597591
1.26518e-53	1.46266	0.292	0.111	1.94622e-49	Hem5	LOC119579499
2.42547e-53	0.82869	0.73	0.542	3.7311e-49	Hem5	LOC119586106
2.61039e-53	0.529298	0.147	0.031	4.01557e-49	Hem5	LOC119574200
2.85226e-53	0.737567	0.278	0.098	4.38764e-49	Hem5	LOC119589486
3.90312e-53	1.45181	0.127	0.024	6.00417e-49	Hem5	LOC119592230
5.77419e-53	0.874983	0.923	0.842	8.88244e-49	Hem5	LOC119598268
1.79965e-52	0.806484	0.521	0.295	2.76841e-48	Hem5	LOC119592571
2.34758e-52	0.576746	0.977	0.968	3.61128e-48	Hem5	LOC119576971
3.4943e-52	0.662031	0.24	0.077	5.37529e-48	Hem5	LOC119589152
4.73598e-52	1.88289	0.249	0.081	7.28535e-48	Hem5	LOC119576125
6.84925e-52	0.533428	0.252	0.082	1.05362e-47	Hem5	LOC119591255
9.43551e-52	1.10135	0.737	0.604	1.45146e-47	Hem5	LOC119596927
9.75209e-52	0.553332	0.218	0.065	1.50016e-47	Hem5	LOC119578898
1.11325e-51	0.672567	0.258	0.088	1.71251e-47	Hem5	LOC119576931
1.3901e-51	0.809571	0.583	0.357	2.13839e-47	Hem5	LOC119575101
4.66357e-51	0.695795	0.867	0.749	7.17397e-47	Hem5	LOC119571536
8.55674e-50	0.867098	0.509	0.297	1.31628e-45	Hem5	LOC119579409
1.29472e-49	0.830416	0.49	0.269	1.99167e-45	Hem5	LOC119596743
3.6648e-49	0.307493	0.11	0.019	5.63757e-45	Hem5	LOC119586351
4.07318e-49	0.468318	0.114	0.021	6.26578e-45	Hem5	LOC119582801
1.23404e-48	0.838111	0.81	0.714	1.89832e-44	Hem5	LOC119577139
1.61085e-48	0.889216	0.556	0.352	2.47796e-44	Hem5	LOC119575134
1.6219e-48	0.937549	0.507	0.303	2.49497e-44	Hem5	LOC119597279
2.11871e-48	0.714596	0.252	0.086	3.25921e-44	Hem5	LOC119577127
2.40885e-48	0.720044	0.323	0.136	3.70554e-44	Hem5	LOC119581139
2.42612e-48	0.916314	0.892	0.771	3.7321e-44	Hem5	LOC119594120
1.05489e-47	0.533123	0.182	0.05	1.62274e-43	Hem5	LOC119587967
1.37479e-47	0.79248	0.431	0.225	2.11484e-43	Hem5	LOC119576094
2.07994e-47	0.825807	0.202	0.06	3.19957e-43	Hem5	LOC119582769
3.52515e-47	0.750146	0.473	0.261	5.42273e-43	Hem5	LOC119583439
4.79634e-47	0.765754	0.668	0.496	7.37822e-43	Hem5	LOC119581150
4.93837e-47	0.691502	0.876	0.768	7.5967e-43	Hem5	LOC119594972
6.26246e-47	0.825867	0.912	0.84	9.63354e-43	Hem5	LOC119579306
8.81644e-47	0.668833	0.304	0.123	1.35623e-42	Hem5	LOC119589190
8.88249e-47	0.816115	0.368	0.157	1.36639e-42	Hem5	LOC119597422
2.90069e-46	0.899335	0.536	0.325	4.46213e-42	Hem5	LOC119582673
3.32534e-46	0.403623	0.104	0.018	5.11537e-42	Hem5	LOC119580338
4.05995e-46	0.467925	0.927	0.742	6.24542e-42	Hem5	LOC119598351
1.10844e-45	0.783021	0.72	0.568	1.70511e-41	Hem5	LOC119580983
1.35698e-45	0.784275	0.379	0.182	2.08744e-41	Hem5	LOC119592471
1.55944e-45	0.603888	0.127	0.027	2.39888e-41	Hem5	LOC119582603
3.88646e-45	0.67563	0.87	0.737	5.97855e-41	Hem5	LOC119580407
4.02461e-45	0.613386	0.267	0.099	6.19107e-41	Hem5	LOC119576207
9.9512e-45	0.738158	0.668	0.48	1.53079e-40	Hem5	LOC119593056
1.14451e-44	0.529558	0.957	0.946	1.7606e-40	Hem5	LOC119594903
3.47473e-44	0.499257	0.96	0.931	5.34518e-40	Hem5	LOC119581839
4.67181e-44	0.522806	0.226	0.076	7.18664e-40	Hem5	LOC119584282
6.0191e-44	0.353704	0.107	0.02	9.25918e-40	Hem5	LOC119578017
8.9987e-44	0.535234	0.206	0.065	1.38427e-39	Hem5	LOC119582271
1.32995e-43	0.683718	0.838	0.736	2.04586e-39	Hem5	LOC119580851
7.62754e-43	0.822537	0.468	0.271	1.17335e-38	Hem5	LOC119595068
1.27393e-42	0.656988	0.369	0.179	1.95968e-38	Hem5	LOC119594760
1.86649e-42	0.676255	0.779	0.678	2.87122e-38	Hem5	LOC119596989
2.43445e-42	0.466499	0.991	0.982	3.74492e-38	Hem5	LOC119583785
7.2627e-42	0.862054	0.629	0.467	1.11722e-37	Hem5	LOC119572328
9.42767e-42	0.46711	0.187	0.057	1.45026e-37	Hem5	LOC119585253
1.01085e-41	0.761176	0.342	0.162	1.55499e-37	Hem5	LOC119568800
1.04035e-41	0.506097	0.968	0.964	1.60037e-37	Hem5	LOC119573323
1.1381e-41	0.861104	0.457	0.265	1.75074e-37	Hem5	LOC119587059
6.01848e-41	0.574954	0.311	0.136	9.25823e-37	Hem5	LOC119574630
1.57427e-40	1.05731	0.771	0.658	2.4217e-36	Hem5	LOC119580411
1.85902e-40	0.593448	0.139	0.036	2.85974e-36	Hem5	LOC119586367
2.21096e-40	0.630838	0.328	0.149	3.40112e-36	Hem5	LOC119574485
3.92999e-40	0.717861	0.246	0.096	6.04551e-36	Hem5	LOC119575500
8.05731e-40	0.400134	0.142	0.037	1.23946e-35	Hem5	LOC119579506
1.11653e-39	0.455788	0.181	0.056	1.71756e-35	Hem5	LOC119580973
2.42826e-39	0.889131	0.611	0.424	3.73539e-35	Hem5	LOC119575035
7.29483e-39	0.691718	0.253	0.1	1.12216e-34	Hem5	LOC119572326
7.99826e-39	0.745322	0.519	0.33	1.23037e-34	Hem5	LOC119590021
9.48056e-39	0.71563	0.675	0.503	1.45839e-34	Hem5	LOC119592092
3.35763e-38	0.714289	0.464	0.276	5.16504e-34	Hem5	LOC119579358
6.89466e-38	0.692337	0.852	0.628	1.06061e-33	Hem5	LOC119589377
1.20587e-37	0.650393	0.459	0.266	1.85499e-33	Hem5	LOC119570696
2.1418e-37	0.489636	0.147	0.041	3.29474e-33	Hem5	LOC119590713
4.2182e-37	0.528067	0.306	0.136	6.48885e-33	Hem5	LOC119594653
4.85042e-37	0.736786	0.501	0.324	7.46141e-33	Hem5	LOC119587128
5.27279e-37	0.775117	0.481	0.29	8.11113e-33	Hem5	LOC119586785
6.79989e-37	0.543964	0.841	0.736	1.04603e-32	Hem5	LOC119584968
1.11906e-36	0.363382	0.119	0.029	1.72144e-32	Hem5	LOC119590676
1.60627e-36	0.620626	0.303	0.142	2.47093e-32	Hem5	LOC119594981
1.77681e-36	0.777353	0.127	0.033	2.73327e-32	Hem5	LOC119596073
3.61014e-36	0.606695	0.321	0.152	5.55347e-32	Hem5	LOC119598501
4.85358e-36	0.697739	0.383	0.206	7.46627e-32	Hem5	LOC119574258
5.97344e-36	0.392631	0.121	0.03	9.18894e-32	Hem5	LOC119581129
6.07552e-36	0.628012	0.233	0.092	9.34597e-32	Hem5	LOC119587777
1.26055e-35	0.551614	0.167	0.054	1.9391e-31	Hem5	LOC119594659
1.78862e-35	0.780154	0.374	0.198	2.75144e-31	Hem5	LOC119595862
3.68636e-35	0.611283	0.396	0.215	5.67073e-31	Hem5	LOC119572144
6.71321e-35	0.567901	0.199	0.072	1.03269e-30	Hem5	LOC119591568
1.08637e-34	0.513116	0.264	0.114	1.67116e-30	Hem5	LOC119576677
1.1893e-34	0.68034	0.76	0.648	1.8295e-30	Hem5	LOC119577108
2.10372e-34	0.618218	0.212	0.08	3.23616e-30	Hem5	LOC119596560
3.38153e-34	0.676396	0.578	0.421	5.20181e-30	Hem5	LOC119593735
8.65813e-34	0.809244	0.318	0.152	1.33188e-29	Hem5	LOC119580379
2.20483e-33	0.482046	0.943	0.911	3.39169e-29	Hem5	LOC119572599
2.57439e-33	0.600188	0.719	0.588	3.96018e-29	Hem5	LOC119597790
2.90058e-33	0.697258	0.736	0.625	4.46196e-29	Hem5	LOC119580002
3.67742e-33	0.459137	0.206	0.077	5.65698e-29	Hem5	LOC119592744
6.35551e-33	0.659845	0.624	0.47	9.77667e-29	Hem5	LOC119578126
8.0515e-33	0.373811	0.104	0.025	1.23856e-28	Hem5	LOC119592259
[truncated: 1,502 more rows]
